# Supplementary material for: An analytical data inversion method for magnetic circular dichroism spectra dominated by the “B-term”
Source: Royal Society of Chemistry journal article supplement (doi:10.1039/c3cp53730g), 2013-12-04
Supplement: c3cp53730g.xlsx [file c3cp53730g.xlsx]

## Sheet: BChl-a ether  Umetsu
Spreadsheet to evaluate maximum-possible fraction of Qx absorption and Qx-Qy gap by analytical inversion of MCD and ABS data
Source: Reimers, Cai, Kobyashi, Rätsep, Freiberg and Krausz
Enter the observed data in the blue fields incolumns A,B,C as frequency, Absorption/frequency, and MCD Delta Absorption / frequency. Assumes equally spaced in frequency (else replace all sums by integrals)
NOTE: this analysis will only work well if the data has little noise, the band tails are included, there are no interfering transitions, there is only 1 species present (eg no aggregation) and the base line is accurate.
Enter the Magnetic field strength and other factors needed to express B/D in physical units in cell D17
Data filtering parameters entered in cells M12 and O12 eliminates noise due to weak signals; a small relative error in the data inversion usually results because of this
A valid soution is obtained for any rescaling ³1 of the initial Bx/Dx beyond the value that gives maximal Dx absorption, enter a rescaling in cell M13
Yellow boxes contain intermediate and final outupts
																approx Qx-Qy unperturbed gap: Ex-Ey+lx-ly=
SUM:	29.3069	-15.7873			Data Filter: Include in max/min test if relative MCD signal >							0.5	rel abs >	0.03
MAX:	0.993	0.9869			Bx/Dx from min value gives max possible Dx, rescale by (³ 1)							1						3867.46
MIN:	0.0046	-0.9319				Bx/Dx= min value			-6.29988	rescalled	-6.29988	in T^-1 =	-0.00166317			Ave E=	4105.68	238.222
						By/Dy= max value			1.01854			in T^-1 =	0.000268894
BChl-a in ether						fraction Qx abs =Dx/(Dx+Dy)=			0.212782		ratio -Bx/By=		1.67184
B/D scaling to units of Tesla^-1			0.000264
Experimental Data:				DA/A				Polarization			Partitioned ABS and MCD						Ave abs energy
n	A/n	DA/n		Raw	Filter	Filtered		fr. X	LD		Ax/n	Ay/n	DAx/n	DAy/n	Rel error		Ax	Ay
-633	0.0143	-0.0041		-0.286713	0	0		0.178352	0.643297		0.00255043	0.0117496	-0.0160674	0.0119674	8.78875e-19		-1.61442	-7.43748
-603	0.021	0.0005		0.0238095	0	0		0.135921	0.728158		0.00285434	0.0181457	-0.017982	0.018482	3.95494e-18		-1.72117	-10.9418
-573	0.0309	0.0107		0.346278	0	0		0.0918585	0.816283		0.00283843	0.0280616	-0.0178818	0.0285818	5.27325e-18		-1.62642	-16.0793
-543	0.0451	0.0258		0.572062	0	0		0.0610071	0.877986		0.00275142	0.0423486	-0.0173336	0.0431336	0		-1.49402	-22.9953
-513	0.0653	0.0446		0.683002	0	0		0.0458482	0.908304		0.00299389	0.0623061	-0.0188611	0.0634611	0		-1.53586	-31.963
-483	0.0939	0.069		0.734824	0	0		0.038767	0.922466		0.00364022	0.0902598	-0.022933	0.091933	0		-1.75823	-43.5955
-453	0.1332	0.1027		0.771021	0	0		0.033821	0.932358		0.00450496	0.128695	-0.0283807	0.131081	-1.4062e-17		-2.04075	-58.2989
-423	0.1864	0.1468		0.787554	0	0		0.031562	0.936876		0.00588316	0.180517	-0.0370632	0.183863	0		-2.48858	-76.3586
-393	0.2556	0.2039		0.797731	0	0		0.0301714	0.939657		0.0077118	0.247888	-0.0485834	0.252483	0		-3.03074	-97.4201
-363	0.339	0.2754		0.812389	0	0		0.0281684	0.943663		0.00954909	0.329451	-0.0601581	0.335558	0		-3.46632	-119.591
-333	0.4322	0.3538		0.818602	0	0		0.0273194	0.945361		0.0118075	0.420393	-0.0743856	0.428186	0		-3.93188	-139.991
-303	0.5304	0.4359		0.821833	0	0		0.0268781	0.946244		0.0142561	0.516144	-0.0898119	0.525712	-5.6248e-17		-4.31961	-156.392
-273	0.6276	0.5249		0.836361	1	0.836361		0.0248929	0.950214		0.0156228	0.611977	-0.0984218	0.623322	0		-4.26502	-167.07
-243	0.7172	0.6167		0.859872	1	0.859872		0.0216804	0.956639		0.0155491	0.701651	-0.0979578	0.714658	0		-3.77844	-170.501
-213	0.7973	0.7116		0.892512	1	0.892512		0.0172203	0.965559		0.0137297	0.78357	-0.0864958	0.798096	1.12496e-16		-2.92444	-166.9
-183	0.8683	0.8108		0.933779	1	0.933779		0.0115816	0.976837		0.0100563	0.858244	-0.0633535	0.874153	-1.12496e-16		-1.8403	-157.059
-153	0.9267	0.9027		0.974102	1	0.974102		0.0060718	0.987856		0.00562673	0.921073	-0.0354477	0.938148	0		-0.86089	-140.924
-123	0.9675	0.9668		0.999276	1	0.999276		0.00263187	0.994736		0.00254633	0.964954	-0.0160416	0.982842	-1.12496e-16		-0.313199	-118.689
-93	0.9892	0.9869		0.997675	1	0.997675		0.00285071	0.994299		0.00281992	0.98638	-0.0177652	1.00467	0		-0.262253	-91.7333
-63	0.993	0.9665		0.973313	1	0.973313		0.00617953	0.987641		0.00613628	0.986864	-0.0386578	1.00516	0		-0.386585	-62.1724
-33	0.9799	0.9286		0.947648	1	0.947648		0.0096865	0.980627		0.0094918	0.970408	-0.0597972	0.988397	0		-0.31323	-32.0235
-3	0.9513	0.8843		0.92957	1	0.92957		0.0121567	0.975687		0.0115646	0.939735	-0.0728558	0.957156	1.12496e-16		-0.0346939	-2.81921
27	0.909	0.8407		0.924862	1	0.924862		0.0127999	0.9744		0.0116351	0.897365	-0.0732999	0.914	1.12496e-16		0.314148	24.2289
57	0.8561	0.8083		0.944165	1	0.944165		0.0101623	0.979675		0.00869997	0.8474	-0.0548088	0.863109	0		0.495898	48.3018
87	0.7971	0.7748		0.972024	1	0.972024		0.00635575	0.987289		0.00506616	0.792034	-0.0319162	0.806716	0		0.440756	68.9069
117	0.7353	0.7253		0.9864	1	0.9864		0.00439132	0.991217		0.00322893	0.732071	-0.0203419	0.745642	1.12496e-16		0.377785	85.6523
147	0.6717	0.663		0.987048	1	0.987048		0.00430282	0.991394		0.0028902	0.66881	-0.0182079	0.681208	0		0.42486	98.315
177	0.6082	0.6009		0.987997	1	0.987997		0.00417306	0.991654		0.00253806	0.605662	-0.0159895	0.616889	0		0.449236	107.202
207	0.546	0.5461		1.00018	1	1.00018		0.00250798	0.994984		0.00136936	0.544631	-0.00862678	0.554727	0		0.283457	112.739
237	0.4855	0.4945		1.01854	1	1.01854		0	1		0	0.4855	0	0.4945	5.6248e-17		0	115.063
267	0.4295	0.4456		1.03749	0	0		0	1		0	0.4295	0	0.437462	-0.00824613		0	114.677
297	0.3802	0.401		1.05471	0	0		0	1		0	0.3802	0	0.387248	-0.0139346		0	112.919
327	0.3378	0.3564		1.05506	0	0		0	1		0	0.3378	0	0.344062	-0.0125018		0	110.461
357	0.3016	0.3139		1.04078	0	0		0	1		0	0.3016	0	0.307191	-0.00679812		0	107.671
387	0.271	0.2832		1.04502	0	0		0	1		0	0.271	0	0.276024	-0.00727157		0	104.877
417	0.2445	0.2599		1.06299	0	0		0	1		0	0.2445	0	0.249032	-0.0110118		0	101.956
447	0.2207	0.2337		1.0589	0	0		0	1		0	0.2207	0	0.224791	-0.00902701		0	98.6529
477	0.1992	0.2068		1.03815	0	0		0	1		0	0.1992	0	0.202893	-0.00395918		0	95.0184
507	0.1798	0.1877		1.04394	0	0		0	1		0	0.1798	0	0.183133	-0.00462756		0	91.1586
537	0.163	0.1709		1.04847	0	0		0	1		0	0.163	0	0.166022	-0.00494313		0	87.531
567	0.149	0.1585		1.06376	0	0		0	1		0	0.149	0	0.151762	-0.00682734		0	84.483
597	0.1375	0.1525		1.10909	0	0		0	1		0	0.1375	0	0.140049	-0.0126164		0	82.0875
627	0.1278	0.1485		1.16197	0	0		0	1		0	0.1278	0	0.130169	-0.0185742		0	80.1306
657	0.12	0.1418		1.18167	0	0		0	1		0	0.12	0	0.122225	-0.0198353		0	78.84
687	0.1139	0.1312		1.15189	0	0		0	1		0	0.1139	0	0.116011	-0.0153902		0	78.2493
717	0.1088	0.1197		1.10018	0	0		0	1		0	0.1088	0	0.110817	-0.00900102		0	78.0096
747	0.1047	0.1101		1.05158	0	0		0	1		0	0.1047	0	0.106641	-0.00350503		0	78.2109
777	0.102	0.1024		1.00392	0	0		0.00199716	0.996006		0.00020371	0.101796	-0.00128335	0.103683	0		0.158283	79.0957
807	0.1	0.0955		0.955	0	0		0.00868187	0.982636		0.000868187	0.0991318	-0.00546948	0.100969	0		0.700627	79.9994
837	0.0983	0.0861		0.87589	0	0		0.0194916	0.961017		0.00191602	0.096384	-0.0120707	0.0981707	1.4062e-17		1.60371	80.6734
867	0.097	0.0744		0.76701	0	0		0.0343691	0.931262		0.0033338	0.0936662	-0.0210025	0.0954025	0		2.89041	81.2086
897	0.0962	0.0621		0.64553	0	0		0.0509683	0.898063		0.00490315	0.0912968	-0.0308893	0.0929893	1.4062e-17		4.39813	81.8933
927	0.0954	0.0504		0.528302	0	0		0.0669866	0.866027		0.00639052	0.0890095	-0.0402595	0.0906595	7.031e-18		5.92401	82.5118
957	0.0947	0.0383		0.404435	0	0		0.0839119	0.832176		0.00794646	0.0867535	-0.0500617	0.0883617	-7.031e-18		7.60476	83.0231
987	0.094	0.0241		0.256383	0	0		0.104142	0.791716		0.00978935	0.0842107	-0.0616717	0.0857717	-1.05465e-17		9.66209	83.1159
1017	0.0934	0.011		0.117773	0	0		0.123082	0.753836		0.0114958	0.0819042	-0.0724225	0.0834225	-3.5155e-18		11.6913	83.2965
1047	0.0928	0.0008		0.00862069	0	0		0.137997	0.724007		0.0128061	0.0799939	-0.0806768	0.0814768	-4.94367e-18		13.408	83.7536
1077	0.0922	-0.0003		-0.0032538	0	0		0.139619	0.720762		0.0128729	0.0793271	-0.0810976	0.0807976	5.32818e-18		13.8641	85.4353
1107	0.0916	0.0058		0.0633188	0	0		0.130523	0.738955		0.0119559	0.0796441	-0.0753205	0.0811205	0		13.2351	88.1661
1137	0.091	0.0078		0.0857143	0	0		0.127462	0.745075		0.0115991	0.0794009	-0.0730728	0.0808728	1.75775e-18		13.1882	90.2788
1167	0.0904	0.0045		0.0497788	0	0		0.132373	0.735255		0.0119665	0.0784335	-0.0753875	0.0798875	4.39438e-18		13.9649	91.5319
1197	0.0895	0.0018		0.0201117	0	0		0.136426	0.727147		0.0122102	0.0772898	-0.0769226	0.0787226	2.41691e-17		14.6156	92.5159
1227	0.088	0.0001		0.00113636	0	0		0.139019	0.721961		0.0122337	0.0757663	-0.0770708	0.0771708	2.89754e-18		15.0107	92.9653
1257	0.0859	-0.0017		-0.0197905	0	0		0.141879	0.716242		0.0121874	0.0737126	-0.0767791	0.0750791	-7.25072e-18		15.3195	92.6568
1287	0.0835	-0.0024		-0.0287425	0	0		0.143102	0.713796		0.011949	0.071551	-0.0752774	0.0728774	4.39438e-19		15.3784	92.0861
1317	0.0807	-0.0008		-0.00991326	0	0		0.140529	0.718942		0.0113407	0.0693593	-0.0714451	0.0706451	-9.11833e-18		14.9357	91.3462
1347	0.0775	0.0019		0.0245161	0	0		0.135825	0.728351		0.0105264	0.0669736	-0.0663151	0.0682151	-1.09859e-18		14.1791	90.2134
1377	0.074	0.0025		0.0337838	0	0		0.134558	0.730883		0.00995731	0.0640427	-0.0627299	0.0652299	2.19719e-18		13.7112	88.1868
1407	0.0703	0.0012		0.0170697	0	0		0.136842	0.726316		0.00962	0.06068	-0.0606049	0.0618049	1.38423e-17		13.5353	85.3768
1437	0.0664	0.0001		0.00150602	0	0		0.138969	0.722062		0.00922753	0.0571725	-0.0581323	0.0582323	2.89754e-18		13.26	82.1568
1467	0.0621	0.0015		0.0241546	0	0		0.135874	0.728252		0.00843778	0.0536622	-0.053157	0.054657	-5.71269e-18		12.3782	78.7225
1497	0.0577	0.0062		0.107452	0	0		0.124492	0.751016		0.00718319	0.0505168	-0.0452533	0.0514533	4.39438e-18		10.7532	75.6237
1527	0.0536	0.0127		0.23694	0	0		0.106799	0.786403		0.00572441	0.0478756	-0.0360631	0.0487631	3.5155e-18		8.74117	73.106
1557	0.0497	0.0181		0.364185	0	0		0.0894117	0.821177		0.00444376	0.0452562	-0.0279952	0.0460952	3.5155e-18		6.91894	70.464
1587	0.0461	0.0186		0.403471	0	0		0.0840437	0.831913		0.00387441	0.0422256	-0.0244083	0.0430083	-3.5155e-18		6.1487	67.012
1617	0.0428	0.0125		0.292056	0	0		0.0992676	0.801465		0.00424865	0.0385513	-0.026766	0.039266	7.031e-18		6.87007	62.3375
1647	0.0399	0.0039		0.0977444	0	0		0.125819	0.748363		0.00502016	0.0348798	-0.0316264	0.0355264	7.90988e-18		8.26821	57.4471
1677	0.0372	-0.0007		-0.0188172	0	0		0.141746	0.716508		0.00527294	0.0319271	-0.0332189	0.0325189	7.69016e-19		8.84272	53.5417
1707	0.0347	0.0016		0.0461095	0	0		0.132874	0.734252		0.00461073	0.0300893	-0.0290471	0.0306471	6.59156e-19		7.87052	51.3624
1737	0.0327	0.0077		0.235474	0	0		0.106999	0.786002		0.00349887	0.0292011	-0.0220425	0.0297425	1.75775e-18		6.07753	50.7224
1767	0.0311	0.0113		0.363344	0	0		0.0895267	0.820947		0.00278428	0.0283157	-0.0175406	0.0288406	-1.75775e-18		4.91982	50.0339
1797	0.0294	0.0104		0.353741	0	0		0.0908388	0.818322		0.00267066	0.0267293	-0.0168248	0.0272248	-3.5155e-18		4.79918	48.0326
1827	0.027	0.0066		0.244444	0	0		0.105773	0.788453		0.00285588	0.0241441	-0.0179917	0.0245917	1.75775e-18		5.21769	44.1113
1857	0.0247	0.0008		0.0323887	0	0		0.134749	0.730502		0.0033283	0.0213717	-0.0209679	0.0217679	2.08733e-18		6.18065	39.6873
1887	0.0233	-0.0019		-0.0815451	0	0		0.150317	0.699366		0.00350239	0.0197976	-0.0220646	0.0201646	-5.93241e-18		6.609	37.3581
1917	0.0222	0.0031		0.13964	0	0		0.120094	0.759812		0.00266609	0.0195339	-0.016796	0.019896	2.19719e-18		5.11089	37.4465
1947	0.0211	0.0104		0.492891	0	0		0.0718252	0.85635		0.00151551	0.0195845	-0.00954754	0.0199475	3.5155e-18		2.9507	38.131
1977	0.0199	0.0116		0.582915	0	0		0.0595242	0.880952		0.00118453	0.0187155	-0.00746241	0.0190624	0		2.34182	37.0005
2007	0.019	0.0045		0.236842	0	0		0.106812	0.786376		0.00202943	0.0169706	-0.0127852	0.0172852	8.78875e-19		4.07307	34.0599
2037	0.0185	-0.0031		-0.167568	0	0		0.162071	0.675858		0.00299832	0.0155017	-0.018889	0.015789	-2.19719e-18		6.10757	31.5769
2067	0.0181	-0.0077		-0.425414	0	0		0.197304	0.605392		0.0035712	0.0145288	-0.0224981	0.0147981	1.75775e-18		7.38167	30.031
2097	0.0177	-0.008		-0.451977	0	0		0.200933	0.598133		0.00355652	0.0141435	-0.0224057	0.0144057	0		7.45803	29.6589
2127	0.0173	-0.0048		-0.277457	0	0		0.177087	0.645827		0.0030636	0.0142364	-0.0193003	0.0145003	-8.78875e-19		6.51628	30.2808
2157	0.0169	-0.0044		-0.260355	0	0		0.17475	0.6505		0.00295327	0.0139467	-0.0186053	0.0142053	4.39438e-18		6.37021	30.0831
2187	0.0165	-0.0079		-0.478788	0	0		0.204597	0.590806		0.00337585	0.0131242	-0.0212674	0.0133674	3.5155e-18		7.38298	28.7025
2217	0.0161	-0.0089		-0.552795	0	0		0.214709	0.570581		0.00345682	0.0126432	-0.0217776	0.0128776	-3.5155e-18		7.66377	28.0299
2247	0.0158	-0.0062		-0.392405	0	0		0.192793	0.614413		0.00304614	0.0127539	-0.0191903	0.0129903	8.78875e-19		6.84467	28.6579
2277	0.0155	-0.0055		-0.354839	0	0		0.18766	0.624679		0.00290873	0.0125913	-0.0183247	0.0128247	0		6.62319	28.6703
2307	0.0152	-0.0057		-0.375	0	0		0.190415	0.61917		0.00289431	0.0123057	-0.0182338	0.0125338	1.75775e-18		6.67717	28.3892
2337	0.015	-0.0027		-0.18	0	0		0.16377	0.67246		0.00245655	0.0125434	-0.015476	0.012776	8.78875e-19		5.74096	29.314
2367	0.0147	0.0008		0.0544218	0	0		0.131738	0.736523		0.00193655	0.0127634	-0.0122001	0.0130001	3.29578e-19		4.58382	30.2111
2397	0.0144	-0.0003		-0.0208333	0	0		0.142021	0.715957		0.00204511	0.0123549	-0.0128839	0.0125839	1.81268e-18		4.90212	29.6147
2427	0.0141	-0.0044		-0.312057	0	0		0.181814	0.636371		0.00256358	0.0115364	-0.0161503	0.0117503	2.63663e-18		6.22182	27.9989
2457	0.0138	-0.0082		-0.594203	0	0		0.220367	0.559265		0.00304107	0.0107589	-0.0191584	0.0109584	-1.75775e-18		7.47191	26.4347
2487	0.0136	-0.0068		-0.5	0	0		0.207495	0.585009		0.00282194	0.0107781	-0.0177779	0.0109779	8.78875e-19		7.01816	26.805
2517	0.0133	-0.0013		-0.0977444	0	0		0.15253	0.694939		0.00202866	0.0112713	-0.0127803	0.0114803	2.63663e-18		5.10613	28.37
2547	0.013	0.0032		0.246154	0	0		0.10554	0.788921		0.00137202	0.011628	-0.00864354	0.0118435	1.31831e-18		3.49453	29.6165
2577	0.0128	0.0033		0.257812	0	0		0.103947	0.792107		0.00133052	0.0114695	-0.0083821	0.0116821	8.78875e-19		3.42874	29.5569
2607	0.0125	0.0004		0.032	0	0		0.134802	0.730396		0.00168503	0.010815	-0.0106155	0.0110155	1.04366e-18		4.39286	28.1946
2637	0.0123	-0.0007		-0.0569106	0	0		0.146951	0.706098		0.0018075	0.0104925	-0.011387	0.010687	7.69016e-19		4.76637	27.6687
2667	0.0122	-0.0005		-0.0409836	0	0		0.144775	0.710451		0.00176625	0.0104337	-0.0111272	0.0106272	1.31831e-18		4.71059	27.8268
2697	0.0119	-0.0016		-0.134454	0	0		0.157547	0.684907		0.0018748	0.0100252	-0.011811	0.010211	1.09859e-18		5.05635	27.038
2727	0.0117	-0.0048		-0.410256	0	0		0.195233	0.609535		0.00228422	0.00941578	-0.0143903	0.00959032	8.78875e-19		6.22907	25.6768
2757	0.0114	-0.0092		-0.807018	0	0		0.249447	0.501107		0.00284369	0.00855631	-0.0179149	0.00871492	-1.75775e-18		7.84006	23.5897
2787	0.0112	-0.0124		-1.10714	0	0		0.290456	0.419087		0.00325311	0.00794689	-0.0204942	0.00809421	5.27325e-18		9.06642	22.148
2817	0.011	-0.0112		-1.01818	0	0		0.2783	0.443399		0.00306131	0.00793869	-0.0192859	0.00808586	0		8.6237	22.3633
2847	0.0109	-0.005		-0.458716	0	0		0.201854	0.596292		0.00220021	0.00869979	-0.0138611	0.00886106	-2.63663e-18		6.264	24.7683
2877	0.0108	-0.0006		-0.0555556	0	0		0.146766	0.706468		0.00158507	0.00921493	-0.00998575	0.00938575	-1.64789e-18		4.56025	26.5114
2907	0.0108	-0.0032		-0.296296	0	0		0.179661	0.640678		0.00194034	0.00885966	-0.0122239	0.0090239	4.39438e-19		5.64056	25.755
2937	0.0107	-0.007		-0.654206	0	0		0.228566	0.542868		0.00244566	0.00825434	-0.0154074	0.00840736	-8.78875e-19		7.1829	24.243
2967	0.0107	-0.0047		-0.439252	0	0		0.199195	0.601611		0.00213138	0.00856862	-0.0134275	0.00872746	-2.63663e-18		6.32381	25.4231
2997	0.0107	-0.0012		-0.11215	0	0		0.154499	0.691002		0.00165314	0.00904686	-0.0104146	0.00921457	-1.53803e-18		4.95445	27.1134
3027	0.0108	-0.0034		-0.314815	0	0		0.182191	0.635617		0.00196767	0.00883233	-0.0123961	0.00899606	1.31831e-18		5.95613	26.7355
3057	0.0107	-0.0086		-0.803738	0	0		0.248999	0.502003		0.00266429	0.00803571	-0.0167847	0.00818468	1.75775e-18		8.14472	24.5652
3087	0.0107	-0.0106		-0.990654	0	0		0.274539	0.450922		0.00293757	0.00776243	-0.0185063	0.00790633	-3.5155e-18		9.06827	23.9626
3117	0.0107	-0.0095		-0.88785	0	0		0.260492	0.479016		0.00278726	0.00791274	-0.0175594	0.00805942	-1.75775e-18		8.6879	24.664
3147	0.0106	-0.0101		-0.95283	0	0		0.269371	0.461258		0.00285533	0.00774467	-0.0179882	0.00788824	-1.75775e-18		8.98572	24.3725
3177	0.0106	-0.0149		-1.40566	0	0		0.331246	0.337508		0.00351121	0.00708879	-0.0221202	0.0072202	3.5155e-18		11.1551	22.5211
3207	0.0106	-0.0221		-2.08491	0	0		0.424059	0.151881		0.00449503	0.00610497	-0.0283181	0.00621814	7.031e-18		14.4156	19.5786
3237	0.0106	-0.0281		-2.65094	0	0		0.501404	-0.00280714		0.00531488	0.00528512	-0.0334831	0.0053831	3.5155e-18		17.2043	17.1079
3267	0.0109	-0.0302		-2.77064	0	0		0.517759	-0.0355188		0.00564358	0.00525642	-0.0355539	0.00535386	0		18.4376	17.1727
3297	0.0117	-0.0306		-2.61538	0	0		0.496545	0.00691047		0.00580957	0.00589043	-0.0365996	0.00599962	-3.5155e-18		19.1542	19.4207
3327	0.0132	-0.0377		-2.85606	0	0		0.529431	-0.0588622		0.00698849	0.00621151	-0.0440267	0.00632666	7.031e-18		23.2507	20.6657
3357	0.0149	-0.055		-3.69128	0	0		0.643556	-0.287112		0.00958899	0.00531101	-0.0604095	0.00540947	0		32.1902	17.8291
3387	0.0172	-0.0742		-4.31395	0	0		0.72864	-0.45728		0.0125326	0.00466739	-0.0789539	0.00475392	0		42.4479	15.8085
3417	0.02	-0.0929		-4.645	0	0		0.773875	-0.547749		0.0154775	0.00452251	-0.0975063	0.00460635	0		52.8866	15.4534
3447	0.0233	-0.1132		-4.85837	0	0		0.80303	-0.606059		0.0187106	0.00458941	-0.117874	0.00467449	0		64.4954	15.8197
3477	0.0269	-0.1355		-5.03717	0	0		0.827462	-0.654924		0.0222587	0.00464127	-0.140227	0.00472731	0		77.3936	16.1377
3507	0.0309	-0.1626		-5.26214	0	0		0.858201	-0.716402		0.0265184	0.00438159	-0.167063	0.00446281	0		93.0001	15.3662
3537	0.0353	-0.1909		-5.40793	0	0		0.878123	-0.756246		0.0309977	0.00430227	-0.195282	0.00438202	-2.8124e-17		109.639	15.2171
3567	0.0397	-0.2166		-5.45592	0	0		0.88468	-0.76936		0.0351218	0.00457821	-0.221263	0.00466308	0		125.279	16.3305
3597	0.0437	-0.2407		-5.50801	0	0		0.891797	-0.783595		0.0389715	0.00472845	-0.245516	0.0048161	0		140.181	17.0082
3627	0.0477	-0.2688		-5.63522	0	0		0.90918	-0.81836		0.0433679	0.00433212	-0.273212	0.00441243	0		157.295	15.7126
3657	0.0522	-0.3114		-5.96552	0	0		0.954312	-0.908624		0.0498151	0.00238491	-0.313829	0.00242912	0		182.174	8.72161
3687	0.0567	-0.3541		-6.24515	0	0		0.992522	-0.985043		0.056276	0.00042403	-0.354532	0.00043189	-5.6248e-17		207.49	1.5634
3717	0.0613	-0.3834		-6.25449	0	0		0.993797	-0.987594		0.0609198	0.000380229	-0.383787	0.000387278	0		226.439	1.41331
3747	0.0658	-0.4089		-6.21429	0	0		0.988304	-0.976608		0.0650304	0.000769584	-0.409684	0.00078385	5.6248e-17		243.669	2.88363
3777	0.0707	-0.4354		-6.15842	0	0		0.98067	-0.96134		0.0693334	0.00136663	-0.436792	0.00139196	0		261.872	5.16175
3807	0.0763	-0.4705		-6.16645	1	-6.16645		0.981768	-0.963535		0.0749089	0.00139113	-0.471917	0.00141692	5.6248e-17		285.178	5.29604
3837	0.0827	-0.5121		-6.19226	1	-6.19226		0.985295	-0.970589		0.0814839	0.00121613	-0.513339	0.00123867	0		312.654	4.66628
3867	0.0895	-0.5477		-6.11955	1	-6.11955		0.97536	-0.95072		0.0872947	0.0022053	-0.549946	0.00224618	0		337.569	8.52789
3897	0.0963	-0.5852		-6.07684	1	-6.07684		0.969524	-0.939048		0.0933651	0.00293485	-0.588189	0.00298926	-1.12496e-16		363.844	11.4371
3927	0.1032	-0.6242		-6.04845	1	-6.04845		0.965644	-0.931288		0.0996545	0.00354553	-0.627811	0.00361126	0		391.343	13.9233
3957	0.1099	-0.6589		-5.99545	1	-5.99545		0.958402	-0.916804		0.105328	0.0045716	-0.663556	0.00465634	1.12496e-16		416.784	18.0898
3987	0.1162	-0.6882		-5.92255	1	-5.92255		0.948441	-0.896881		0.110209	0.0059912	-0.694302	0.00610226	1.12496e-16		439.402	23.8869
4017	0.1222	-0.717		-5.86743	1	-5.86743		0.940909	-0.881819		0.114979	0.00722088	-0.724355	0.00735474	0		461.871	29.0063
4047	0.1281	-0.7542		-5.88759	1	-5.88759		0.943664	-0.887327		0.120883	0.00721668	-0.76155	0.00735046	1.12496e-16		489.215	29.2059
4077	0.1337	-0.7867		-5.88407	1	-5.88407		0.943183	-0.886366		0.126104	0.00759645	-0.794437	0.00773727	0		514.124	30.9707
4107	0.1388	-0.8083		-5.82349	1	-5.82349		0.934905	-0.86981		0.129765	0.00903521	-0.817503	0.0092027	1.12496e-16		532.944	37.1076
4137	0.1432	-0.828		-5.78212	1	-5.78212		0.929253	-0.858506		0.133069	0.010131	-0.838319	0.0103188	0		550.506	41.9119
4167	0.1467	-0.8481		-5.78119	1	-5.78119		0.929125	-0.85825		0.136303	0.0103974	-0.85869	0.0105901	0		567.973	43.3259
4197	0.1494	-0.8685		-5.81325	1	-5.81325		0.933506	-0.867013		0.139466	0.00993413	-0.878618	0.0101183	0		585.338	41.6936
4227	0.1512	-0.8917		-5.89749	1	-5.89749		0.945016	-0.890033		0.142886	0.00831354	-0.900168	0.00846765	-2.24992e-16		603.981	35.1413
4257	0.1524	-0.914		-5.99738	1	-5.99738		0.958665	-0.91733		0.146101	0.00629942	-0.920416	0.0064162	1.12496e-16		621.95	26.8166
4287	0.153	-0.9279		-6.06471	1	-6.06471		0.967865	-0.935731		0.148083	0.0049166	-0.932908	0.00500774	0		634.834	21.0775
4317	0.1528	-0.9319		-6.09882	1	-6.09882		0.972527	-0.945054		0.148602	0.00419787	-0.936176	0.00427569	1.12496e-16		641.515	18.1222
4347	0.1518	-0.9216		-6.07115	1	-6.07115		0.968745	-0.937491		0.147056	0.00474445	-0.926432	0.0048324	-1.12496e-16		639.25	20.6241
4377	0.15	-0.9013		-6.00867	1	-6.00867		0.960208	-0.920416		0.144031	0.00596879	-0.907379	0.00607943	0		630.425	26.1254
4407	0.1477	-0.8828		-5.97698	1	-5.97698		0.955878	-0.911757		0.141183	0.00651676	-0.889438	0.00663756	1.12496e-16		622.195	28.7193
4437	0.1443	-0.8612		-5.96812	1	-5.96812		0.954668	-0.909336		0.137759	0.00654141	-0.867863	0.00666267	0		611.235	29.0242
4467	0.1398	-0.8338		-5.96423	1	-5.96423		0.954137	-0.908274		0.133388	0.00641167	-0.840331	0.00653053	0		595.846	28.6409
4497	0.1348	-0.8039		-5.96365	1	-5.96365		0.954057	-0.908114		0.128607	0.00619313	-0.810208	0.00630793	1.12496e-16		578.345	27.8505
4527	0.1295	-0.7742		-5.97838	1	-5.97838		0.956069	-0.912139		0.123811	0.00568901	-0.779994	0.00579447	0		560.492	25.7541
4557	0.1237	-0.7449		-6.02183	1	-6.02183		0.962006	-0.924013		0.119	0.00469982	-0.749687	0.00478694	0		542.284	21.4171
4587	0.1176	-0.7143		-6.07398	1	-6.07398		0.969133	-0.938265		0.11397	0.00363001	-0.717997	0.0036973	-1.12496e-16		522.78	16.6509
4617	0.1107	-0.6801		-6.14363	1	-6.14363		0.97865	-0.9573		0.108337	0.00236346	-0.682507	0.00240727	0		500.19	10.9121
4647	0.1035	-0.6409		-6.19227	1	-6.19227		0.985296	-0.970592		0.101978	0.00152186	-0.64245	0.00155008	0		473.892	7.0721
4677	0.0967	-0.6003		-6.20786	1	-6.20786		0.987426	-0.974852		0.0954841	0.0012159	-0.601538	0.00123844	0		446.579	5.68675
4707	0.0903	-0.5644		-6.25028	1	-6.25028		0.993222	-0.986444		0.089688	0.000612046	-0.565023	0.000623392	0		422.161	2.8809
4737	0.0837	-0.5273		-6.29988	1	-6.29988		1	-1		0.0837	0	-0.5273	0	0		396.487	0
4767	0.0771	-0.4837		-6.27367	1	-6.27367		0.996419	-0.992837		0.0768239	0.000276124	-0.483981	0.000281242	0		366.219	1.31628
4797	0.0707	-0.4461		-6.30976	0	0		1	-1		0.0707	0	-0.445402	0	0.000707718		339.148	0
4827	0.0649	-0.4138		-6.37596	0	0		1	-1		0.0649	0	-0.408862	0	0.0050033		313.272	0
4857	0.0595	-0.3813		-6.4084	0	0		1	-1		0.0595	0	-0.374843	0	0.00654282		288.991	0
4887	0.0547	-0.3508		-6.41316	0	0		1	-1		0.0547	0	-0.344603	0	0.00627879		267.319	0
4917	0.0502	-0.3247		-6.46813	0	0		1	-1		0.0502	0	-0.316254	0	0.00855811		246.833	0
4947	0.046	-0.3037		-6.60217	0	0		1	-1		0.046	0	-0.289795	0	0.0140901		227.562	0
4977	0.0425	-0.2866		-6.74353	0	0		1	-1		0.0425	0	-0.267745	0	0.0191054		211.523	0
5007	0.0396	-0.2714		-6.85354	0	0		1	-1		0.0396	0	-0.249475	0	0.0222158		198.277	0
5037	0.0371	-0.2556		-6.88949	0	0		1	-1		0.0371	0	-0.233726	0	0.0221648		186.873	0
5067	0.0349	-0.2383		-6.82808	0	0		1	-1		0.0349	0	-0.219866	0	0.0186789		176.838	0
5097	0.033	-0.2211		-6.7	0	0		1	-1		0.033	0	-0.207896	0	0.0133792		168.201	0
5127	0.0314	-0.205		-6.52866	0	0		1	-1		0.0314	0	-0.197816	0	0.00727911		160.988	0
5157	0.0299	-0.1903		-6.36455	0	0		1	-1		0.0299	0	-0.188366	0	0.00195924		154.194	0
5187	0.0286	-0.1776		-6.20979	0	0		0.98769	-0.97538		0.0282479	0.000352068	-0.177959	0.000358595	0		146.522	1.82618
5217	0.0276	-0.1679		-6.08333	0	0		0.970411	-0.940821		0.0267833	0.000816666	-0.168732	0.000831805	0		139.729	4.26055
5247	0.0266	-0.1599		-6.01128	0	0		0.960565	-0.92113		0.025551	0.00104897	-0.160968	0.00106842	0		134.066	5.50396
5277	0.0254	-0.1503		-5.91732	0	0		0.947727	-0.895453		0.0240723	0.00132774	-0.151652	0.00135235	0		127.029	7.00649
5307	0.0243	-0.1403		-5.77366	0	0		0.928097	-0.856194		0.0225528	0.00174725	-0.14208	0.00177964	0		119.687	9.27265
5337	0.0236	-0.1343		-5.69068	0	0		0.916758	-0.833515		0.0216355	0.00196452	-0.136301	0.00200094	0		115.469	10.4846
5367	0.0229	-0.1316		-5.74672	0	0		0.924416	-0.848832		0.0211691	0.00173087	-0.133363	0.00176296	0		113.615	9.2896
5397	0.0223	-0.1299		-5.82511	0	0		0.935127	-0.870254		0.0208533	0.00144667	-0.131373	0.00147349	0		112.545	7.80768
5427	0.0218	-0.1283		-5.88532	0	0		0.943354	-0.886708		0.0205651	0.00123488	-0.129558	0.00125778	0		111.607	6.70171
5457	0.0213	-0.1269		-5.95775	0	0		0.95325	-0.906501		0.0203042	0.000995769	-0.127914	0.00101423	2.8124e-17		110.8	5.43391
5487	0.0208	-0.1261		-6.0625	0	0		0.967564	-0.935128		0.0201253	0.00067467	-0.126787	0.000687176	0		110.428	3.70191
5517	0.0203	-0.1276		-6.28571	0	0		0.998064	-0.996129		0.0202607	3.92946e-05	-0.12764	4.00231e-05	0		111.778	0.216789
5547	0.0198	-0.1333		-6.73232	0	0		1	-1		0.0198	0	-0.124738	0	0.00867602		109.831	0
5577	0.0192	-0.1354		-7.05208	0	0		1	-1		0.0192	0	-0.120958	0	0.014634		107.078	0
5607	0.0186	-0.1244		-6.68817	0	0		1	-1		0.0186	0	-0.117178	0	0.00731809		104.29	0
5637	0.0181	-0.1049		-5.79558	0	0		0.931092	-0.862183		0.0168528	0.00124724	-0.10617	0.00127036	1.4062e-17		94.999	7.0307
5667	0.0174	-0.0914		-5.25287	0	0		0.856935	-0.713871		0.0149107	0.00248932	-0.0939355	0.00253547	-1.4062e-17		84.4988	14.107
5697	0.0165	-0.0942		-5.70909	0	0		0.919274	-0.838547		0.015168	0.00133199	-0.0955567	0.00135668	1.4062e-17		86.4122	7.58832
5727	0.0157	-0.1024		-6.52229	0	0		1	-1		0.0157	0	-0.0989081	0	0.00353823		89.9139	0
5757	0.0151	-0.1041		-6.89404	0	0		1	-1		0.0151	0	-0.0951282	0	0.00909089		86.9307	0
5787	0.0147	-0.1008		-6.85714	0	0		1	-1		0.0147	0	-0.0926082	0	0.00830049		85.0689	0
5817	0.0141	-0.0953		-6.75887	0	0		1	-1		0.0141	0	-0.0888283	0	0.00655759		82.0197	0
5847	0.0135	-0.0895		-6.62963	0	0		1	-1		0.0135	0	-0.0850484	0	0.0045107		78.9345	0
5877	0.0129	-0.0837		-6.48837	0	0		1	-1		0.0129	0	-0.0812685	0	0.00246382		75.8133	0
5907	0.0123	-0.0777		-6.31707	0	0		1	-1		0.0123	0	-0.0774885	0	0.000214277		72.6561	0
5937	0.0117	-0.0715		-6.11111	0	0		0.974206	-0.948413		0.0113982	0.000301787	-0.0718074	0.000307381	-1.4062e-17		67.6712	1.79171
5967	0.0111	-0.0654		-5.89189	0	0		0.944252	-0.888504		0.0104812	0.000618805	-0.0660303	0.000630276	1.4062e-17		62.5413	3.69241
5997	0.0105	-0.0595		-5.66667	0	0		0.913477	-0.826953		0.00959151	0.000908495	-0.0604253	0.000925336	-7.031e-18		57.5203	5.44824
6027	0.01	-0.0541		-5.41	0	0		0.878405	-0.756811		0.00878405	0.00121595	-0.0553385	0.00123849	-7.031e-18		52.9415	7.32851
6057	0.0094	-0.0503		-5.35106	0	0		0.870352	-0.740704		0.00818131	0.00121869	-0.0515413	0.00124128	-7.031e-18		49.5542	7.3816
6087	0.0088	-0.0494		-5.61364	0	0		0.906231	-0.812461		0.00797483	0.000825171	-0.0502405	0.000840468	0		48.5428	5.02282
6117	0.0084	-0.0508		-6.04762	0	0		0.965531	-0.931061		0.00811046	0.000289543	-0.0510949	0.00029491	7.031e-18		49.6117	1.77113
6147	0.0078	-0.0531		-6.80769	0	0		1	-1		0.0078	0	-0.0491391	0	0.00401351		47.9466	0
6177	0.0072	-0.0545		-7.56944	0	0		1	-1		0.0072	0	-0.0453591	0	0.00926219		44.4744	0
6207	0.0064	-0.053		-8.28125	0	0		1	-1		0.0064	0	-0.0403192	0	0.0128491		39.7248	0
6237	0.0056	-0.0485		-8.66071	0	0		1	-1		0.0056	0	-0.0352793	0	0.0133962		34.9272	0
6267	0.0052	-0.0419		-8.05769	0	0		1	-1		0.0052	0	-0.0327594	0	0.00926195		32.5884	0
6297	0.0049	-0.0353		-7.20408	0	0		1	-1		0.0049	0	-0.0308694	0	0.0044894		30.8553	0
6327	0.0046	-0.0303		-6.58696	0	0		1	-1		0.0046	0	-0.0289795	0	0.00133808		29.1042	0

## Sheet: Chlorin-e6 TME dioxane
Spreadsheet to evaluate maximum-possible fraction of Qx absorption and Qx-Qy gap by analytical inversion of MCD and ABS data
Source: Reimers, Cai, Kobyashi, Rätsep, Freiberg and Krausz
Enter the observed data in the blue fields incolumns A,B,C as frequency, Absorption/frequency, and MCD Delta Absorption / frequency. Assumes equally spaced in frequency (else replace all sums by integrals)
NOTE: this analysis will only work well if the data has little noise, the band tails are included, there are no interfering transitions, there is only 1 species present (eg no aggregation) and the base line is accurate.
Enter the Magnetic field strength and other factors needed to express B/D in physical units in cell D17
Data filtering parameters entered in cells M12 and O12 eliminates noise due to weak signals; a small relative error in the data inversion usually results because of this
A valid soution is obtained for any rescaling ³1 of the initial Bx/Dx beyond the value that gives maximal Dx absorption, enter a rescaling in cell M13
Yellow boxes contain intermediate and final outupts
									POOR AGREEMENT Qy(0,0) ABS & MCD !!							approx Qx-Qy unperturbed gap: Ex-Ey+lx-ly=
SUM:	25.369	-72.5098			Data Filter: Include in max/min test if relative MCD signal >							0.6	rel abs >	0.03
MAX:	0.9859	0.9922			Bx/Dx from min value gives max possible Dx, rescale by (³ 1)							1						2201.48
MIN:	0.0033	-3.1793				Bx/Dx= min value			-76.6482	rescalled	-76.6482	in T^-1 =	-0.0347216			Ave E=	3425.15	1223.67
						By/Dy= max value			1.02566			in T^-1 =	0.000464626
Chlorin-e6 TME dioxane						fraction Qx abs =Dx/(Dx+Dy)=			0.0500023		ratio -Bx/By=		3.93336
B/D scaling to units of Tesla^-1			0.000453
Experimental Data:				DA/A				Polarization			Partitioned ABS and MCD						Ave abs energy
n	A/n	DA/n		Raw	Filter	Filtered		fr. X	LD		Ax/n	Ay/n	DAx/n	DAy/n	Rel error		Ax	Ay
-567	0.0623	0.0249		0.399679	0	0		0.00805915	0.983882		0.000502085	0.0617979	-0.0384839	0.0633839	0		-0.284682	-35.0394
-537	0.0749	0.0527		0.703605	0	0		0.00414631	0.991707		0.000310559	0.0745894	-0.0238038	0.0765038	4.36505e-18		-0.16677	-40.0545
-507	0.0912	0.0903		0.990132	0	0		0.000457465	0.999085		4.17208e-05	0.0911583	-0.00319783	0.0934978	4.36505e-18		-0.0211525	-46.2172
-477	0.1097	0.1348		1.22881	0	0		0	1		0	0.1097	0	0.112515	-0.00700927		0	-52.3269
-447	0.1303	0.1876		1.43975	0	0		0	1		0	0.1303	0	0.133644	-0.016971		0	-58.2441
-417	0.1523	0.2457		1.61326	0	0		0	1		0	0.1523	0	0.156209	-0.0281481		0	-63.5091
-387	0.1763	0.2994		1.69824	0	0		0	1		0	0.1763	0	0.180825	-0.037296		0	-68.2281
-357	0.2128	0.3519		1.65367	0	0		0	1		0	0.2128	0	0.218261	-0.042034		0	-75.9696
-327	0.2727	0.4084		1.49762	0	0		0	1		0	0.2727	0	0.279699	-0.040481		0	-89.1729
-297	0.3645	0.4695		1.28807	0	0		0	1		0	0.3645	0	0.373855	-0.0300837		0	-108.257
-267	0.4908	0.535		1.09006	0	0		0	1		0	0.4908	0	0.503396	-0.00994048		0	-131.044
-237	0.6333	0.6071		0.958629	1	0.958629		0.000863035	0.998274		0.00054656	0.632753	-0.0418928	0.648993	3.49204e-17		-0.129535	-149.963
-207	0.7637	0.6881		0.901008	1	0.901008		0.00160487	0.99679		0.00122564	0.762474	-0.093943	0.782043	0		-0.253707	-157.832
-177	0.8622	0.7714		0.894688	1	0.894688		0.00168624	0.996628		0.00145387	0.860746	-0.111437	0.882837	0		-0.257336	-152.352
-147	0.9248	0.8488		0.91782	1	0.91782		0.00138843	0.997223		0.00128402	0.923516	-0.0984177	0.947218	-3.49204e-17		-0.188751	-135.757
-117	0.9613	0.9141		0.9509	1	0.9509		0.000962548	0.998075		0.000925298	0.960375	-0.0709224	0.985022	3.49204e-17		-0.10826	-112.364
-87	0.981	0.962		0.980632	1	0.980632		0.000579766	0.99884		0.00056875	0.980431	-0.0435937	1.00559	3.49204e-17		-0.0494813	-85.2975
-57	0.9859	0.9887		1.00284	1	1.00284		0.000293852	0.999412		0.000289709	0.98561	-0.0222057	1.01091	-3.49204e-17		-0.0165134	-56.1798
-27	0.9774	0.9922		1.01514	1	1.01514		0.00013547	0.999729		0.000132408	0.977268	-0.0101488	1.00235	-3.49204e-17		-0.00357502	-26.3862
3	0.9551	0.9713		1.01696	1	1.01696		0.000112047	0.999776		0.000107016	0.954993	-0.00820256	0.979503	3.49204e-17		0.000321047	2.86498
33	0.9161	0.9241		1.00873	1	1.00873		0.000217988	0.999564		0.000199699	0.9159	-0.0153066	0.939407	0		0.00659007	30.2247
63	0.853	0.8524		0.999297	1	0.999297		0.000339472	0.999321		0.000289569	0.85271	-0.022195	0.874595	0		0.0182429	53.7208
93	0.7607	0.7635		1.00368	1	1.00368		0.000283028	0.999434		0.000215299	0.760485	-0.0165023	0.780002	0		0.0200228	70.7251
123	0.6507	0.6674		1.02566	1	1.02566		0	1		0	0.6507	0	0.6674	0		0	80.0361
153	0.5431	0.5713		1.05192	0	0		0	1		0	0.5431	0	0.557038	-0.00448574		0	83.0943
183	0.4535	0.4789		1.05601	0	0		0	1		0	0.4535	0	0.465139	-0.00432833		0	82.9905
213	0.3837	0.3929		1.02398	0	0		2.17268e-05	0.999957		8.33657e-06	0.383692	-0.000638983	0.393539	-1.74602e-17		0.00177569	81.7263
243	0.3247	0.3185		0.980905	0	0		0.000576245	0.998848		0.000187107	0.324513	-0.0143414	0.332841	-1.74602e-17		0.045467	78.8566
273	0.2753	0.2587		0.939702	0	0		0.00110671	0.997787		0.000304678	0.274995	-0.023353	0.282053	1.74602e-17		0.083177	75.0737
303	0.2382	0.2114		0.88749	0	0		0.00177891	0.996442		0.000423737	0.237776	-0.0324787	0.243879	8.73009e-18		0.128392	72.0462
333	0.211	0.1764		0.836019	0	0		0.00244156	0.995117		0.00051517	0.210485	-0.0394869	0.215887	0		0.171552	70.0914
363	0.1891	0.1469		0.776838	0	0		0.00320348	0.993593		0.000605779	0.188494	-0.0464319	0.193332	0		0.219898	68.4234
393	0.167	0.1225		0.733533	0	0		0.003761	0.992478		0.000628088	0.166372	-0.0481418	0.170642	-4.36505e-18		0.246838	65.3842
423	0.1453	0.1065		0.732966	0	0		0.0037683	0.992463		0.000547534	0.144752	-0.0419675	0.148467	4.36505e-18		0.231607	61.2303
453	0.1275	0.0928		0.727843	0	0		0.00383426	0.992331		0.000488868	0.127011	-0.0374708	0.130271	0		0.221457	57.536
483	0.1108	0.0797		0.719314	0	0		0.00394406	0.992112		0.000437002	0.110363	-0.0334954	0.113195	0		0.211072	53.3053
513	0.0956	0.0698		0.730126	0	0		0.00380487	0.99239		0.000363746	0.0952363	-0.0278805	0.0976805	0		0.186602	48.8562
543	0.0844	0.0629		0.745261	0	0		0.00361002	0.99278		0.000304685	0.0840953	-0.0233536	0.0862536	-4.36505e-18		0.165444	45.6638
573	0.0744	0.0577		0.775538	0	0		0.00322022	0.99356		0.000239584	0.0741604	-0.0183637	0.0760637	0		0.137282	42.4939
603	0.0636	0.0533		0.83805	0	0		0.00241541	0.995169		0.00015362	0.0634464	-0.0117747	0.0650747	-4.36505e-18		0.092633	38.2582
633	0.0561	0.0497		0.885918	0	0		0.00179915	0.996402		0.000100932	0.0559991	-0.00773627	0.0574363	0		0.06389	35.4474
663	0.0512	0.047		0.917969	0	0		0.00138651	0.997227		7.09895e-05	0.051129	-0.00544122	0.0524412	0		0.0470661	33.8985
693	0.0468	0.0447		0.955128	0	0		0.000908111	0.998184		4.24996e-05	0.0467575	-0.00325752	0.0479575	2.18252e-18		0.0294522	32.4029
723	0.0428	0.0421		0.983645	0	0		0.000540977	0.998918		2.31538e-05	0.0427768	-0.0017747	0.0438747	0		0.0167402	30.9277
753	0.0385	0.0378		0.981818	0	0		0.000564495	0.998871		2.1733e-05	0.0384783	-0.0016658	0.0394658	-2.18252e-18		0.016365	28.9741
783	0.0349	0.0309		0.885387	0	0		0.00180598	0.996388		6.30289e-05	0.034837	-0.00483105	0.0357311	-1.09126e-18		0.0493516	27.2773
813	0.0333	0.0222		0.666667	0	0		0.00462186	0.990756		0.000153908	0.0331461	-0.0117968	0.0339968	-1.09126e-18		0.125127	26.9478
843	0.0329	0.0106		0.322188	0	0		0.00905679	0.981886		0.000297969	0.032602	-0.0228388	0.0334388	-1.63689e-18		0.251187	27.4835
873	0.0327	-0.01		-0.30581	0	0		0.0171419	0.965716		0.000560539	0.0321395	-0.0429643	0.0329643	-2.72815e-18		0.489351	28.0577
903	0.0326	-0.0446		-1.3681	0	0		0.0308181	0.938364		0.00100467	0.0315953	-0.0770062	0.0324062	-2.18252e-18		0.907218	28.5306
933	0.0328	-0.0865		-2.6372	0	0		0.0471569	0.905686		0.00154675	0.0312533	-0.118555	0.0320554	0		1.44311	29.1593
963	0.0339	-0.1316		-3.88201	0	0		0.063183	0.873634		0.0021419	0.0317581	-0.164173	0.0325732	8.73009e-18		2.06265	30.583
993	0.0365	-0.1796		-4.92055	0	0		0.0765536	0.846893		0.00279421	0.0337058	-0.214171	0.0345708	0		2.77465	33.4699
1023	0.0402	-0.229		-5.69652	0	0		0.0865437	0.826913		0.00347906	0.0367209	-0.266663	0.0376634	-1.74602e-17		3.55907	37.5655
1053	0.0438	-0.2809		-6.41324	0	0		0.095771	0.808458		0.00419477	0.0396052	-0.321522	0.0406217	0		4.41709	41.7043
1083	0.0466	-0.3355		-7.19957	0	0		0.105894	0.788211		0.00493468	0.0416653	-0.378235	0.0427346	0		5.34426	45.1235
1113	0.0485	-0.3965		-8.17526	0	0		0.118456	0.763088		0.00574511	0.0427549	-0.440352	0.0438522	-1.74602e-17		6.3943	47.5862
1143	0.0496	-0.4597		-9.26815	0	0		0.132526	0.734948		0.00657329	0.0430267	-0.503831	0.044131	0		7.51327	49.1795
1173	0.0506	-0.5166		-10.2095	0	0		0.144645	0.71071		0.00731905	0.043281	-0.560992	0.0443917	-3.49204e-17		8.58524	50.7686
1203	0.0515	-0.566		-10.9903	0	0		0.154698	0.690605		0.00796692	0.0435331	-0.61065	0.0446503	-3.49204e-17		9.58421	52.3703
1233	0.0522	-0.6076		-11.6398	0	0		0.16306	0.67388		0.00851174	0.0436883	-0.65241	0.0448095	-3.49204e-17		10.495	53.8676
1263	0.0524	-0.6354		-12.126	0	0		0.169318	0.661363		0.00887229	0.0435277	-0.680045	0.0446448	3.49204e-17		11.2057	54.9755
1293	0.0516	-0.6534		-12.6628	0	0		0.17623	0.64754		0.00909346	0.0425065	-0.696997	0.0435975	-3.49204e-17		11.7578	54.961
1323	0.0499	-0.6644		-13.3146	0	0		0.184622	0.630756		0.00921263	0.0406874	-0.706132	0.0417316	0		12.1883	53.8294
1353	0.048	-0.6665		-13.8854	0	0		0.19197	0.616059		0.00921458	0.0387854	-0.706281	0.0397808	-3.49204e-17		12.4673	52.4767
1383	0.0461	-0.6584		-14.282	0	0		0.197076	0.605848		0.00908521	0.0370148	-0.696365	0.0379648	-3.49204e-17		12.5648	51.1915
1413	0.0441	-0.6398		-14.5079	0	0		0.199985	0.60003		0.00881933	0.0352807	-0.675986	0.0361861	-3.49204e-17		12.4617	49.8516
1443	0.0424	-0.6122		-14.4387	0	0		0.199093	0.601813		0.00844155	0.0339584	-0.64703	0.03483	0		12.1812	49.002
1473	0.0407	-0.5691		-13.9828	0	0		0.193224	0.613552		0.00786422	0.0328358	-0.602778	0.0336785	0		11.584	48.3671
1503	0.0389	-0.5092		-13.09	0	0		0.18173	0.636541		0.00706928	0.0318307	-0.541848	0.0326476	0		10.6251	47.8416
1533	0.0372	-0.4569		-12.2823	0	0		0.171331	0.657339		0.0063735	0.0308265	-0.488518	0.0316176	-3.49204e-17		9.77058	47.257
1563	0.0354	-0.4134		-11.678	0	0		0.163551	0.672898		0.0057897	0.0296103	-0.44377	0.0303702	0		9.0493	46.2809
1593	0.0334	-0.3728		-11.1617	0	0		0.156904	0.686192		0.00524059	0.0281594	-0.401682	0.0288821	1.74602e-17		8.34827	44.8579
1623	0.0315	-0.3376		-10.7175	0	0		0.151185	0.69763		0.00476233	0.0267377	-0.365024	0.0274239	-1.74602e-17		7.72926	43.3952
1653	0.0294	-0.307		-10.4422	0	0		0.147641	0.704718		0.00434064	0.0250594	-0.332702	0.0257025	-1.74602e-17		7.17508	41.4231
1683	0.0266	-0.28		-10.5263	0	0		0.148724	0.702552		0.00395606	0.0226439	-0.303225	0.0232251	1.74602e-17		6.65805	38.1097
1713	0.0237	-0.2556		-10.7848	0	0		0.152052	0.695896		0.00360363	0.0200964	-0.276212	0.0206121	-1.74602e-17		6.17303	34.4251
1743	0.0207	-0.2331		-11.2609	0	0		0.158181	0.683638		0.00327435	0.0174257	-0.250973	0.0178729	8.73009e-18		5.70719	30.3729
1773	0.0178	-0.2111		-11.8596	0	0		0.165889	0.668223		0.00295282	0.0148472	-0.226328	0.0152282	-8.73009e-18		5.23535	26.3241
1803	0.015	-0.1885		-12.5667	0	0		0.174992	0.650015		0.00262488	0.0123751	-0.201193	0.0126927	0		4.73267	22.3123
1833	0.0125	-0.1658		-13.264	0	0		0.18397	0.63206		0.00229963	0.0102004	-0.176262	0.0104622	8.73009e-18		4.21521	18.6973
1863	0.0104	-0.1456		-14	0	0		0.193446	0.613109		0.00201183	0.00838817	-0.154203	0.00860345	0		3.74805	15.6272
1893	0.0085	-0.1295		-15.2353	0	0		0.209349	0.581302		0.00177947	0.00672053	-0.136393	0.00689301	0		3.36853	12.722
1923	0.0072	-0.1177		-16.3472	0	0		0.223664	0.552671		0.00161038	0.00558962	-0.123433	0.00573307	4.36505e-18		3.09677	10.7488
1953	0.0066	-0.1096		-16.6061	0	0		0.226997	0.546006		0.00149818	0.00510182	-0.114833	0.00523276	8.73009e-18		2.92594	9.96386
1983	0.0063	-0.1046		-16.6032	0	0		0.22696	0.546081		0.00142985	0.00487015	-0.109595	0.00499514	-4.36505e-18		2.83538	9.65752
2013	0.0063	-0.1016		-16.127	0	0		0.220829	0.558342		0.00139122	0.00490878	-0.106635	0.00503476	4.36505e-18		2.80053	9.88137
2043	0.0062	-0.0993		-16.0161	0	0		0.219402	0.561196		0.00136029	0.00483971	-0.104264	0.00496392	4.36505e-18		2.77908	9.88752
2073	0.0061	-0.0972		-15.9344	0	0		0.21835	0.5633		0.00133194	0.00476806	-0.10209	0.00489044	0		2.7611	9.8842
2103	0.006	-0.095		-15.8333	0	0		0.217049	0.565903		0.00130229	0.00469771	-0.0998183	0.00481827	-4.36505e-18		2.73872	9.87928
2133	0.006	-0.0927		-15.45	0	0		0.212113	0.575773		0.00127268	0.00472732	-0.0975486	0.00484865	0		2.71463	10.0834
2163	0.0058	-0.0906		-15.6207	0	0		0.214311	0.571378		0.001243	0.004557	-0.095274	0.00467395	0		2.68862	9.85678
2193	0.0058	-0.0884		-15.2414	0	0		0.209427	0.581145		0.00121468	0.00458532	-0.093103	0.004703	0		2.66379	10.0556
2223	0.0057	-0.0863		-15.1404	0	0		0.208127	0.583746		0.00118632	0.00451368	-0.0909295	0.00462952	0		2.6372	10.0339
2253	0.0056	-0.0844		-15.0714	0	0		0.207239	0.585521		0.00116054	0.00443946	-0.0889534	0.0045534	0		2.6147	10.0021
2283	0.0055	-0.083		-15.0909	0	0		0.20749	0.585019		0.0011412	0.0043588	-0.0874707	0.00447067	0		2.60535	9.95115
2313	0.0056	-0.0818		-14.6071	0	0		0.201262	0.597476		0.00112707	0.00447293	-0.0863877	0.00458773	-4.36505e-18		2.60691	10.3459
2343	0.0058	-0.0806		-13.8966	0	0		0.192114	0.615773		0.00111426	0.00468574	-0.085406	0.004806	0		2.61071	10.9787
2373	0.0065	-0.0796		-12.2462	0	0		0.170866	0.658268		0.00111063	0.00538937	-0.0851277	0.00552769	-4.36505e-18		2.63552	12.789
2403	0.0074	-0.0783		-10.5811	0	0		0.149429	0.701142		0.00110578	0.00629422	-0.0847558	0.00645576	-4.36505e-18		2.65718	15.125
2433	0.0082	-0.0767		-9.35366	0	0		0.133627	0.732746		0.00109574	0.00710426	-0.0839866	0.00728659	-4.36505e-18		2.66594	17.2847
2463	0.0092	-0.0744		-8.08696	0	0		0.117319	0.765362		0.00107933	0.00812067	-0.0827291	0.00832908	0		2.6584	20.0012
2493	0.0102	-0.0708		-6.94118	0	0		0.102568	0.794864		0.00104619	0.00915381	-0.0801887	0.00938874	0		2.60816	22.8204
2523	0.011	-0.0665		-6.04545	0	0		0.091036	0.817928		0.0010014	0.0099986	-0.0767552	0.0102552	0		2.52652	25.2265
2553	0.012	-0.062		-5.16667	0	0		0.0797222	0.840556		0.000956666	0.0110433	-0.0733268	0.0113268	2.18252e-18		2.44237	28.1936
2583	0.0131	-0.0574		-4.38168	0	0		0.069616	0.860768		0.00091197	0.012188	-0.0699008	0.0125008	0		2.35562	31.4817
2613	0.0141	-0.053		-3.75887	0	0		0.0615977	0.876805		0.000868527	0.0132315	-0.0665711	0.0135711	-4.36505e-18		2.26946	34.5738
2643	0.015	-0.0493		-3.28667	0	0		0.0555184	0.888963		0.000832776	0.0141672	-0.0638308	0.0145308	-2.18252e-18		2.20103	37.444
2673	0.016	-0.0458		-2.8625	0	0		0.0500576	0.899885		0.000800921	0.0151991	-0.0613892	0.0155892	0		2.14086	40.6271
2703	0.017	-0.0427		-2.51176	0	0		0.0455421	0.908916		0.000774215	0.0162258	-0.0593422	0.0166422	0		2.0927	43.8583
2733	0.0177	-0.0399		-2.25424	0	0		0.0422266	0.915547		0.00074741	0.0169526	-0.0572877	0.0173877	2.18252e-18		2.04267	46.3314
2763	0.018	-0.0373		-2.07222	0	0		0.0398833	0.920233		0.000717899	0.0172821	-0.0550256	0.0177256	0		1.98355	47.7504
2793	0.018	-0.0348		-1.93333	0	0		0.0380952	0.92381		0.000685713	0.0173143	-0.0525587	0.0177587	0		1.9152	48.3588
2823	0.0175	-0.033		-1.88571	0	0		0.0374821	0.925036		0.000655937	0.0168441	-0.0502764	0.0172764	0		1.85171	47.5508
2853	0.0167	-0.033		-1.97605	0	0		0.0386451	0.92271		0.000645373	0.0160546	-0.0494667	0.0164667	-2.18252e-18		1.84125	45.8039
2883	0.0154	-0.0348		-2.25974	0	0		0.0422974	0.915405		0.00065138	0.0147486	-0.0499271	0.0151271	0		1.87793	42.5203
2913	0.0139	-0.0395		-2.84173	0	0		0.0497901	0.90042		0.000692083	0.0132079	-0.0530469	0.0135469	0		2.01604	38.4747
2943	0.0125	-0.0493		-3.944	0	0		0.0639812	0.872038		0.000799765	0.0117002	-0.0613005	0.0120005	2.18252e-18		2.35371	34.4338
2973	0.0112	-0.0658		-5.875	0	0		0.0888415	0.822317		0.000995025	0.010205	-0.0762669	0.0104669	0		2.95821	30.3394
3003	0.0097	-0.0904		-9.31959	0	0		0.133188	0.733623		0.00129193	0.00840807	-0.0990239	0.00862386	0		3.87966	25.2494
3033	0.0084	-0.1216		-14.4762	0	0		0.199576	0.600848		0.00167644	0.00672356	-0.128496	0.00689612	0		5.08464	20.3926
3063	0.0072	-0.1595		-22.1528	0	0		0.298407	0.403186		0.00214853	0.00505147	-0.164681	0.00518111	1.74602e-17		6.58095	15.4726
3093	0.0059	-0.2147		-36.3898	0	0		0.4817	0.0366002		0.00284203	0.00305797	-0.217836	0.00313645	8.73009e-18		8.7904	9.4583
3123	0.0048	-0.2841		-59.1875	0	0		0.775205	-0.55041		0.00372098	0.00107902	-0.285207	0.00110671	1.74602e-17		11.6206	3.36977
3153	0.0039	-0.3466		-88.8718	0	0		1	-1		0.0039	0	-0.298928	0	0.0149945		12.2967	0
3183	0.0034	-0.4146		-121.941	0	0		1	-1		0.0034	0	-0.260604	0	0.0484371		10.8222	0
3213	0.0033	-0.5076		-153.818	0	0		1	-1		0.0033	0	-0.252939	0	0.0800997		10.6029	0
3243	0.0037	-0.6066		-163.946	0	0		1	-1		0.0037	0	-0.283598	0	0.101595		11.9991	0
3273	0.0048	-0.7066		-147.208	0	0		1	-1		0.0048	0	-0.367911	0	0.106529		15.7104	0
3303	0.0067	-0.8327		-124.284	0	0		1	-1		0.0067	0	-0.513543	0	0.100386		22.1301	0
3333	0.0089	-0.9725		-109.27	0	0		1	-1		0.0089	0	-0.682169	0	0.0913191		29.6637	0
3363	0.011	-1.1149		-101.355	0	0		1	-1		0.011	0	-0.84313	0	0.085481		36.993	0
3393	0.0134	-1.3021		-97.1716	0	0		1	-1		0.0134	0	-1.02709	0	0.0865014		45.4662	0
3423	0.0165	-1.5492		-93.8909	0	0		1	-1		0.0165	0	-1.2647	0	0.0894865		56.4795	0
3453	0.0206	-1.8195		-88.3252	0	0		1	-1		0.0206	0	-1.57895	0	0.0756603		71.1318	0
3483	0.0255	-2.0859		-81.8	0	0		1	-1		0.0255	0	-1.95453	0	0.0413206		88.8165	0
3513	0.0307	-2.3531		-76.6482	1	-76.6482		1	-1		0.0307	0	-2.3531	0	0		107.849	0
3543	0.0352	-2.6187		-74.3949	1	-74.3949		0.97099	-0.94198		0.0341788	0.00102115	-2.61975	0.00104736	0		121.096	3.61795
3573	0.0386	-2.8518		-73.8808	1	-73.8808		0.964372	-0.928744		0.0372248	0.00137525	-2.85321	0.00141054	-1.39681e-16		133.004	4.91376
3603	0.0415	-3.0249		-72.8892	1	-72.8892		0.951605	-0.903209		0.0394916	0.00200841	-3.02696	0.00205995	1.39681e-16		142.288	7.23629
3633	0.0443	-3.1266		-70.5779	1	-70.5779		0.921848	-0.843697		0.0408379	0.00346211	-3.13015	0.00355097	1.39681e-16		148.364	12.5779
3663	0.0469	-3.1695		-67.58	1	-67.58		0.883252	-0.766504		0.0414245	0.00547547	-3.17512	0.005616	1.39681e-16		151.738	20.0566
3693	0.0494	-3.1793		-64.3583	1	-64.3583		0.841776	-0.683551		0.0415837	0.00781629	-3.18732	0.00801689	0		153.569	28.8656
3723	0.0514	-3.1706		-61.6848	1	-61.6848		0.807356	-0.614713		0.0414981	0.00990189	-3.18076	0.010156	-1.39681e-16		154.497	36.8647
3753	0.0515	-3.1422		-61.0136	1	-61.0136		0.798715	-0.597429		0.0411338	0.0103662	-3.15283	0.0106322	-1.39681e-16		154.375	38.9043
3783	0.0495	-3.0789		-62.2	1	-62.2		0.813989	-0.627978		0.0402924	0.00920755	-3.08834	0.00944386	0		152.426	34.8322
3813	0.0463	-2.9645		-64.0281	1	-64.0281		0.837524	-0.675048		0.0387774	0.00752263	-2.97222	0.0077157	0		147.858	28.6838
3843	0.043	-2.7914		-64.9163	1	-64.9163		0.848959	-0.697918		0.0365052	0.00649476	-2.79806	0.00666144	0		140.29	24.9594
3873	0.0404	-2.5789		-63.8342	1	-63.8342		0.835028	-0.670055		0.0337351	0.00666489	-2.58574	0.00683594	0		130.656	25.8131
3903	0.0383	-2.3657		-61.7676	1	-61.7676		0.808422	-0.616845		0.0309626	0.00733743	-2.37323	0.00752574	0		120.847	28.638
3933	0.0365	-2.1736		-59.5507	1	-59.5507		0.779881	-0.559761		0.0284656	0.00803436	-2.18184	0.00824056	0		111.955	31.5991
3963	0.0348	-1.9813		-56.9339	1	-56.9339		0.746191	-0.492383		0.0259675	0.00883254	-1.99036	0.00905923	0		102.909	35.0034
3993	0.0331	-1.7477		-52.8006	0	0		0.692978	-0.385956		0.0229376	0.0101624	-1.75812	0.0104233	6.98407e-17		91.5897	40.5786
4023	0.0314	-1.5138		-48.2102	0	0		0.633879	-0.267758		0.0199038	0.0114962	-1.52559	0.0117912	-6.98407e-17		80.073	46.2492
4053	0.0298	-1.3228		-44.3893	0	0		0.584687	-0.169375		0.0174237	0.0123763	-1.33549	0.012694	6.98407e-17		70.6182	50.1612
4083	0.0285	-1.1464		-40.2246	0	0		0.53107	-0.062139		0.0151355	0.0133645	-1.16011	0.0137075	0		61.7982	54.5673
4113	0.028	-0.9827		-35.0964	0	0		0.465048	0.0699036		0.0130213	0.0149787	-0.998063	0.0153631	3.49204e-17		53.5568	61.6072
4143	0.0285	-0.8513		-29.8702	0	0		0.397764	0.204473		0.0113363	0.0171637	-0.868904	0.0176042	3.49204e-17		46.9661	71.1094
4173	0.0294	-0.7541		-25.6497	0	0		0.343427	0.313146		0.0100968	0.0193032	-0.773899	0.0197987	0		42.1338	80.5524
4203	0.0304	-0.6777		-22.2928	0	0		0.300209	0.399581		0.00912637	0.0212736	-0.69952	0.0218196	0		38.3581	89.4131
4233	0.0316	-0.6171		-19.5285	0	0		0.264621	0.470758		0.00836203	0.023238	-0.640934	0.0238344	0		35.3965	98.3663
4263	0.033	-0.5707		-17.2939	0	0		0.235853	0.528294		0.00778314	0.0252169	-0.596564	0.025864	0		33.1795	107.499
4293	0.0348	-0.5314		-15.2701	0	0		0.209797	0.580405		0.00730095	0.027499	-0.559605	0.0282048	0		31.343	118.053
4323	0.0371	-0.4989		-13.4474	0	0		0.186332	0.627337		0.00691291	0.0301871	-0.529862	0.0309618	0		29.8845	130.499
4353	0.0414	-0.4708		-11.372	0	0		0.159612	0.680777		0.00660792	0.0347921	-0.506485	0.035685	-3.49204e-17		28.7643	151.45
4383	0.0488	-0.4452		-9.12295	0	0		0.130657	0.738687		0.00637605	0.042424	-0.488713	0.0435127	-1.74602e-17		27.9462	185.944
4413	0.0571	-0.4233		-7.41331	0	0		0.108646	0.782708		0.0062037	0.0508963	-0.475503	0.0522025	-1.74602e-17		27.3769	224.605
4443	0.0643	-0.4039		-6.28149	0	0		0.0940748	0.81185		0.00604901	0.058251	-0.463646	0.059746	-3.49204e-17		26.8758	258.809
4473	0.0714	-0.3851		-5.39356	0	0		0.0826433	0.834713		0.00590073	0.0654993	-0.45228	0.0671803	1.74602e-17		26.394	292.978
4503	0.0796	-0.366		-4.59799	0	0		0.0724009	0.855198		0.00576311	0.0738369	-0.441732	0.0757319	-1.74602e-17		25.9513	332.488
4533	0.0892	-0.3461		-3.88004	0	0		0.0631578	0.873684		0.00563367	0.0835663	-0.431811	0.085711	-1.74602e-17		25.5374	378.806
4563	0.0993	-0.3242		-3.26485	0	0		0.0552376	0.889525		0.00548509	0.0938149	-0.420423	0.0962226	1.74602e-17		25.0285	428.077
4593	0.1106	-0.2989		-2.70253	0	0		0.0479981	0.904004		0.00530859	0.105291	-0.406894	0.107994	0		24.3823	483.603
4623	0.1238	-0.2715		-2.19305	0	0		0.0414389	0.917122		0.00513013	0.11867	-0.393215	0.121715	0		23.7166	548.611
4653	0.1375	-0.2431		-1.768	0	0		0.0359666	0.928067		0.00494541	0.132555	-0.379057	0.135957	-2.61903e-17		23.011	616.777
4683	0.1502	-0.2108		-1.40346	0	0		0.0312734	0.937453		0.00469727	0.145503	-0.360037	0.149237	-1.74602e-17		21.9973	681.389
4713	0.1593	-0.1763		-1.10672	0	0		0.027453	0.945094		0.00437326	0.154927	-0.335203	0.158903	0		20.6112	730.17
4743	0.164	-0.1473		-0.898171	0	0		0.0247681	0.950464		0.00406197	0.159938	-0.311343	0.164043	0		19.2659	758.586
4773	0.1664	-0.1242		-0.746394	0	0		0.0228141	0.954372		0.00379626	0.162604	-0.290977	0.166777	-8.73009e-18		18.1196	776.108
4803	0.1682	-0.107		-0.636147	0	0		0.0213947	0.957211		0.00359859	0.164601	-0.275826	0.168826	-4.36505e-18		17.2841	790.581
4833	0.1698	-0.095		-0.559482	0	0		0.0204077	0.959185		0.00346523	0.166335	-0.265604	0.170604	0		16.7475	803.896
4863	0.1709	-0.0854		-0.499707	0	0		0.0196382	0.960724		0.00335616	0.167544	-0.257244	0.171844	0		16.321	814.766
4893	0.1711	-0.0762		-0.445354	0	0		0.0189384	0.962123		0.00324036	0.16786	-0.248368	0.172168	4.36505e-18		15.8551	821.337
4923	0.1701	-0.067		-0.393886	0	0		0.0182758	0.963448		0.00310871	0.166991	-0.238277	0.171277	0		15.3042	822.098
4953	0.1683	-0.0575		-0.341652	0	0		0.0176033	0.964793		0.00296264	0.165337	-0.227081	0.169581	-6.54757e-18		14.6739	818.916
4983	0.1661	-0.0488		-0.293799	0	0		0.0169872	0.966026		0.00282158	0.163278	-0.216269	0.167469	-1.09126e-17		14.0599	813.616
5013	0.1633	-0.0409		-0.250459	0	0		0.0164293	0.967141		0.0026829	0.160617	-0.205639	0.164739	-6.54757e-18		13.4494	805.174
5043	0.1597	-0.0331		-0.207264	0	0		0.0158731	0.968254		0.00253494	0.157165	-0.194299	0.161199	2.18252e-18		12.7837	792.583
5073	0.156	-0.0261		-0.167308	0	0		0.0153587	0.969283		0.00239596	0.153604	-0.183646	0.157546	-3.27378e-18		12.1547	779.233
5103	0.1521	-0.0205		-0.13478	0	0		0.01494	0.97012		0.00227237	0.149828	-0.174173	0.153673	3.27378e-18		11.5959	764.57
5133	0.1479	-0.0165		-0.111562	0	0		0.014641	0.970718		0.00216541	0.145735	-0.165975	0.149475	-4.36505e-18		11.1151	748.056
5163	0.1437	-0.0132		-0.091858	0	0		0.0143874	0.971225		0.00206746	0.141633	-0.158467	0.145267	3.27378e-18		10.6743	731.249
5193	0.1394	-0.0102		-0.0731707	0	0		0.0141468	0.971706		0.00197206	0.137428	-0.151155	0.140955	-1.30951e-17		10.2409	713.663
5223	0.1348	-0.0076		-0.0563798	0	0		0.0139306	0.972139		0.00187785	0.132922	-0.143934	0.136334	-7.36601e-18		9.80799	694.252
5253	0.1298	-0.0056		-0.0431433	0	0		0.0137602	0.97248		0.00178607	0.128014	-0.136899	0.131299	1.90971e-18		9.38225	672.457
5283	0.1246	-0.0041		-0.0329053	0	0		0.0136284	0.972743		0.0016981	0.122902	-0.130156	0.126056	2.45534e-18		8.97105	649.291
5313	0.1191	-0.0029		-0.0243493	0	0		0.0135182	0.972964		0.00161002	0.11749	-0.123405	0.120505	0		8.55405	624.224
5343	0.1131	-0.0019		-0.0167993	0	0		0.013421	0.973158		0.00151792	0.111582	-0.116346	0.114446	4.70606e-18		8.11024	596.183
5373	0.1072	-0.0008		-0.00746269	0	0		0.0133008	0.973398		0.00142585	0.105774	-0.109289	0.108489	-2.83046e-18		7.66109	568.325
5403	0.1013	0.0002		0.00197433	0	0		0.0131793	0.973641		0.00133507	0.0999649	-0.10233	0.10253	1.79888e-18		7.21337	540.111
5433	0.0953	0.0009		0.00944386	0	0		0.0130832	0.973834		0.00124683	0.0940532	-0.095567	0.096467	-6.13834e-19		6.77401	510.991
5463	0.0895	0.0012		0.0134078	0	0		0.0130321	0.973936		0.00116638	0.0883336	-0.0894007	0.0906007	-2.25073e-18		6.37192	482.567
5493	0.0836	0.0013		0.0155502	0	0		0.0130046	0.973991		0.00108718	0.0825128	-0.0833305	0.0846305	-1.36408e-18		5.97189	453.243
5523	0.0778	0.0013		0.0167095	0	0		0.0129896	0.974021		0.00101059	0.0767894	-0.0774602	0.0787602	3.00097e-18		5.58151	424.108
5553	0.072	0.0013		0.0180556	0	0		0.0129723	0.974055		0.000934006	0.071066	-0.0715899	0.0728899	-5.72912e-18		5.18653	394.629
5583	0.0662	0.0013		0.0196375	0	0		0.0129519	0.974096		0.000857418	0.0653426	-0.0657196	0.0670196	-1.36408e-18		4.78697	364.808
5613	0.0605	0.0013		0.0214876	0	0		0.0129281	0.974144		0.000782151	0.0597178	-0.0599505	0.0612505	-1.36408e-18		4.39021	335.196
5643	0.0549	0.0013		0.0236794	0	0		0.0128999	0.9742		0.000708205	0.0541918	-0.0542826	0.0555826	-1.36408e-18		3.9964	305.804
5673	0.0492	0.001		0.0203252	0	0		0.0129431	0.974114		0.0006368	0.0485632	-0.0488096	0.0498096	-4.09223e-18		3.61256	275.499
5703	0.0435	0.0004		0.0091954	0	0		0.0130864	0.973827		0.000569257	0.0429307	-0.0436325	0.0440325	-7.67293e-19		3.24647	244.834

## Sheet: Methylpheophorbide-a dioxane
Spreadsheet to evaluate maximum-possible fraction of Qx absorption and Qx-Qy gap by analytical inversion of MCD and ABS data
Source: Reimers, Cai, Kobyashi, Rätsep, Freiberg and Krausz
Enter the observed data in the blue fields incolumns A,B,C as frequency, Absorption/frequency, and MCD Delta Absorption / frequency. Assumes equally spaced in frequency (else replace all sums by integrals)
NOTE: this analysis will only work well if the data has little noise, the band tails are included, there are no interfering transitions, there is only 1 species present (eg no aggregation) and the base line is accurate.
Enter the Magnetic field strength and other factors needed to express B/D in physical units in cell D17
Data filtering parameters entered in cells M12 and O12 eliminates noise due to weak signals; a small relative error in the data inversion usually results because of this
A valid soution is obtained for any rescaling ³1 of the initial Bx/Dx beyond the value that gives maximal Dx absorption, enter a rescaling in cell M13
Yellow boxes contain intermediate and final outupts
									POOR AGREEMENT Qy(0,0) ABS & MCD !!							approx Qx-Qy unperturbed gap: Ex-Ey+lx-ly=
SUM:	24.8794	-56.977			Data Filter: Include in max/min test if relative MCD signal >							0.95	rel abs >	0.03
MAX:	0.9892	1.027			Bx/Dx from min value gives max possible Dx, rescale by (³ 1)							1						2654.3
MIN:	0.0003	-3.9428				Bx/Dx= min value			-50.7417	rescalled	-50.7417	in T^-1 =	-0.0403397			Ave E=	3473.38	819.089
						By/Dy= max value			1.24611			in T^-1 =	0.000990655
Methylpheophorbide-a dioxane						fraction Qx abs =Dx/(Dx+Dy)=			0.0680204		ratio -Bx/By=		2.97196
B/D scaling to units of Tesla^-1			0.000795
Experimental Data:				DA/A				Polarization			Partitioned ABS and MCD						Ave abs energy
n	A/n	DA/n		Raw	Filter	Filtered		fr. X	LD		Ax/n	Ay/n	DAx/n	DAy/n	Rel error		Ax	Ay
-542	0.0472	0.1787		3.78602	0	0		0	1		0	0.0472	0	0.0588162	-0.0304057		0	-25.5824
-512	0.0692	0.2141		3.09393	0	0		0	1		0	0.0692	0	0.0862306	-0.0324311		0	-35.4304
-482	0.1011	0.2628		2.59941	0	0		0	1		0	0.1011	0	0.125981	-0.0347009		0	-48.7302
-452	0.1361	0.3242		2.38207	0	0		0	1		0	0.1361	0	0.169595	-0.0392119		0	-61.5172
-422	0.1733	0.3913		2.25793	0	0		0	1		0	0.1733	0	0.21595	-0.0444734		0	-73.1326
-392	0.22	0.4602		2.09182	0	0		0	1		0	0.22	0	0.274143	-0.0471889		0	-86.24
-362	0.2805	0.5339		1.90339	0	0		0	1		0	0.2805	0	0.349533	-0.0467604		0	-101.541
-332	0.3577	0.6128		1.71317	0	0		0	1		0	0.3577	0	0.445732	-0.0423728		0	-118.756
-302	0.4556	0.6901		1.51471	0	0		0	1		0	0.4556	0	0.567726	-0.0310373		0	-137.591
-272	0.5668	0.7545		1.33116	0	0		0	1		0	0.5668	0	0.706293	-0.0122265		0	-154.17
-242	0.6717	0.8101		1.20604	0	0		0.00077061	0.998459		0.000517619	0.671182	-0.0262649	0.836365	2.81582e-17		-0.125264	-162.426
-212	0.7579	0.8803		1.1615	0	0		0.00162745	0.996745		0.00123345	0.756667	-0.0625873	0.942887	-2.81582e-17		-0.261491	-160.413
-182	0.8278	0.9413		1.13711	0	0		0.00209657	0.995807		0.00173554	0.826064	-0.0880645	1.02936	2.81582e-17		-0.315869	-150.344
-152	0.888	0.9699		1.09223	0	0		0.00295987	0.99408		0.00262836	0.885372	-0.133368	1.10327	0		-0.399511	-134.576
-122	0.9356	0.9887		1.05676	1	1.05676		0.00364223	0.992716		0.00340767	0.932192	-0.172911	1.16161	-2.81582e-17		-0.415736	-113.727
-92	0.9664	1.0067		1.0417	1	1.0417		0.0039318	0.992136		0.00379969	0.9626	-0.192803	1.1995	0		-0.349571	-88.5592
-62	0.9844	1.0206		1.03677	1	1.03677		0.00402658	0.991947		0.00396376	0.980436	-0.201128	1.22173	0		-0.245753	-60.787
-32	0.9892	1.027		1.03821	1	1.03821		0.0039989	0.992002		0.00395571	0.985244	-0.20072	1.22772	0		-0.126583	-31.5278
-2	0.9741	1.0252		1.05246	1	1.05246		0.00372487	0.99255		0.0036284	0.970472	-0.184111	1.20931	0		-0.0072568	-1.94094
28	0.9342	1.0167		1.08831	1	1.08831		0.00303525	0.99393		0.00283553	0.931364	-0.14388	1.16058	0		0.0793948	26.0782
58	0.8709	1.0005		1.14881	1	1.14881		0.0018715	0.996257		0.00162989	0.86927	-0.0827033	1.0832	0		0.0945335	50.4177
88	0.7834	0.9762		1.24611	1	1.24611		0	1		0	0.7834	0	0.9762	0		0	68.9392
118	0.6769	0.9444		1.39518	0	0		0	1		0	0.6769	0	0.84349	-0.0255936		0	79.8742
148	0.5691	0.9048		1.58988	0	0		0	1		0	0.5691	0	0.709159	-0.0496197		0	84.2268
178	0.4706	0.8612		1.83	0	0		0	1		0	0.4706	0	0.586418	-0.0696921		0	83.7668
208	0.3837	0.8181		2.13213	0	0		0	1		0	0.3837	0	0.478131	-0.0862252		0	79.8096
238	0.3137	0.7763		2.47466	0	0		0	1		0	0.3137	0	0.390904	-0.0977469		0	74.6606
268	0.2599	0.7257		2.79223	0	0		0	1		0	0.2599	0	0.323863	-0.101917		0	69.6532
298	0.2178	0.6647		3.05188	0	0		0	1		0	0.2178	0	0.271402	-0.0997509		0	64.9044
328	0.185	0.6087		3.29027	0	0		0	1		0	0.185	0	0.23053	-0.0959141		0	60.68
358	0.1556	0.5583		3.58805	0	0		0	1		0	0.1556	0	0.193894	-0.0924231		0	55.7048
388	0.1275	0.5077		3.98196	0	0		0	1		0	0.1275	0	0.158879	-0.0884705		0	49.47
418	0.1084	0.4578		4.22325	0	0		0	1		0	0.1084	0	0.135078	-0.081851		0	45.3112
448	0.0972	0.4122		4.24074	0	0		0	1		0	0.0972	0	0.121122	-0.0738253		0	43.5456
478	0.0878	0.3682		4.19362	0	0		0	1		0	0.0878	0	0.109408	-0.0656366		0	41.9684
508	0.0785	0.3237		4.12357	0	0		0	1		0	0.0785	0	0.0978194	-0.0572894		0	39.878
538	0.07	0.2791		3.98714	0	0		0	1		0	0.07	0	0.0872275	-0.048664		0	37.66
568	0.063	0.2401		3.81111	0	0		0	1		0	0.063	0	0.0785047	-0.0409849		0	35.784
598	0.058	0.2125		3.66379	0	0		0	1		0	0.058	0	0.0722742	-0.035565		0	34.684
628	0.055	0.1955		3.55455	0	0		0	1		0	0.055	0	0.0685359	-0.0322015		0	34.54
658	0.0531	0.1845		3.47458	0	0		0	1		0	0.0531	0	0.0661683	-0.0300121		0	34.9398
688	0.0514	0.1761		3.42607	0	0		0	1		0	0.0514	0	0.0640499	-0.0284189		0	35.3632
718	0.0498	0.1695		3.40361	0	0		0	1		0	0.0498	0	0.0620561	-0.0272507		0	35.7564
748	0.0485	0.165		3.40206	0	0		0	1		0	0.0485	0	0.0604362	-0.0265202		0	36.278
778	0.0477	0.1616		3.38784	0	0		0	1		0	0.0477	0	0.0594393	-0.0259107		0	37.1106
808	0.0473	0.1568		3.31501	0	0		0	1		0	0.0473	0	0.0589408	-0.0248197		0	38.2184
838	0.047	0.145		3.08511	0	0		0	1		0	0.047	0	0.058567	-0.0219217		0	39.386
868	0.0468	0.1204		2.57265	0	0		0	1		0	0.0468	0	0.0583178	-0.0157457		0	40.6224
898	0.0466	0.0841		1.80472	0	0		0	1		0	0.0466	0	0.0580686	-0.00660227		0	41.8468
928	0.0469	0.0398		0.848614	0	0		0.00764588	0.984708		0.000358592	0.0465414	-0.0181956	0.0579956	0		0.332773	43.1904
958	0.0481	-0.006		-0.12474	0	0		0.0263686	0.947263		0.00126833	0.0468317	-0.0643573	0.0583573	2.19986e-18		1.21506	44.8647
988	0.051	-0.0404		-0.792157	0	0		0.0392066	0.921587		0.00199953	0.0490005	-0.10146	0.0610598	1.75989e-18		1.97554	48.4125
1018	0.0547	-0.0681		-1.24497	0	0		0.0479166	0.904167		0.00262104	0.052079	-0.132996	0.0648959	7.03956e-18		2.66822	53.0164
1048	0.0587	-0.099		-1.68654	0	0		0.0564103	0.887179		0.00331128	0.0553887	-0.16802	0.0690203	3.51978e-18		3.47023	58.0474
1078	0.0635	-0.1236		-1.94646	0	0		0.0614098	0.87718		0.00389952	0.0596005	-0.197869	0.0742686	3.51978e-18		4.20369	64.2493
1108	0.0706	-0.1377		-1.95042	0	0		0.0614862	0.877028		0.00434092	0.0662591	-0.220266	0.0825659	0		4.80974	73.4151
1138	0.0779	-0.1488		-1.91014	0	0		0.0607113	0.878577		0.00472941	0.0731706	-0.239978	0.0911784	7.03956e-18		5.38207	83.2681
1168	0.0842	-0.1578		-1.87411	0	0		0.0600182	0.879964		0.00505353	0.0791465	-0.256425	0.0986249	0		5.90253	92.4431
1198	0.0908	-0.1624		-1.78855	0	0		0.0583724	0.883255		0.00530021	0.0854998	-0.268942	0.106542	1.40791e-17		6.34965	102.429
1228	0.0969	-0.1632		-1.68421	0	0		0.0563654	0.887269		0.00546181	0.0914382	-0.277142	0.113942	0		6.70711	112.286
1258	0.1015	-0.1611		-1.58719	0	0		0.0544993	0.891001		0.00553168	0.0959683	-0.280687	0.119587	0		6.95885	120.728
1288	0.1051	-0.1541		-1.46622	0	0		0.0521724	0.895655		0.00548332	0.0996167	-0.278233	0.124133	2.11187e-17		7.06251	128.306
1318	0.1082	-0.1417		-1.30961	0	0		0.0491599	0.90168		0.00531911	0.102881	-0.269901	0.128201	1.40791e-17		7.01058	135.597
1348	0.11	-0.1273		-1.15727	0	0		0.0462297	0.907541		0.00508526	0.104915	-0.258035	0.130735	-2.11187e-17		6.85493	141.425
1378	0.109	-0.1094		-1.00367	0	0		0.0432751	0.91345		0.00471698	0.104283	-0.239348	0.129948	0		6.5	143.702
1408	0.104	-0.0869		-0.835577	0	0		0.0400418	0.919916		0.00416434	0.0998357	-0.211306	0.124406	0		5.86339	140.569
1438	0.0985	-0.0632		-0.641624	0	0		0.036311	0.927378		0.00357664	0.0949234	-0.181485	0.118285	7.03956e-18		5.1432	136.5
1468	0.0941	-0.0406		-0.431456	0	0		0.0322684	0.935463		0.00303645	0.0910635	-0.154075	0.113475	0		4.45751	133.681
1498	0.0891	-0.0199		-0.223345	0	0		0.0282653	0.943469		0.00251844	0.0865816	-0.12779	0.10789	0		3.77262	129.699
1528	0.0838	-0.004		-0.0477327	0	0		0.0248874	0.950225		0.00208556	0.0817144	-0.105825	0.101825	-4.39972e-18		3.18674	124.86
1558	0.0777	0.0051		0.0656371	0	0		0.0227067	0.954587		0.00176431	0.0759357	-0.089524	0.094624	1.75989e-18		2.74879	118.308
1588	0.0706	0.0094		0.133144	0	0		0.0214081	0.957184		0.00151141	0.0690886	-0.0766918	0.0860918	-2.19986e-18		2.40013	109.713
1618	0.0631	0.0122		0.193344	0	0		0.0202502	0.9595		0.00127779	0.0618222	-0.0648371	0.0770371	4.39972e-19		2.06746	100.028
1648	0.0558	0.0141		0.252688	0	0		0.0191087	0.961783		0.00106626	0.0547337	-0.0541041	0.0682041	2.19986e-18		1.7572	90.2012
1678	0.0487	0.0149		0.305955	0	0		0.0180841	0.963832		0.000880695	0.0478193	-0.044688	0.059588	8.79945e-19		1.47781	80.2408
1708	0.0422	0.0144		0.341232	0	0		0.0174055	0.965189		0.000734512	0.0414655	-0.0372704	0.0516704	8.79945e-19		1.25455	70.8231
1738	0.0371	0.0135		0.363881	0	0		0.0169698	0.96606		0.000629581	0.0364704	-0.031946	0.045446	1.31992e-18		1.09421	63.3856
1768	0.0328	0.0124		0.378049	0	0		0.0166973	0.966605		0.000547672	0.0322523	-0.0277898	0.0401898	2.19986e-18		0.968285	57.0221
1798	0.0289	0.0113		0.391003	0	0		0.0164481	0.967104		0.000475351	0.0284246	-0.0241201	0.0354201	1.31992e-18		0.854682	51.1075
1828	0.0252	0.01		0.396825	0	0		0.0163362	0.967328		0.000411671	0.0247883	-0.0208889	0.0308889	-4.39972e-19		0.752535	45.3131
1858	0.0218	0.0087		0.399083	0	0		0.0162927	0.967415		0.000355182	0.0214448	-0.0180225	0.0267225	8.79945e-19		0.659928	39.8445
1888	0.0184	0.0075		0.407609	0	0		0.0161287	0.967743		0.000296769	0.0181032	-0.0150586	0.0225586	8.79945e-19		0.560299	34.1789
1918	0.0152	0.0063		0.414474	0	0		0.0159967	0.968007		0.00024315	0.0149569	-0.0123378	0.0186378	-4.39972e-19		0.466361	28.6872
1948	0.0121	0.005		0.413223	0	0		0.0160207	0.967959		0.000193851	0.0119061	-0.00983633	0.0148363	2.19986e-19		0.377622	23.1932
1978	0.0093	0.0037		0.397849	0	0		0.0163165	0.967367		0.000151743	0.00914826	-0.0076997	0.0113997	-2.19986e-19		0.300148	18.0953
2008	0.007	0.0024		0.342857	0	0		0.0173743	0.965251		0.00012162	0.00687838	-0.0061712	0.0085712	1.09993e-19		0.244212	13.8118
2038	0.005	0.0015		0.3	0	0		0.0181986	0.963603		9.09931e-05	0.00490901	-0.00461715	0.00611715	1.09993e-19		0.185444	10.0046
2068	0.0033	0.0012		0.363636	0	0		0.0169746	0.966051		5.6016e-05	0.00324398	-0.00284235	0.00404235	-5.49966e-20		0.115841	6.70856
2098	0.0017	0.0015		0.882353	0	0		0.0069969	0.986006		1.18947e-05	0.00168811	-0.000603559	0.00210356	5.49966e-20		0.0249552	3.54164
2128	0.0006	0.0022		3.66667	0	0		0	1		0	0.0006	0	0.000747664	-0.000368351		0	1.2768
2158	0.0003	0.0038		12.6667	0	0		0	1		0	0.0003	0	0.000373832	-0.000868968		0	0.6474
2188	0.0008	0.0062		7.75	0	0		0	1		0	0.0008	0	0.000996885	-0.00131965		0	1.7504
2218	0.0017	0.009		5.29412	0	0		0	1		0	0.0017	0	0.00211838	-0.00174536		0	3.7706
2248	0.0028	0.0117		4.17857	0	0		0	1		0	0.0028	0	0.0034891	-0.00208251		0	6.2944
2278	0.0038	0.0138		3.63158	0	0		0	1		0	0.0038	0	0.00473521	-0.00229908		0	8.6564
2308	0.0048	0.0156		3.25	0	0		0	1		0	0.0048	0	0.00598131	-0.00243956		0	11.0784
2338	0.0057	0.0171		3	0	0		0	1		0	0.0057	0	0.00710281	-0.00253556		0	13.3266
2368	0.0064	0.0186		2.90625	0	0		0	1		0	0.0064	0	0.00797508	-0.00269476		0	15.1552
2398	0.0072	0.0202		2.80556	0	0		0	1		0	0.0072	0	0.00897197	-0.00284773		0	17.2656
2428	0.0079	0.0217		2.74684	0	0		0	1		0	0.0079	0	0.00984424	-0.00300694		0	19.1812
2458	0.0086	0.0229		2.66279	0	0		0	1		0	0.0086	0	0.0107165	-0.00309006		0	21.1388
2488	0.0093	0.0235		2.52688	0	0		0	1		0	0.0093	0	0.0115888	-0.003021		0	23.1384
2518	0.0101	0.0231		2.28713	0	0		0	1		0	0.0101	0	0.0125857	-0.00266671		0	25.4318
2548	0.0108	0.0218		2.01852	0	0		0	1		0	0.0108	0	0.013458	-0.00211577		0	27.5184
2578	0.0116	0.0199		1.71552	0	0		0	1		0	0.0116	0	0.0144548	-0.00138104		0	29.9048
2608	0.0124	0.0177		1.42742	0	0		0	1		0	0.0124	0	0.0154517	-0.000570223		0	32.3392
2638	0.0134	0.0147		1.09701	0	0		0.00286782	0.994264		3.84288e-05	0.0133616	-0.00194994	0.0166499	4.39972e-19		0.101375	35.2478
2668	0.0143	0.0104		0.727273	0	0		0.00997991	0.98004		0.000142713	0.0141573	-0.00724149	0.0176415	-4.39972e-19		0.380758	37.7716
2698	0.0151	0.0052		0.344371	0	0		0.0173451	0.96531		0.000261912	0.0148381	-0.0132898	0.0184898	0		0.706637	40.0332
2728	0.0159	-0.0018		-0.113208	0	0		0.0261468	0.947706		0.000415734	0.0154843	-0.021095	0.019295	1.09993e-19		1.13412	42.2411
2758	0.0164	-0.011		-0.670732	0	0		0.0368709	0.926258		0.000604683	0.0157953	-0.0306827	0.0196827	0		1.66772	43.5635
2788	0.0163	-0.0224		-1.37423	0	0		0.0504029	0.899194		0.000821568	0.0154784	-0.0416878	0.0192878	0		2.29053	43.1539
2818	0.0156	-0.0376		-2.41026	0	0		0.0703311	0.859338		0.00109717	0.0145028	-0.0556721	0.0180721	-1.75989e-18		3.09181	40.869
2848	0.0146	-0.062		-4.24658	0	0		0.105653	0.788694		0.00154254	0.0130575	-0.078271	0.016271	0		4.39315	37.1877
2878	0.0136	-0.0956		-7.02941	0	0		0.159182	0.681636		0.00216487	0.0114351	-0.109849	0.0142494	0		6.2305	32.9103
2908	0.0127	-0.1362		-10.7244	0	0		0.230256	0.539488		0.00292425	0.00977575	-0.148382	0.0121816	7.03956e-18		8.50373	28.4279
2938	0.0118	-0.1914		-16.2203	0	0		0.335972	0.328056		0.00396447	0.00783553	-0.201164	0.00976391	0		11.6476	23.0208
2968	0.0108	-0.2653		-24.5648	0	0		0.49648	0.00703983		0.00536198	0.00543802	-0.272076	0.00677635	0		15.9144	16.14
2998	0.0099	-0.3644		-36.8081	0	0		0.731983	-0.463965		0.00724663	0.00265337	-0.367706	0.00330638	1.40791e-17		21.7254	7.95481
3028	0.0094	-0.5038		-53.5957	0	0		1	-1		0.0094	0	-0.476972	0	0.00680425		28.4632	0
3058	0.0098	-0.6621		-67.5612	0	0		1	-1		0.0098	0	-0.497269	0	0.0418056		29.9684	0
3088	0.0111	-0.8342		-75.1532	0	0		1	-1		0.0111	0	-0.563233	0	0.0687245		34.2768	0
3118	0.013	-1.0259		-78.9154	0	0		1	-1		0.013	0	-0.659642	0	0.0928928		40.534	0
3148	0.0147	-1.2337		-83.9252	0	0		1	-1		0.0147	0	-0.745903	0	0.123718		46.2756	0
3178	0.0163	-1.463		-89.7546	0	0		1	-1		0.0163	0	-0.82709	0	0.161284		51.8014	0
3208	0.0176	-1.7238		-97.9432	0	0		1	-1		0.0176	0	-0.893054	0	0.210699		56.4608	0
3238	0.0192	-2.0446		-106.49	0	0		1	-1		0.0192	0	-0.974241	0	0.271472		62.1696	0
3268	0.022	-2.3433		-106.514	0	0		1	-1		0.022	0	-1.11632	0	0.311196		71.896	0
3298	0.0272	-2.6309		-96.7243	0	0		1	-1		0.0272	0	-1.38017	0	0.317218		89.7056	0
3328	0.0347	-2.9113		-83.8991	0	0		1	-1		0.0347	0	-1.76074	0	0.291813		115.482	0
3358	0.0436	-3.169		-72.6835	0	0		1	-1		0.0436	0	-2.21234	0	0.242635		146.409	0
3388	0.0546	-3.4549		-63.2766	0	0		1	-1		0.0546	0	-2.7705	0	0.173583		184.985	0
3418	0.0667	-3.6832		-55.2204	0	0		1	-1		0.0667	0	-3.38447	0	0.0757652		227.981	0
3448	0.0755	-3.831		-50.7417	1	-50.7417		1	-1		0.0755	0	-3.831	0	0		260.324	0
3478	0.0807	-3.9228		-48.6097	1	-48.6097		0.958989	-0.917979		0.0773904	0.00330956	-3.92692	0.00412407	1.12633e-16		269.164	11.5107
3508	0.0847	-3.9428		-46.5502	1	-46.5502		0.919374	-0.838749		0.077871	0.00682898	-3.95131	0.00850964	0		273.172	23.9561
3538	0.0882	-3.898		-44.195	1	-44.195		0.874072	-0.748144		0.0770932	0.0111068	-3.91184	0.0138403	0		272.756	39.296
3568	0.0906	-3.7844		-41.7704	1	-41.7704		0.827435	-0.654869		0.0749656	0.0156344	-3.80388	0.0194822	0		267.477	55.7836
3598	0.0904	-3.5912		-39.7257	0	0		0.788103	-0.576206		0.0712445	0.0191555	-3.61507	0.0238698	0		256.338	68.9214
3628	0.0877	-3.3496		-38.1938	0	0		0.758638	-0.517276		0.0665326	0.0211674	-3.37598	0.0263769	0		241.38	76.7955
3658	0.0838	-3.0957		-36.9415	0	0		0.73455	-0.469099		0.0615552	0.0222448	-3.12342	0.0277193	-1.12633e-16		225.169	81.3713
3688	0.0795	-2.8047		-35.2792	0	0		0.702575	-0.40515		0.0558547	0.0236453	-2.83416	0.0294645	0		205.992	87.2038
3718	0.075	-2.4917		-33.2227	0	0		0.663016	-0.326032		0.0497262	0.0252738	-2.52319	0.0314938	0		184.882	93.9679
3748	0.0702	-2.2142		-31.5413	0	0		0.630675	-0.26135		0.0442734	0.0259266	-2.24651	0.0323073	1.12633e-16		165.937	97.173
3778	0.0653	-1.9229		-29.4472	0	0		0.590393	-0.180787		0.0385527	0.0267473	-1.95623	0.03333	5.63165e-17		145.652	101.051
3808	0.0602	-1.6055		-26.6694	0	0		0.536963	-0.0739261		0.0323252	0.0278748	-1.64024	0.034735	0		123.094	106.147
3838	0.0556	-1.3457		-24.2032	0	0		0.489525	0.0209499		0.0272176	0.0283824	-1.38107	0.0353675	0		104.461	108.932
3868	0.0515	-1.1585		-22.4951	0	0		0.456669	0.0866611		0.0235185	0.0279815	-1.19337	0.034868	5.63165e-17		90.9695	108.233
3898	0.0479	-1.0037		-20.9541	0	0		0.427026	0.145947		0.0204546	0.0274454	-1.0379	0.0341999	0		79.7319	106.982
3928	0.0448	-0.8633		-19.2701	0	0		0.394635	0.210731		0.0176796	0.0271204	-0.897095	0.0337949	5.63165e-17		69.4456	106.529
3958	0.0422	-0.7546		-17.8815	0	0		0.367925	0.26415		0.0155264	0.0266736	-0.787838	0.0332381	0		61.4536	105.574
3988	0.0396	-0.6743		-17.0278	0	0		0.351503	0.296994		0.0139195	0.0256805	-0.706301	0.0320006	2.81582e-17		55.5111	102.414
4018	0.037	-0.6048		-16.3459	0	0		0.338388	0.323224		0.0125204	0.0244796	-0.635304	0.0305043	2.81582e-17		50.3068	98.3592
4048	0.0344	-0.5413		-15.7355	0	0		0.326645	0.34671		0.0112366	0.0231634	-0.570164	0.0288641	2.81582e-17		45.4857	93.7655
4078	0.0321	-0.4843		-15.0872	0	0		0.314176	0.371648		0.0100851	0.0220149	-0.511733	0.027433	-1.40791e-17		41.1268	89.777
4108	0.0305	-0.435		-14.2623	0	0		0.298308	0.403383		0.0090984	0.0214016	-0.461669	0.0266687	0		37.3762	87.9178
4138	0.0306	-0.3954		-12.9216	0	0		0.272519	0.454962		0.00833908	0.0222609	-0.423139	0.0277395	1.40791e-17		34.5071	92.1157
4168	0.0323	-0.3645		-11.2848	0	0		0.241036	0.517928		0.00778546	0.0245145	-0.395048	0.0305477	0		32.4498	102.177
4198	0.0351	-0.3375		-9.61538	0	0		0.208924	0.582153		0.00733322	0.0277668	-0.3721	0.0346004	0		30.7849	116.565
4228	0.0387	-0.3139		-8.11111	0	0		0.179989	0.640023		0.00696556	0.0317344	-0.353444	0.0395445	0		29.4504	134.173
4258	0.0435	-0.2915		-6.70115	0	0		0.152868	0.694265		0.00664974	0.0368503	-0.337419	0.0459194	0		28.3146	156.908
4288	0.05	-0.2652		-5.304	0	0		0.125993	0.748014		0.00629965	0.0437003	-0.319655	0.0544553	0		27.0129	187.387
4318	0.0573	-0.2411		-4.20768	0	0		0.104905	0.79019		0.00601106	0.0512889	-0.305011	0.0639115	7.03956e-18		25.9558	221.466
4348	0.0643	-0.2225		-3.46034	0	0		0.0905298	0.81894		0.00582107	0.0584789	-0.295371	0.072871	7.03956e-18		25.31	254.266
4378	0.0708	-0.2052		-2.89831	0	0		0.0797189	0.840562		0.0056441	0.0651559	-0.286391	0.0811912	7.03956e-18		24.7099	285.253
4408	0.0767	-0.1898		-2.47458	0	0		0.0715683	0.856863		0.00548929	0.0712107	-0.278536	0.0887361	1.40791e-17		24.1968	313.897
4438	0.0824	-0.1766		-2.1432	0	0		0.0651943	0.869611		0.00537201	0.077028	-0.272585	0.0959851	7.03956e-18		23.841	341.85
4468	0.088	-0.1651		-1.87614	0	0		0.0600572	0.879886		0.00528503	0.082715	-0.268172	0.103072	7.03956e-18		23.6135	369.57
4498	0.0935	-0.1567		-1.67594	0	0		0.0562063	0.887587		0.00525529	0.0882447	-0.266662	0.109962	0		23.6383	396.925
4528	0.0985	-0.1494		-1.51675	0	0		0.0531443	0.893711		0.00523472	0.0932653	-0.265618	0.116218	7.03956e-18		23.7028	422.305
4558	0.1025	-0.1428		-1.39317	0	0		0.0507672	0.898466		0.00520364	0.0972964	-0.264042	0.121242	-7.03956e-18		23.7182	443.477
4588	0.1054	-0.1395		-1.32353	0	0		0.0494276	0.901145		0.00520967	0.10019	-0.264348	0.124848	1.40791e-17		23.902	459.673
4618	0.1075	-0.1403		-1.30512	0	0		0.0490735	0.901853		0.0052754	0.102225	-0.267683	0.127383	0		24.3618	472.073
4648	0.1095	-0.1436		-1.31142	0	0		0.0491946	0.901611		0.00538681	0.104113	-0.273336	0.129736	7.03956e-18		25.0379	483.918
4678	0.1113	-0.1472		-1.32255	0	0		0.0494088	0.901182		0.0054992	0.105801	-0.279039	0.131839	0		25.7253	494.936
4708	0.1128	-0.1506		-1.33511	0	0		0.0496503	0.900699		0.00560056	0.107199	-0.284182	0.133582	1.40791e-17		26.3674	504.695
4738	0.1135	-0.1521		-1.34009	0	0		0.0497462	0.900508		0.00564619	0.107854	-0.286497	0.134397	-7.03956e-18		26.7516	511.011
4768	0.1134	-0.1479		-1.30423	0	0		0.0490565	0.901887		0.005563	0.107837	-0.282276	0.134376	2.11187e-17		26.5244	514.167
4798	0.1123	-0.1381		-1.22974	0	0		0.0476236	0.904753		0.00534813	0.106952	-0.271373	0.133273	0		25.6603	513.155
4828	0.1094	-0.1258		-1.14991	0	0		0.046088	0.907824		0.00504203	0.104358	-0.255841	0.130041	0		24.3429	503.84
4858	0.1039	-0.1115		-1.07315	0	0		0.0446115	0.910777		0.00463513	0.0992649	-0.235195	0.123695	0		22.5175	482.229
4888	0.097	-0.0975		-1.00515	0	0		0.0433036	0.913393		0.00420045	0.0927995	-0.213138	0.115638	0		20.5318	453.604
4918	0.0901	-0.085		-0.943396	0	0		0.0421157	0.915769		0.00379462	0.0863054	-0.192546	0.107546	1.05593e-17		18.662	424.45
4948	0.0841	-0.0731		-0.869203	0	0		0.0406886	0.918623		0.00342191	0.0806781	-0.173634	0.100534	3.51978e-18		16.9316	399.195
4978	0.0791	-0.0621		-0.785082	0	0		0.0390705	0.921859		0.00309047	0.0760095	-0.156816	0.094716	7.03956e-18		15.3844	378.375
5008	0.0746	-0.0507		-0.679625	0	0		0.037042	0.925916		0.00276333	0.0718367	-0.140216	0.0895162	-1.75989e-18		13.8388	359.758
5038	0.0702	-0.0401		-0.571225	0	0		0.0349569	0.930086		0.00245397	0.067746	-0.124519	0.0844188	0		12.3631	341.304
5068	0.0657	-0.0293		-0.445967	0	0		0.0325475	0.934905		0.00213837	0.0635616	-0.108505	0.0792046	8.79945e-18		10.8373	322.13
5098	0.0604	-0.0201		-0.332781	0	0		0.0303703	0.939259		0.00183437	0.0585656	-0.093079	0.072979	-1.75989e-18		9.35161	298.568
5128	0.0548	-0.0154		-0.281022	0	0		0.0293747	0.941251		0.00160974	0.0531903	-0.0816807	0.0662807	-2.63983e-18		8.25472	272.76
5158	0.0494	-0.013		-0.263158	0	0		0.0290311	0.941938		0.00143414	0.0479659	-0.0727706	0.0597706	-1.31992e-18		7.39728	247.408
5188	0.0439	-0.0112		-0.255125	0	0		0.0288766	0.942247		0.00126768	0.0426323	-0.0643244	0.0531244	3.07981e-18		6.57674	221.176
5218	0.0385	-0.0094		-0.244156	0	0		0.0286656	0.942669		0.00110363	0.0373964	-0.0559999	0.0465999	-1.31992e-18		5.75872	195.134
5248	0.0335	-0.0077		-0.229851	0	0		0.0283904	0.943219		0.00095108	0.0325489	-0.0482594	0.0405594	2.19986e-18		4.99127	170.817
5278	0.0292	-0.0064		-0.219178	0	0		0.0281852	0.94363		0.000823006	0.028377	-0.0417608	0.0353608	1.09993e-18		4.34383	149.774
5308	0.0257	-0.0055		-0.214008	0	0		0.0280857	0.943829		0.000721802	0.0249782	-0.0366255	0.0311255	1.31992e-18		3.83133	132.584
5338	0.0223	-0.0051		-0.2287	0	0		0.0283683	0.943263		0.000632613	0.0216674	-0.0320999	0.0269999	8.79945e-19		3.37689	115.661
5368	0.0189	-0.0047		-0.248677	0	0		0.0287526	0.942495		0.000543424	0.0183566	-0.0275743	0.0228743	2.19986e-19		2.9171	98.5381
5398	0.0157	-0.0043		-0.273885	0	0		0.0292375	0.941525		0.000459028	0.015241	-0.0232919	0.0189919	-4.39972e-19		2.47783	82.2708
5428	0.0128	-0.004		-0.3125	0	0		0.0299802	0.94004		0.000383747	0.0124163	-0.019472	0.015472	4.39972e-19		2.08298	67.3954
5458	0.0107	-0.004		-0.373832	0	0		0.03116	0.93768		0.000333412	0.0103666	-0.0169179	0.0129179	0		1.81976	56.5808
5488	0.0094	-0.0045		-0.478723	0	0		0.0331776	0.933645		0.000311869	0.00908813	-0.0158248	0.0113248	-2.19986e-19		1.71154	49.8757
5518	0.0082	-0.0053		-0.646341	0	0		0.0364018	0.927196		0.000298494	0.00790151	-0.0151461	0.00984612	-2.19986e-19		1.64709	43.6005

## Sheet: Pheo-a EtOH MeOH 1.7 K
Spreadsheet to evaluate maximum-possible fraction of Qx absorption and Qx-Qy gap by analytical inversion of MCD and ABS data
Source: Reimers, Cai, Kobyashi, Rätsep, Freiberg and Krausz
Enter the observed data in the blue fields incolumns A,B,C as frequency, Absorption/frequency, and MCD Delta Absorption / frequency. Assumes equally spaced in frequency (else replace all sums by integrals)
NOTE: this analysis will only work well if the data has little noise, the band tails are included, there are no interfering transitions, there is only 1 species present (eg no aggregation) and the base line is accurate.
Enter the Magnetic field strength and other factors needed to express B/D in physical units in cell D17
Data filtering parameters entered in cells M12 and O12 eliminates noise due to weak signals; a small relative error in the data inversion usually results because of this
A valid soution is obtained for any rescaling ³1 of the initial Bx/Dx beyond the value that gives maximal Dx absorption, enter a rescaling in cell M13
Yellow boxes contain intermediate and final outupts
																approx Qx-Qy unperturbed gap: Ex-Ey+lx-ly=
SUM:	28.0509	-13.5323			Data Filter: Include in max/min test if relative MCD signal >							0.5	rel abs >	0.03
MAX:	1.0382	0.9772			Bx/Dx from min value gives max possible Dx, rescale by (³ 1)							1						2220.11
MIN:	0.0139	-1.384				Bx/Dx= min value			-8.9902	rescalled	-8.9902	in T^-1 =	-0.00323647			Ave E=	3436.99	1216.88
						By/Dy= max value			1.02919			in T^-1 =	0.000370509
Pheo-a EtOH/MeOH 1.7 K						fraction Qx abs =Dx/(Dx+Dy)=			0.150869		ratio -Bx/By=		1.55202
B/D scaling to units of Tesla^-1			0.00036
Experimental Data:				DA/A				Polarization			Partitioned ABS and MCD						Ave abs energy
n	A/n	DA/n		Raw	Filter	Filtered		fr. X	LD		Ax/n	Ay/n	DAx/n	DAy/n	Rel error		Ax	Ay
-625	0.0306	0.0138		0.45098	0	0		0.0577094	0.884581		0.00176591	0.0288341	-0.0158758	0.0296758	0		-1.10369	-18.0213
-595	0.0408	0.0298		0.730392	0	0		0.0298223	0.940355		0.00121675	0.0395833	-0.0109388	0.0407388	0		-0.723965	-23.552
-565	0.0521	0.0264		0.506718	0	0		0.0521464	0.895707		0.00271683	0.0493832	-0.0244248	0.0508248	0		-1.53501	-27.9015
-535	0.0645	0.0121		0.187597	0	0		0.0839967	0.832007		0.00541779	0.0590822	-0.048707	0.060807	-5.01365e-18		-2.89852	-31.609
-505	0.0776	0.0013		0.0167526	0	0		0.101048	0.797904		0.00784133	0.0697587	-0.0704951	0.0717951	-3.13353e-18		-3.95987	-35.2281
-475	0.0914	-0.0006		-0.00656455	0	0		0.103375	0.793249		0.0094485	0.0819515	-0.0849439	0.0843439	7.59882e-18		-4.48804	-38.927
-445	0.1067	0.0071		0.0665417	0	0		0.0960788	0.807842		0.0102516	0.0964484	-0.092164	0.099264	-3.76024e-18		-4.56197	-42.9195
-415	0.1256	0.0319		0.253981	0	0		0.0773712	0.845258		0.00971782	0.115882	-0.0873651	0.119265	0		-4.0329	-48.0911
-385	0.1509	0.0727		0.481776	0	0		0.0546358	0.890728		0.00824454	0.142655	-0.07412	0.14682	1.00273e-17		-3.17415	-54.9224
-355	0.1862	0.1178		0.632653	0	0		0.0395772	0.920846		0.00736928	0.178831	-0.0662513	0.184051	1.00273e-17		-2.6161	-63.4849
-325	0.2358	0.1674		0.709924	0	0		0.0318651	0.93627		0.0075138	0.228286	-0.0675505	0.234951	0		-2.44199	-74.193
-295	0.3033	0.2378		0.784042	0	0		0.0244676	0.951065		0.00742103	0.295879	-0.0667165	0.304517	0		-2.1892	-87.2843
-265	0.391	0.3372		0.862404	0	0		0.0166466	0.966707		0.00650882	0.384491	-0.0585156	0.395716	0		-1.72484	-101.89
-235	0.4975	0.4576		0.919799	0	0		0.0109182	0.978164		0.00543182	0.492068	-0.0488331	0.506433	-8.02184e-17		-1.27648	-115.636
-205	0.6179	0.585		0.946755	1	0.946755		0.00822782	0.983544		0.00508397	0.612816	-0.0457059	0.630706	-8.02184e-17		-1.04221	-125.627
-175	0.7431	0.704		0.947383	1	0.947383		0.0081652	0.98367		0.00606756	0.737032	-0.0545486	0.758549	-8.02184e-17		-1.06182	-128.981
-145	0.8605	0.8111		0.942592	1	0.942592		0.00864338	0.982713		0.00743763	0.853062	-0.0668657	0.877966	8.02184e-17		-1.07846	-123.694
-115	0.9562	0.9024		0.943736	1	0.943736		0.00852919	0.982942		0.00815561	0.948044	-0.0733206	0.975721	0		-0.937895	-109.025
-85	1.0181	0.9601		0.943031	1	0.943031		0.0085995	0.982801		0.00875515	1.00934	-0.0787106	1.03881	8.02184e-17		-0.744188	-85.7943
-55	1.0382	0.9772		0.941244	1	0.941244		0.00877782	0.982444		0.00911314	1.02909	-0.0819289	1.05913	0		-0.501223	-56.5998
-25	1.0145	0.9616		0.947856	1	0.947856		0.00811794	0.983764		0.00823565	1.00626	-0.0740401	1.03564	0		-0.205891	-25.1566
5	0.9513	0.9121		0.958793	1	0.958793		0.00702634	0.985947		0.00668416	0.944616	-0.0600919	0.972192	0		0.0334208	4.72308
35	0.8583	0.8315		0.968775	1	0.968775		0.00603005	0.98794		0.00517559	0.853124	-0.0465296	0.87803	0		0.181146	29.8594
65	0.7479	0.737		0.985426	1	0.985426		0.00436823	0.991264		0.003267	0.744633	-0.029371	0.766371	0		0.212355	48.4011
95	0.633	0.6391		1.00964	1	1.00964		0.00195184	0.996096		0.00123552	0.631764	-0.0111075	0.650208	0		0.117374	60.0176
125	0.5241	0.5394		1.02919	1	1.02919		0	1		0	0.5241	0	0.5394	0		0	65.5125
155	0.428	0.4431		1.03528	0	0		0	1		0	0.428	0	0.440495	-0.00188254		0	66.34
185	0.3476	0.3555		1.02273	0	0		0.000645312	0.998709		0.00022431	0.347376	-0.00201659	0.357517	4.01092e-17		0.0414974	64.2645
215	0.2827	0.2796		0.989034	0	0		0.00400809	0.991984		0.00113309	0.281567	-0.0101867	0.289787	0		0.243614	60.5369
245	0.2314	0.2231		0.964131	0	0		0.00649356	0.987013		0.00150261	0.229897	-0.0135088	0.236609	0		0.36814	56.3249
275	0.191	0.1884		0.986387	0	0		0.00427226	0.991455		0.000816002	0.190184	-0.00733602	0.195736	0		0.224401	52.3006
305	0.1591	0.1617		1.01634	0	0		0.00128261	0.997435		0.000204063	0.158896	-0.00183457	0.163535	2.00546e-17		0.0622393	48.4633
335	0.1339	0.1361		1.01643	0	0		0.0012738	0.997452		0.000170562	0.133729	-0.00153339	0.137633	0		0.0571384	44.7994
365	0.1141	0.1184		1.03769	0	0		0	1		0	0.1141	0	0.117431	-0.000700209		0	41.6465
395	0.0986	0.1086		1.10142	0	0		0	1		0	0.0986	0	0.101478	-0.00514565		0	38.947
425	0.087	0.0984		1.13103	0	0		0	1		0	0.087	0	0.0895398	-0.00640189		0	36.975
455	0.0788	0.0871		1.10533	0	0		0	1		0	0.0788	0	0.0811004	-0.00433497		0	35.854
485	0.0732	0.0807		1.10246	0	0		0	1		0	0.0732	0	0.0753369	-0.00387506		0	35.502
515	0.0697	0.0819		1.17504	0	0		0	1		0	0.0697	0	0.0717347	-0.00734484		0	35.8955
545	0.0677	0.0865		1.2777	0	0		0	1		0	0.0677	0	0.0696764	-0.0121558		0	36.8965
575	0.0669	0.0913		1.36472	0	0		0	1		0	0.0669	0	0.068853	-0.0162189		0	38.4675
605	0.0668	0.0959		1.43563	0	0		0	1		0	0.0668	0	0.0687501	-0.019617		0	40.414
635	0.0669	0.0921		1.37668	0	0		0	1		0	0.0669	0	0.068853	-0.016797		0	42.4815
665	0.0671	0.0771		1.14903	0	0		0	1		0	0.0671	0	0.0690588	-0.00581008		0	44.6215
695	0.0671	0.068		1.01341	0	0		0.00157495	0.99685		0.000105679	0.0669943	-0.000950079	0.0689501	1.00273e-17		0.0734472	46.5611
725	0.0667	0.0726		1.08846	0	0		0	1		0	0.0667	0	0.0686472	-0.00285609		0	48.3575
755	0.066	0.0797		1.20758	0	0		0	1		0	0.066	0	0.0679267	-0.0085067		0	49.83
785	0.0654	0.083		1.26911	0	0		0	1		0	0.0654	0	0.0673092	-0.0113373		0	51.339
815	0.0649	0.0827		1.27427	0	0		0	1		0	0.0649	0	0.0667946	-0.0114923		0	52.8935
845	0.065	0.071		1.09231	0	0		0	1		0	0.065	0	0.0668975	-0.00296421		0	54.925
875	0.0661	0.0477		0.721634	0	0		0.0306964	0.938607		0.00202903	0.064071	-0.0182414	0.0659414	5.01365e-18		1.7754	56.0621
905	0.0683	0.026		0.380673	0	0		0.0647264	0.870547		0.00442082	0.0638792	-0.039744	0.065744	-7.52048e-18		4.00084	57.8107
935	0.0717	0.0134		0.18689	0	0		0.0840673	0.831865		0.00602763	0.0656724	-0.0541895	0.0675895	1.12807e-17		5.63583	61.4037
965	0.0759	0.0086		0.113307	0	0		0.0914114	0.817177		0.00693812	0.0689619	-0.0623751	0.0709751	7.52048e-18		6.69529	66.5482
995	0.0808	0.0081		0.100248	0	0		0.0927148	0.81457		0.00749135	0.0733086	-0.0673487	0.0754487	7.52048e-18		7.4539	72.9421
1025	0.0861	0.0113		0.131243	0	0		0.0896212	0.820758		0.00771639	0.0783836	-0.0693719	0.0806719	-6.26706e-18		7.9093	80.3432
1055	0.092	0.0182		0.197826	0	0		0.0829758	0.834048		0.00763377	0.0843662	-0.0686291	0.0868291	-5.01365e-18		8.05363	89.0064
1085	0.0982	0.0229		0.233198	0	0		0.0794455	0.841109		0.00780155	0.0903985	-0.0701374	0.0930374	2.50683e-18		8.46468	98.0823
1115	0.1048	0.022		0.209924	0	0		0.0817684	0.836463		0.00856933	0.0962307	-0.0770399	0.0990399	-5.01365e-18		9.5548	107.297
1145	0.1118	0.0192		0.171735	0	0		0.0855798	0.82884		0.00956783	0.102232	-0.0860166	0.105217	-2.50683e-18		10.9552	117.056
1175	0.1188	0.0164		0.138047	0	0		0.0889421	0.822116		0.0105663	0.108234	-0.0949933	0.111393	-2.50683e-18		12.4154	127.175
1205	0.1252	0.0108		0.086262	0	0		0.0941106	0.811779		0.0117826	0.113417	-0.105928	0.116728	-7.52048e-18		14.1981	136.668
1235	0.1307	0.0012		0.00918133	0	0		0.101804	0.796392		0.0133058	0.117394	-0.119621	0.120821	1.48843e-17		16.4326	144.982
1265	0.1348	-0.0047		-0.0348665	0	0		0.1062	0.7876		0.0143158	0.120484	-0.128702	0.124002	3.13353e-18		18.1094	152.413
1295	0.1374	-0.0003		-0.00218341	0	0		0.102938	0.794124		0.0141437	0.123256	-0.127155	0.126855	3.79941e-18		18.3161	159.617
1325	0.1384	0.0052		0.0375723	0	0		0.0989702	0.80206		0.0136975	0.124703	-0.123143	0.128343	-2.50683e-18		18.1492	165.231
1355	0.1378	0.0031		0.0224964	0	0		0.100475	0.79905		0.0138454	0.123955	-0.124473	0.127573	4.07359e-18		18.7606	167.958
1385	0.1358	0.0004		0.00294551	0	0		0.102426	0.795148		0.0139095	0.121891	-0.125049	0.125449	-1.17899e-17		19.2646	168.818
1415	0.1326	0.0068		0.0512821	0	0		0.0976018	0.804796		0.012942	0.119658	-0.116351	0.123151	1.0654e-17		18.3129	169.316
1445	0.1281	0.0224		0.174863	0	0		0.0852676	0.829465		0.0109228	0.117177	-0.098198	0.120598	-7.52048e-18		15.7834	169.321
1475	0.1221	0.0363		0.297297	0	0		0.0730479	0.853904		0.00891915	0.113181	-0.0801849	0.116485	0		13.1557	166.942
1505	0.1146	0.0412		0.359511	0	0		0.0668386	0.866323		0.0076597	0.10694	-0.0688622	0.110062	0		11.5278	160.945
1535	0.1055	0.0452		0.428436	0	0		0.0599594	0.880081		0.00632572	0.0991743	-0.0568695	0.102069	0		9.70998	152.233
1565	0.0951	0.0513		0.539432	0	0		0.0488813	0.902237		0.00464861	0.0904514	-0.0417919	0.0930919	-5.01365e-18		7.27508	141.556
1595	0.0839	0.0505		0.601907	0	0		0.0426459	0.914708		0.00357799	0.080322	-0.0321668	0.0826668	-5.01365e-18		5.7069	128.114
1625	0.0726	0.0416		0.573003	0	0		0.0455307	0.908939		0.00330553	0.0692945	-0.0297174	0.0713174	1.00273e-17		5.37149	112.604
1655	0.0616	0.0292		0.474026	0	0		0.0554093	0.889181		0.00341321	0.0581868	-0.0306854	0.0598854	0		5.64886	96.2991
1685	0.0517	0.0161		0.311412	0	0		0.0716392	0.856722		0.00370375	0.0479963	-0.0332974	0.0493974	-1.25341e-17		6.24081	80.8737
1715	0.0431	0.0047		0.109049	0	0		0.0918364	0.816327		0.00395815	0.0391419	-0.0355845	0.0402845	-3.13353e-18		6.78822	67.1283
1745	0.036	-0.0054		-0.15	0	0		0.117691	0.764618		0.00423688	0.0317631	-0.0380904	0.0326904	-1.25341e-18		7.39335	55.4266
1775	0.0303	-0.0134		-0.442244	0	0		0.146859	0.706282		0.00444983	0.0258502	-0.0400048	0.0266048	-6.26706e-18		7.89844	45.8841
1805	0.0259	-0.0111		-0.428571	0	0		0.145494	0.709011		0.0037683	0.0221317	-0.0338778	0.0227778	3.76024e-18		6.80179	39.9477
1835	0.0224	0.0059		0.263393	0	0		0.0764318	0.847136		0.00171207	0.0206879	-0.0153919	0.0212919	3.13353e-18		3.14165	37.9623
1865	0.0197	0.0261		1.32487	0	0		0	1		0	0.0197	0	0.0202751	-0.00420874		0	36.7405
1895	0.0175	0.0364		2.08	0	0		0	1		0	0.0175	0	0.0180109	-0.0132869		0	33.1625
1925	0.0159	0.0348		2.18868	0	0		0	1		0	0.0159	0	0.0163642	-0.0133207		0	30.6075
1955	0.0148	0.0255		1.72297	0	0		0	1		0	0.0148	0	0.0152321	-0.00741904		0	28.934
1985	0.0141	0.0124		0.879433	0	0		0.014947	0.970106		0.000210753	0.0138892	-0.00189471	0.0142947	-1.25341e-18		0.418345	27.5702
2015	0.0139	-0.0023		-0.165468	0	0		0.119235	0.76153		0.00165736	0.0122426	-0.0149	0.0126	0		3.33959	24.6689
2045	0.0141	-0.0143		-1.01418	0	0		0.203942	0.592115		0.00287559	0.0112244	-0.0258521	0.0115521	0		5.88057	22.9539
2075	0.0144	-0.0187		-1.29861	0	0		0.23233	0.53534		0.00334555	0.0110544	-0.0300772	0.0113772	0		6.94202	22.938
2105	0.0148	-0.016		-1.08108	0	0		0.210619	0.578762		0.00311716	0.0116828	-0.0280239	0.0120239	-2.50683e-18		6.56163	24.5924
2135	0.0153	-0.0123		-0.803922	0	0		0.182957	0.634087		0.00279924	0.0125008	-0.0251657	0.0128657	1.25341e-18		5.97637	26.6891
2165	0.0159	-0.0123		-0.773585	0	0		0.179929	0.640142		0.00286087	0.0130391	-0.0257198	0.0134198	0		6.19378	28.2297
2195	0.0164	-0.0144		-0.878049	0	0		0.190355	0.61929		0.00312182	0.0132782	-0.0280658	0.0136658	1.25341e-18		6.8524	29.1456
2225	0.0171	-0.0168		-0.982456	0	0		0.200776	0.598449		0.00343326	0.0136667	-0.0308657	0.0140657	0		7.63901	30.4085
2255	0.018	-0.0188		-1.04444	0	0		0.206962	0.586075		0.00372532	0.0142747	-0.0334914	0.0146914	2.50683e-18		8.40061	32.1894
2285	0.019	-0.0225		-1.18421	0	0		0.220912	0.558176		0.00419733	0.0148027	-0.0377348	0.0152348	2.50683e-18		9.5909	33.8241
2315	0.0201	-0.0297		-1.47761	0	0		0.250195	0.499609		0.00502893	0.0150711	-0.045211	0.015511	2.50683e-18		11.642	34.8895
2345	0.0214	-0.0331		-1.54673	0	0		0.257094	0.485813		0.00550181	0.0158982	-0.0494623	0.0163623	0		12.9017	37.2813
2375	0.0229	-0.026		-1.13537	0	0		0.216038	0.567925		0.00494726	0.0179527	-0.0444768	0.0184768	0		11.7497	42.6378
2405	0.0244	-0.0151		-0.618852	0	0		0.164486	0.671029		0.00401345	0.0203866	-0.0360817	0.0209817	-1.25341e-18		9.65234	49.0297
2435	0.0261	-0.014		-0.536398	0	0		0.156256	0.687488		0.00407829	0.0220217	-0.0366646	0.0226646	-3.76024e-18		9.93063	53.6229
2465	0.0279	-0.0268		-0.960573	0	0		0.198592	0.602817		0.00554071	0.0223593	-0.049812	0.023012	-2.50683e-18		13.6578	55.1157
2495	0.0298	-0.0421		-1.41275	0	0		0.243722	0.512556		0.00726291	0.0225371	-0.065295	0.023195	5.01365e-18		18.121	56.23
2525	0.0318	-0.0473		-1.48742	0	0		0.251174	0.497651		0.00798735	0.0238127	-0.0718078	0.0245078	-5.01365e-18		20.1681	60.1269
2555	0.0337	-0.0395		-1.17211	0	0		0.219704	0.560592		0.00740402	0.026296	-0.0665636	0.0270636	5.01365e-18		18.9173	67.1862
2585	0.0357	-0.0266		-0.745098	0	0		0.177086	0.645829		0.00632196	0.029378	-0.0568357	0.0302357	0		16.3423	75.9422
2615	0.0377	-0.0216		-0.572944	0	0		0.159904	0.680193		0.00602837	0.0316716	-0.0541962	0.0325962	0		15.7642	82.8213
2645	0.0397	-0.0301		-0.758186	0	0		0.178392	0.643216		0.00708216	0.0326178	-0.06367	0.03357	-7.52048e-18		18.7323	86.2742
2675	0.0415	-0.0428		-1.03133	0	0		0.205653	0.588694		0.0085346	0.0329654	-0.0767278	0.0339278	0		22.8301	88.1824
2705	0.0432	-0.0472		-1.09259	0	0		0.211768	0.576464		0.00914838	0.0340516	-0.0822457	0.0350457	0		24.7464	92.1096
2735	0.0448	-0.0437		-0.975446	0	0		0.200076	0.599848		0.00896341	0.0358366	-0.0805828	0.0368828	-5.01365e-18		24.5149	98.0131
2765	0.0461	-0.0399		-0.86551	0	0		0.189104	0.621793		0.00871768	0.0373823	-0.0783736	0.0384736	-5.01365e-18		24.1044	103.362
2795	0.0471	-0.0404		-0.857749	0	0		0.188329	0.623342		0.0088703	0.0382297	-0.0797457	0.0393457	1.00273e-17		24.7925	106.852
2825	0.0477	-0.0506		-1.0608	0	0		0.208595	0.582811		0.00994996	0.03775	-0.0894521	0.0388521	0		28.1086	106.644
2855	0.0479	-0.0729		-1.52192	0	0		0.254618	0.490765		0.0121962	0.0357038	-0.109646	0.0367461	-1.00273e-17		34.8201	101.934
2885	0.0481	-0.0988		-2.05405	0	0		0.307728	0.384544		0.0148017	0.0332983	-0.13307	0.0342704	0		42.703	96.0655
2915	0.0481	-0.1144		-2.37838	0	0		0.340098	0.319805		0.0163587	0.0317413	-0.147068	0.0326679	0		47.6856	92.5259
2945	0.0482	-0.1179		-2.44606	0	0		0.346853	0.306295		0.0167183	0.0314817	-0.150301	0.0324007	0		49.2354	92.7136
2975	0.0485	-0.1313		-2.70722	0	0		0.372918	0.254164		0.0180865	0.0304135	-0.162601	0.0313013	0		53.8074	90.4801
3005	0.049	-0.1647		-3.36122	0	0		0.438192	0.123616		0.0214714	0.0275286	-0.193032	0.0283322	0		64.5216	82.7234
3035	0.0498	-0.1934		-3.88353	0	0		0.490322	0.019356		0.024418	0.025382	-0.219523	0.0261229	0		74.1087	77.0343
3065	0.0509	-0.2075		-4.07662	0	0		0.509593	-0.0191866		0.0259383	0.0249617	-0.23319	0.0256904	-2.00546e-17		79.5009	76.5076
3095	0.0524	-0.231		-4.4084	0	0		0.542707	-0.0854135		0.0284378	0.0239622	-0.255662	0.0246617	0		88.0151	74.1629
3125	0.0546	-0.2773		-5.07875	0	0		0.609613	-0.219226		0.0332849	0.0213151	-0.299237	0.0219374	-4.01092e-17		104.015	66.6098
3155	0.0577	-0.3336		-5.78163	0	0		0.679764	-0.359528		0.0392224	0.0184776	-0.352617	0.019017	0		123.747	58.2968
3185	0.062	-0.3896		-6.28387	0	0		0.729891	-0.459782		0.0452533	0.0167467	-0.406836	0.0172356	0		144.132	53.3384
3215	0.0677	-0.4479		-6.61595	0	0		0.763035	-0.52607		0.0516575	0.0160425	-0.464411	0.0165109	-4.01092e-17		166.079	51.5767
3245	0.0746	-0.5165		-6.92359	0	0		0.79374	-0.587479		0.059213	0.015387	-0.532336	0.0158362	-8.02184e-17		192.146	49.9309
3275	0.0823	-0.6028		-7.32442	0	0		0.833745	-0.66749		0.0686172	0.0136828	-0.616882	0.0140822	8.02184e-17		224.721	44.8111
3305	0.0907	-0.6999		-7.71665	1	-7.71665		0.872892	-0.745783		0.0791713	0.0115287	-0.711765	0.0118653	-8.02184e-17		261.661	38.1024
3335	0.0993	-0.7911		-7.96677	1	-7.96677		0.897855	-0.79571		0.089157	0.010143	-0.801539	0.0104391	0		297.339	33.8268
3365	0.1083	-0.8735		-8.06556	1	-8.06556		0.907715	-0.81543		0.0983056	0.00999445	-0.883786	0.0102862	0		330.798	33.6313
3395	0.1174	-0.9602		-8.17888	1	-8.17888		0.919025	-0.83805		0.107894	0.00950647	-0.969984	0.00978399	0		366.299	32.2745
3425	0.1268	-1.056		-8.32808	1	-8.32808		0.933916	-0.867832		0.118421	0.00837944	-1.06462	0.00862406	-1.60437e-16		405.59	28.6996
3455	0.136	-1.1488		-8.44706	1	-8.44706		0.945791	-0.891583		0.128628	0.00737237	-1.15639	0.00758759	-1.60437e-16		444.408	25.4715
3485	0.1445	-1.2259		-8.48374	1	-8.48374		0.949452	-0.898904		0.137196	0.00730417	-1.23342	0.0075174	-1.60437e-16		478.127	25.455
3515	0.1514	-1.289		-8.51387	1	-8.51387		0.95246	-0.904919		0.144202	0.00719761	-1.29641	0.00740773	0		506.871	25.2996
3545	0.1555	-1.3455		-8.65273	1	-8.65273		0.966319	-0.932638		0.150263	0.00523739	-1.35089	0.00539029	0		532.681	18.5666
3575	0.1561	-1.384		-8.86611	1	-8.86611		0.987616	-0.975231		0.154167	0.00193321	-1.38599	0.00198965	0		551.146	6.91123
3605	0.153	-1.3755		-8.9902	1	-8.9902		1	-1		0.153	0	-1.3755	0	0		551.565	0
3635	0.146	-1.3089		-8.96507	1	-8.96507		0.997492	-0.994984		0.145634	0.000366153	-1.30928	0.000376842	0		529.379	1.33097
3665	0.1359	-1.2031		-8.85283	1	-8.85283		0.98629	-0.972581		0.134037	0.00186315	-1.20502	0.00191754	0		491.245	6.82845
3695	0.1237	-1.0772		-8.70816	1	-8.70816		0.971851	-0.943703		0.120218	0.00348197	-1.08078	0.00358362	0		444.206	12.8659
3725	0.1111	-0.9356		-8.42124	1	-8.42124		0.943215	-0.886429		0.104791	0.00630885	-0.942093	0.00649302	-8.02184e-17		390.347	23.5005
3755	0.0992	-0.792		-7.98387	1	-7.98387		0.899562	-0.799124		0.0892366	0.00996343	-0.802254	0.0102543	0		335.083	37.4127
3785	0.0888	-0.6702		-7.5473	0	0		0.855989	-0.711979		0.0760119	0.0127881	-0.683361	0.0131615	0		287.705	48.4031
3815	0.0801	-0.5746		-7.17353	0	0		0.818685	-0.637371		0.0655767	0.0145233	-0.589547	0.0149473	8.02184e-17		250.175	55.4064
3845	0.0733	-0.4917		-6.70805	0	0		0.772227	-0.544454		0.0566042	0.0166958	-0.508883	0.0171832	-4.01092e-17		217.643	64.1952
3875	0.068	-0.4135		-6.08088	0	0		0.709632	-0.419263		0.048255	0.019745	-0.433821	0.0203215	-4.01092e-17		186.988	76.5121
3905	0.0642	-0.3429		-5.34112	0	0		0.635799	-0.271597		0.0408183	0.0233817	-0.366964	0.0240643	0		159.395	91.3056
3935	0.0618	-0.2852		-4.61489	0	0		0.563316	-0.126632		0.0348129	0.0269871	-0.312975	0.0277749	-4.01092e-17		136.989	106.194
3965	0.0606	-0.2416		-3.9868	0	0		0.500628	-0.00125698		0.0303381	0.0302619	-0.272745	0.0311453	-4.01092e-17		120.291	119.988
3995	0.0603	-0.2088		-3.46269	0	0		0.448319	0.103363		0.0270336	0.0332664	-0.243038	0.0342375	2.00546e-17		107.999	132.899
4025	0.0608	-0.1851		-3.04441	0	0		0.406572	0.186856		0.0247196	0.0360804	-0.222234	0.0371337	-4.01092e-17		99.4962	145.224
4055	0.0619	-0.1716		-2.77221	0	0		0.379405	0.24119		0.0234852	0.0384148	-0.211136	0.0395363	2.00546e-17		95.2324	155.772
4085	0.0634	-0.1652		-2.60568	0	0		0.362784	0.274433		0.0230005	0.0403995	-0.206779	0.0415789	0		93.957	165.032
4115	0.0654	-0.1567		-2.39602	0	0		0.341859	0.316282		0.0223576	0.0430424	-0.200999	0.044299	0		92.0014	177.12
4145	0.0681	-0.1405		-2.06314	0	0		0.308635	0.38273		0.0210181	0.0470819	-0.188956	0.0484564	-2.00546e-17		87.1198	195.155
4175	0.0712	-0.1234		-1.73315	0	0		0.275699	0.448601		0.0196298	0.0515702	-0.176476	0.0530757	-1.00273e-17		81.9544	215.306
4205	0.0748	-0.1139		-1.52273	0	0		0.254698	0.490604		0.0190514	0.0557486	-0.171276	0.057376	2.00546e-17		80.1112	234.423
4235	0.0786	-0.1096		-1.3944	0	0		0.24189	0.516219		0.0190126	0.0595874	-0.170927	0.0613269	2.00546e-17		80.5183	252.353
4265	0.0829	-0.1018		-1.22799	0	0		0.225281	0.549438		0.0186758	0.0642242	-0.167899	0.0660991	-1.00273e-17		79.6523	273.916
4295	0.0879	-0.0868		-0.987486	0	0		0.201278	0.597445		0.0176923	0.0702077	-0.159057	0.0722573	-2.00546e-17		75.9884	301.542
4325	0.0938	-0.0723		-0.770789	0	0		0.17965	0.6407		0.0168512	0.0769488	-0.151495	0.0791952	-1.00273e-17		72.8813	332.804
4355	0.1003	-0.0675		-0.672981	0	0		0.169888	0.660224		0.0170398	0.0832602	-0.153191	0.0856908	-1.00273e-17		74.2082	362.598
4385	0.1075	-0.0666		-0.619535	0	0		0.164554	0.670893		0.0176895	0.0898105	-0.159032	0.0924323	-1.00273e-17		77.5686	393.819
4415	0.1152	-0.0591		-0.513021	0	0		0.153923	0.692154		0.0177319	0.0974681	-0.159413	0.100313	-1.00273e-17		78.2864	430.322
4445	0.1233	-0.0465		-0.377129	0	0		0.14036	0.71928		0.0173064	0.105994	-0.155588	0.109088	2.00546e-17		76.9269	471.142
4475	0.1314	-0.036		-0.273973	0	0		0.130064	0.739871		0.0170905	0.11431	-0.153647	0.117647	5.01365e-18		76.4798	511.535
4505	0.1387	-0.0356		-0.256669	0	0		0.128337	0.743325		0.0178004	0.1209	-0.160029	0.124429	5.01365e-18		80.1908	544.653
4535	0.1449	-0.0524		-0.361629	0	0		0.138813	0.722374		0.020114	0.124786	-0.180829	0.128429	4.01092e-17		91.217	565.904
4565	0.1498	-0.0799		-0.533378	0	0		0.155955	0.688091		0.023362	0.126438	-0.210029	0.130129	0		106.648	577.189
4595	0.1531	-0.0981		-0.640758	0	0		0.166672	0.666656		0.0255175	0.127583	-0.229407	0.131307	1.00273e-17		117.253	586.242
4625	0.1547	-0.0981		-0.634131	0	0		0.16601	0.667979		0.0256818	0.129018	-0.230885	0.132785	-1.00273e-17		118.778	596.709
4655	0.1548	-0.0932		-0.602067	0	0		0.16281	0.674379		0.025203	0.129597	-0.22658	0.13338	0		117.32	603.274
4685	0.1529	-0.0908		-0.593852	0	0		0.16199	0.676019		0.0247683	0.128132	-0.222672	0.131872	-1.00273e-17		116.04	600.297
4715	0.149	-0.0841		-0.56443	0	0		0.159054	0.681892		0.023699	0.125301	-0.213059	0.128959	1.00273e-17		111.741	590.794
4745	0.1444	-0.0739		-0.511773	0	0		0.153798	0.692403		0.0222085	0.122192	-0.199659	0.125759	0		105.379	579.799
4775	0.1404	-0.067		-0.477208	0	0		0.150349	0.699303		0.0211089	0.119291	-0.189774	0.122774	1.00273e-17		100.795	569.615
4805	0.1368	-0.0653		-0.477339	0	0		0.150362	0.699277		0.0205695	0.116231	-0.184924	0.119624	-1.00273e-17		98.8363	558.488
4835	0.1332	-0.0677		-0.508258	0	0		0.153448	0.693105		0.0204392	0.112761	-0.183753	0.116053	-1.00273e-17		98.8236	545.198
4865	0.1297	-0.0729		-0.562066	0	0		0.158818	0.682364		0.0205987	0.109101	-0.185186	0.112286	-2.00546e-17		100.213	530.778
4895	0.1262	-0.0764		-0.605388	0	0		0.163142	0.673716		0.0205885	0.105612	-0.185095	0.108695	1.00273e-17		100.781	516.968
4925	0.1227	-0.0637		-0.519152	0	0		0.154535	0.69093		0.0189614	0.103739	-0.170467	0.106767	2.00546e-17		93.3851	510.912
4955	0.1194	-0.0335		-0.28057	0	0		0.130723	0.738554		0.0156083	0.103792	-0.140322	0.106822	-1.00273e-17		77.3391	514.288
4985	0.116	-0.0098		-0.0844828	0	0		0.111152	0.777696		0.0128936	0.103106	-0.115916	0.106116	-2.50683e-18		64.2748	513.985
5015	0.1123	-0.0027		-0.0240427	0	0		0.10512	0.789761		0.0118049	0.100495	-0.106129	0.103429	-5.64036e-18		59.2018	503.983
5045	0.1082	0.0034		0.0314233	0	0		0.0995839	0.800832		0.010775	0.097425	-0.0968691	0.100269	3.13353e-19		54.3598	491.509
5075	0.1038	0.0141		0.135838	0	0		0.0891626	0.821675		0.00925508	0.0945449	-0.083205	0.097305	1.25341e-18		46.9695	479.815
5105	0.0993	0.0164		0.165156	0	0		0.0862365	0.827527		0.00856328	0.0907367	-0.0769856	0.0933856	-2.50683e-18		43.7156	463.211
5135	0.0945	0.0069		0.0730159	0	0		0.0954327	0.809135		0.00901839	0.0854816	-0.0810771	0.0879771	-7.52048e-18		46.3094	438.948
5165	0.0897	-0.0074		-0.0824972	0	0		0.110954	0.778092		0.00995256	0.0797474	-0.0894755	0.0820755	-2.50683e-18		51.405	411.896
5195	0.0849	-0.0241		-0.283863	0	0		0.131052	0.737897		0.0111263	0.0737737	-0.100027	0.0759274	-7.52048e-18		57.801	383.255
5225	0.0802	-0.0376		-0.468828	0	0		0.149512	0.700976		0.0119909	0.0682091	-0.1078	0.0702003	5.01365e-18		62.6523	356.393
5255	0.0754	-0.0397		-0.526525	0	0		0.155271	0.689458		0.0117074	0.0636926	-0.105252	0.065552	0		61.5225	334.705
5285	0.0718	-0.0299		-0.416435	0	0		0.144283	0.711434		0.0103595	0.0614405	-0.0931341	0.0632341	-7.52048e-18		54.7501	324.713
5315	0.0701	-0.0176		-0.25107	0	0		0.127779	0.744443		0.00895728	0.0611427	-0.0805277	0.0629277	-2.25614e-17		47.6079	324.974
5345	0.0695	-0.0116		-0.166906	0	0		0.119378	0.761243		0.0082968	0.0612032	-0.0745899	0.0629899	0		44.3464	327.131
5375	0.0687	-0.0107		-0.15575	0	0		0.118265	0.76347		0.0081248	0.0605752	-0.0730436	0.0623436	-6.26706e-18		43.6708	325.592
5405	0.0678	-0.0162		-0.238938	0	0		0.126568	0.746865		0.00858129	0.0592187	-0.0771475	0.0609475	5.01365e-18		46.3819	320.077
5435	0.0669	-0.0282		-0.421525	0	0		0.144791	0.710418		0.00968652	0.0572135	-0.0870837	0.0588837	2.50683e-18		52.6462	310.955
5465	0.0664	-0.0315		-0.474398	0	0		0.150068	0.699864		0.00996452	0.0564355	-0.089583	0.058083	0		54.4561	308.42
5495	0.0664	-0.0238		-0.358434	0	0		0.138494	0.723012		0.00919601	0.057204	-0.0826739	0.0588739	1.00273e-17		50.5321	314.336
5525	0.0668	-0.0218		-0.326347	0	0		0.135292	0.729417		0.00903749	0.0577625	-0.0812488	0.0594488	0		49.9321	319.138
5555	0.0675	-0.0302		-0.447407	0	0		0.147374	0.705251		0.00994776	0.0575522	-0.0894324	0.0592324	2.50683e-18		55.2598	319.703
5585	0.0684	-0.0372		-0.54386	0	0		0.157001	0.685998		0.0107389	0.0576611	-0.0965444	0.0593444	0		59.9765	322.037

## Sheet: Pyromethylpheophorbide
Spreadsheet to evaluate maximum-possible fraction of Qx absorption and Qx-Qy gap by analytical inversion of MCD and ABS data
Source: Reimers, Cai, Kobyashi, Rätsep, Freiberg and Krausz
Enter the observed data in the blue fields incolumns A,B,C as frequency, Absorption/frequency, and MCD Delta Absorption / frequency. Assumes equally spaced in frequency (else replace all sums by integrals)
NOTE: this analysis will only work well if the data has little noise, the band tails are included, there are no interfering transitions, there is only 1 species present (eg no aggregation) and the base line is accurate.
Enter the Magnetic field strength and other factors needed to express B/D in physical units in cell D17
Data filtering parameters entered in cells M12 and O12 eliminates noise due to weak signals; a small relative error in the data inversion usually results because of this
A valid soution is obtained for any rescaling ³1 of the initial Bx/Dx beyond the value that gives maximal Dx absorption, enter a rescaling in cell M13
Yellow boxes contain intermediate and final outupts
									POOR AGREEMENT Qy(0,0) ABS & MCD !!							approx Qx-Qy unperturbed gap: Ex-Ey+lx-ly=
SUM:	24.8794	-56.977			Data Filter: Include in max/min test if relative MCD signal >							0.9	rel abs >	0.03
MAX:	0.9892	1.027			Bx/Dx from min value gives max possible Dx, rescale by (³ 1)							1						2574.9
MIN:	0.0003	-3.9428				Bx/Dx= min value			-55.2204	rescalled	-55.2204	in T^-1 =	-0.0361141			Ave E=	3405.35	830.449
						By/Dy= max value			1.39518			in T^-1 =	0.00091245
Pyromethylpheophorbide dioxane						fraction Qx abs =Dx/(Dx+Dy)=			0.0650936		ratio -Bx/By=		2.75574
B/D scaling to units of Tesla^-1			0.000654
Experimental Data:				DA/A				Polarization			Partitioned ABS and MCD						Ave abs energy
n	A/n	DA/n		Raw	Filter	Filtered		fr. X	LD		Ax/n	Ay/n	DAx/n	DAy/n	Rel error		Ax	Ay
-542	0.0472	0.1787		3.78602	0	0		0	1		0	0.0472	0	0.0658527	-0.0286211		0	-25.5824
-512	0.0692	0.2141		3.09393	0	0		0	1		0	0.0692	0	0.0965467	-0.0298147		0	-35.4304
-482	0.1011	0.2628		2.59941	0	0		0	1		0	0.1011	0	0.141053	-0.0308783		0	-48.7302
-452	0.1361	0.3242		2.38207	0	0		0	1		0	0.1361	0	0.189885	-0.034066		0	-61.5172
-422	0.1733	0.3913		2.25793	0	0		0	1		0	0.1733	0	0.241785	-0.0379209		0	-73.1326
-392	0.22	0.4602		2.09182	0	0		0	1		0	0.22	0	0.30694	-0.0388707		0	-86.24
-362	0.2805	0.5339		1.90339	0	0		0	1		0	0.2805	0	0.391349	-0.0361547		0	-101.541
-332	0.3577	0.6128		1.71317	0	0		0	1		0	0.3577	0	0.499057	-0.0288482		0	-118.756
-302	0.4556	0.6901		1.51471	0	0		0	1		0	0.4556	0	0.635646	-0.013811		0	-137.591
-272	0.5668	0.7545		1.33116	0	0		0.0011309	0.997738		0.000640994	0.566159	-0.0353959	0.789896	2.81582e-17		-0.17435	-153.995
-242	0.6717	0.8101		1.20604	0	0		0.00334077	0.993318		0.00224399	0.669456	-0.123914	0.934014	2.81582e-17		-0.543047	-162.008
-212	0.7579	0.8803		1.1615	0	0		0.00412758	0.991745		0.00312829	0.754772	-0.172745	1.05305	2.81582e-17		-0.663197	-160.012
-182	0.8278	0.9413		1.13711	1	1.13711		0.00455835	0.990883		0.0037734	0.824027	-0.208369	1.14967	2.81582e-17		-0.686759	-149.973
-152	0.888	0.9699		1.09223	1	1.09223		0.00535108	0.989298		0.00475175	0.883248	-0.262394	1.23229	0		-0.722267	-134.254
-122	0.9356	0.9887		1.05676	1	1.05676		0.00597766	0.988045		0.0055927	0.930007	-0.308831	1.29753	-2.81582e-17		-0.68231	-113.461
-92	0.9664	1.0067		1.0417	1	1.0417		0.00624356	0.987513		0.00603378	0.960366	-0.333188	1.33989	-5.63165e-17		-0.555107	-88.3537
-62	0.9844	1.0206		1.03677	1	1.03677		0.00633059	0.987339		0.00623184	0.978168	-0.344124	1.36472	5.63165e-17		-0.386374	-60.6464
-32	0.9892	1.027		1.03821	1	1.03821		0.00630518	0.98739		0.00623708	0.982963	-0.344414	1.37141	5.63165e-17		-0.199587	-31.4548
-2	0.9741	1.0252		1.05246	1	1.05246		0.00605355	0.987893		0.00589676	0.968203	-0.325622	1.35082	0		-0.0117935	-1.93641
28	0.9342	1.0167		1.08831	1	1.08831		0.00542029	0.989159		0.00506364	0.929136	-0.279616	1.29632	0		0.141782	26.0158
58	0.8709	1.0005		1.14881	1	1.14881		0.00435167	0.991297		0.00378987	0.86711	-0.209278	1.20978	0		0.219812	50.2924
88	0.7834	0.9762		1.24611	1	1.24611		0.00263315	0.994734		0.00206281	0.781337	-0.113909	1.09011	2.81582e-17		0.181527	68.7577
118	0.6769	0.9444		1.39518	1	1.39518		0	1		0	0.6769	0	0.9444	-2.81582e-17		0	79.8742
148	0.5691	0.9048		1.58988	0	0		0	1		0	0.5691	0	0.793999	-0.0281021		0	84.2268
178	0.4706	0.8612		1.83	0	0		0	1		0	0.4706	0	0.656574	-0.0518988		0	83.7668
208	0.3837	0.8181		2.13213	0	0		0	1		0	0.3837	0	0.535332	-0.0717175		0	79.8096
238	0.3137	0.7763		2.47466	0	0		0	1		0	0.3137	0	0.437669	-0.0858859		0	74.6606
268	0.2599	0.7257		2.79223	0	0		0	1		0	0.2599	0	0.362608	-0.0920898		0	69.6532
298	0.2178	0.6647		3.05188	0	0		0	1		0	0.2178	0	0.303871	-0.0915159		0	64.9044
328	0.185	0.6087		3.29027	0	0		0	1		0	0.185	0	0.258109	-0.0889193		0	60.68
358	0.1556	0.5583		3.58805	0	0		0	1		0	0.1556	0	0.217091	-0.0865399		0	55.7048
388	0.1275	0.5077		3.98196	0	0		0	1		0	0.1275	0	0.177886	-0.0836497		0	49.47
418	0.1084	0.4578		4.22325	0	0		0	1		0	0.1084	0	0.151238	-0.0777524		0	45.3112
448	0.0972	0.4122		4.24074	0	0		0	1		0	0.0972	0	0.135612	-0.0701502		0	43.5456
478	0.0878	0.3682		4.19362	0	0		0	1		0	0.0878	0	0.122497	-0.0623168		0	41.9684
508	0.0785	0.3237		4.12357	0	0		0	1		0	0.0785	0	0.109522	-0.0543213		0	39.878
538	0.07	0.2791		3.98714	0	0		0	1		0	0.07	0	0.0976629	-0.0460173		0	37.66
568	0.063	0.2401		3.81111	0	0		0	1		0	0.063	0	0.0878966	-0.0386029		0	35.784
598	0.058	0.2125		3.66379	0	0		0	1		0	0.058	0	0.0809207	-0.0333721		0	34.684
628	0.055	0.1955		3.55455	0	0		0	1		0	0.055	0	0.0767351	-0.030122		0	34.54
658	0.0531	0.1845		3.47458	0	0		0	1		0	0.0531	0	0.0740843	-0.0280044		0	34.9398
688	0.0514	0.1761		3.42607	0	0		0	1		0	0.0514	0	0.0717125	-0.0264755		0	35.3632
718	0.0498	0.1695		3.40361	0	0		0	1		0	0.0498	0	0.0694802	-0.0253677		0	35.7564
748	0.0485	0.165		3.40206	0	0		0	1		0	0.0485	0	0.0676664	-0.0246864		0	36.278
778	0.0477	0.1616		3.38784	0	0		0	1		0	0.0477	0	0.0665503	-0.0241072		0	37.1106
808	0.0473	0.1568		3.31501	0	0		0	1		0	0.0473	0	0.0659922	-0.0230313		0	38.2184
838	0.047	0.145		3.08511	0	0		0	1		0	0.047	0	0.0655736	-0.0201447		0	39.386
868	0.0468	0.1204		2.57265	0	0		0	1		0	0.0468	0	0.0652946	-0.0139762		0	40.6224
898	0.0466	0.0841		1.80472	0	0		0	1		0	0.0466	0	0.0650156	-0.00484032		0	41.8468
928	0.0469	0.0398		0.848614	0	0		0.00965405	0.980692		0.000452775	0.0464472	-0.0250024	0.0648024	0		0.420175	43.103
958	0.0481	-0.006		-0.12474	0	0		0.0268464	0.946307		0.00129131	0.0468087	-0.0713067	0.0653067	-1.31992e-18		1.23708	44.8427
988	0.051	-0.0404		-0.792157	0	0		0.038635	0.92273		0.00197038	0.0490296	-0.108805	0.0684053	-1.75989e-18		1.94674	48.4413
1018	0.0547	-0.0681		-1.24497	0	0		0.046633	0.906734		0.00255083	0.0521492	-0.140858	0.0727577	0		2.59674	53.0879
1048	0.0587	-0.099		-1.68654	0	0		0.0544325	0.891135		0.00319519	0.0555048	-0.176439	0.0774394	3.51978e-18		3.34856	58.169
1078	0.0635	-0.1236		-1.94646	0	0		0.0590233	0.881953		0.00374798	0.059752	-0.206965	0.0833651	3.51978e-18		4.04033	64.4127
1108	0.0706	-0.1377		-1.95042	0	0		0.0590934	0.881813		0.004172	0.066428	-0.230379	0.0926793	7.03956e-18		4.62257	73.6022
1138	0.0779	-0.1488		-1.91014	0	0		0.0583819	0.883236		0.00454795	0.073352	-0.25114	0.10234	0		5.17557	83.4746
1168	0.0842	-0.1578		-1.87411	0	0		0.0577455	0.884509		0.00486217	0.0793378	-0.268491	0.110691	0		5.67901	92.6666
1198	0.0908	-0.1624		-1.78855	0	0		0.0562342	0.887532		0.00510606	0.0856939	-0.281959	0.119559	-1.40791e-17		6.11706	102.661
1228	0.0969	-0.1632		-1.68421	0	0		0.0543913	0.891217		0.00527052	0.0916295	-0.29104	0.12784	7.03956e-18		6.47219	112.521
1258	0.1015	-0.1611		-1.58719	0	0		0.0526777	0.894645		0.00534678	0.0961532	-0.295251	0.134151	7.03956e-18		6.72625	120.961
1288	0.1051	-0.1541		-1.46622	0	0		0.050541	0.898918		0.00531186	0.0997881	-0.293323	0.139223	-7.03956e-18		6.84167	128.527
1318	0.1082	-0.1417		-1.30961	0	0		0.0477748	0.90445		0.00516923	0.103031	-0.285447	0.143747	7.03956e-18		6.81304	135.795
1348	0.11	-0.1273		-1.15727	0	0		0.045084	0.909832		0.00495924	0.105041	-0.273851	0.146551	7.03956e-18		6.68506	141.595
1378	0.109	-0.1094		-1.00367	0	0		0.0423709	0.915258		0.00461843	0.104382	-0.255031	0.145631	1.40791e-17		6.3642	143.838
1408	0.104	-0.0869		-0.835577	0	0		0.0394019	0.921196		0.0040978	0.0999022	-0.226282	0.139382	0		5.7697	140.662
1438	0.0985	-0.0632		-0.641624	0	0		0.0359761	0.928048		0.00354365	0.0949564	-0.195682	0.132482	0		5.09576	136.547
1468	0.0941	-0.0406		-0.431456	0	0		0.0322639	0.935472		0.00303603	0.091064	-0.167651	0.127051	-7.03956e-18		4.4569	133.682
1498	0.0891	-0.0199		-0.223345	0	0		0.028588	0.942824		0.00254719	0.0865528	-0.140657	0.120757	-3.51978e-18		3.8157	129.656
1528	0.0838	-0.004		-0.0477327	0	0		0.0254862	0.949028		0.00213574	0.0816643	-0.117937	0.113937	-8.79945e-19		3.26342	124.783
1558	0.0777	0.0051		0.0656371	0	0		0.0234838	0.953032		0.00182469	0.0758753	-0.10076	0.10586	5.27967e-18		2.84286	118.214
1588	0.0706	0.0094		0.133144	0	0		0.0222914	0.955417		0.00157377	0.0690262	-0.0869043	0.0963043	4.8397e-18		2.49915	109.614
1618	0.0631	0.0122		0.193344	0	0		0.0212281	0.957544		0.00133949	0.0617605	-0.0739673	0.0861673	4.39972e-19		2.1673	99.9285
1648	0.0558	0.0141		0.252688	0	0		0.0201799	0.95964		0.00112604	0.054674	-0.0621802	0.0762802	4.39972e-19		1.85571	90.1027
1678	0.0487	0.0149		0.305955	0	0		0.019239	0.961522		0.000936941	0.0477631	-0.0517383	0.0666383	2.63983e-18		1.57219	80.1464
1708	0.0422	0.0144		0.341232	0	0		0.0186159	0.962768		0.000785592	0.0414144	-0.0433807	0.0577807	8.79945e-19		1.34179	70.7358
1738	0.0371	0.0135		0.363881	0	0		0.0182159	0.963568		0.000675809	0.0364242	-0.0373184	0.0508184	1.31992e-18		1.17456	63.3052
1768	0.0328	0.0124		0.378049	0	0		0.0179656	0.964069		0.000589273	0.0322107	-0.0325399	0.0449399	-1.31992e-18		1.04183	56.9486
1798	0.0289	0.0113		0.391003	0	0		0.0177368	0.964526		0.000512594	0.0283874	-0.0283057	0.0396057	-4.39972e-19		0.921644	51.0406
1828	0.0252	0.01		0.396825	0	0		0.017634	0.964732		0.000444377	0.0247556	-0.0245386	0.0345386	-4.39972e-19		0.81232	45.2533
1858	0.0218	0.0087		0.399083	0	0		0.0175941	0.964812		0.000383552	0.0214164	-0.0211799	0.0298799	0		0.712639	39.7918
1888	0.0184	0.0075		0.407609	0	0		0.0174435	0.965113		0.000320961	0.018079	-0.0177236	0.0252236	0		0.605974	34.1332
1918	0.0152	0.0063		0.414474	0	0		0.0173223	0.965355		0.000263299	0.0149367	-0.0145394	0.0208394	-4.39972e-19		0.505007	28.6486
1948	0.0121	0.005		0.413223	0	0		0.0173444	0.965311		0.000209867	0.0118901	-0.0115889	0.0165889	-2.19986e-19		0.40882	23.162
1978	0.0093	0.0037		0.397849	0	0		0.0176159	0.964768		0.000163828	0.00913617	-0.00904664	0.0127466	0		0.324052	18.0713
2008	0.007	0.0024		0.342857	0	0		0.0185872	0.962826		0.000130111	0.00686989	-0.00718476	0.00958476	-1.09993e-19		0.261262	13.7947
2038	0.005	0.0015		0.3	0	0		0.0193442	0.961312		9.67211e-05	0.00490328	-0.00534098	0.00684098	3.29979e-19		0.197118	9.99288
2068	0.0033	0.0012		0.363636	0	0		0.0182202	0.96356		6.01267e-05	0.00323987	-0.00332022	0.00452022	-2.74983e-19		0.124342	6.70006
2098	0.0017	0.0015		0.882353	0	0		0.00905813	0.981884		1.53988e-05	0.0016846	-0.000850328	0.00235033	0		0.0323067	3.53429
2128	0.0006	0.0022		3.66667	0	0		0	1		0	0.0006	0	0.00083711	-0.000345665		0	1.2768
2158	0.0003	0.0038		12.6667	0	0		0	1		0	0.0003	0	0.000418555	-0.000857625		0	0.6474
2188	0.0008	0.0062		7.75	0	0		0	1		0	0.0008	0	0.00111615	-0.0012894		0	1.7504
2218	0.0017	0.009		5.29412	0	0		0	1		0	0.0017	0	0.00237181	-0.00168109		0	3.7706
2248	0.0028	0.0117		4.17857	0	0		0	1		0	0.0028	0	0.00390651	-0.00197664		0	6.2944
2278	0.0038	0.0138		3.63158	0	0		0	1		0	0.0038	0	0.0053017	-0.0021554		0	8.6564
2308	0.0048	0.0156		3.25	0	0		0	1		0	0.0048	0	0.00669688	-0.00225807		0	11.0784
2338	0.0057	0.0171		3	0	0		0	1		0	0.0057	0	0.00795255	-0.00232004		0	13.3266
2368	0.0064	0.0186		2.90625	0	0		0	1		0	0.0064	0	0.00892918	-0.00245278		0	15.1552
2398	0.0072	0.0202		2.80556	0	0		0	1		0	0.0072	0	0.0100453	-0.0025755		0	17.2656
2428	0.0079	0.0217		2.74684	0	0		0	1		0	0.0079	0	0.011022	-0.00270824		0	19.1812
2458	0.0086	0.0229		2.66279	0	0		0	1		0	0.0086	0	0.0119986	-0.00276489		0	21.1388
2488	0.0093	0.0235		2.52688	0	0		0	1		0	0.0093	0	0.0129752	-0.00266937		0	23.1384
2518	0.0101	0.0231		2.28713	0	0		0	1		0	0.0101	0	0.0140914	-0.00228483		0	25.4318
2548	0.0108	0.0218		2.01852	0	0		0	1		0	0.0108	0	0.015068	-0.00170742		0	27.5184
2578	0.0116	0.0199		1.71552	0	0		0	1		0	0.0116	0	0.0161841	-0.000942444		0	29.9048
2608	0.0124	0.0177		1.42742	0	0		0	1		0	0.0124	0	0.0173003	-0.00010138		0	32.3392
2638	0.0134	0.0147		1.09701	0	0		0.00526655	0.989467		7.05718e-05	0.0133294	-0.003897	0.018597	4.39972e-19		0.186168	35.163
2668	0.0143	0.0104		0.727273	0	0		0.0117973	0.976405		0.000168701	0.0141313	-0.00931576	0.0197158	0		0.450096	37.7023
2698	0.0151	0.0052		0.344371	0	0		0.0185605	0.962879		0.000280263	0.0148197	-0.0154763	0.0206763	-4.39972e-19		0.756151	39.9836
2728	0.0159	-0.0018		-0.113208	0	0		0.0266427	0.946715		0.000423619	0.0154764	-0.0233924	0.0215924	1.09993e-19		1.15563	42.2196
2758	0.0164	-0.011		-0.670732	0	0		0.0364902	0.92702		0.00059844	0.0158016	-0.0330461	0.0220461	8.79945e-19		1.6505	43.5807
2788	0.0163	-0.0224		-1.37423	0	0		0.0489162	0.902168		0.000797334	0.0155027	-0.0440291	0.0216291	1.75989e-18		2.22297	43.2214
2818	0.0156	-0.0376		-2.41026	0	0		0.0672154	0.865569		0.00104856	0.0145514	-0.0579019	0.0203019	1.75989e-18		2.95484	41.006
2848	0.0146	-0.062		-4.24658	0	0		0.0996503	0.800699		0.00145489	0.0131451	-0.0803398	0.0183398	0		4.14354	37.4373
2878	0.0136	-0.0956		-7.02941	0	0		0.148804	0.702393		0.00202373	0.0115763	-0.111751	0.016151	0		5.82429	33.3165
2908	0.0127	-0.1362		-10.7244	0	0		0.214068	0.571864		0.00271867	0.00998133	-0.150126	0.0139258	0		7.90588	29.0257
2938	0.0118	-0.1914		-16.2203	0	0		0.311143	0.377715		0.00367148	0.00812852	-0.202741	0.0113408	-7.03956e-18		10.7868	23.8816
2968	0.0108	-0.2653		-24.5648	0	0		0.458531	0.0829379		0.00495214	0.00584786	-0.273459	0.00815885	0		14.6979	17.3565
2998	0.0099	-0.3644		-36.8081	0	0		0.674784	-0.349567		0.00668036	0.00321964	-0.368892	0.00449199	0		20.0277	9.65249
3028	0.0094	-0.5038		-53.5957	0	0		0.971304	-0.942608		0.00913026	0.000269743	-0.504176	0.000376341	0		27.6464	0.816782
3058	0.0098	-0.6621		-67.5612	0	0		1	-1		0.0098	0	-0.54116	0	0.0306737		29.9684	0
3088	0.0111	-0.8342		-75.1532	0	0		1	-1		0.0111	0	-0.612946	0	0.0561159		34.2768	0
3118	0.013	-1.0259		-78.9154	0	0		1	-1		0.013	0	-0.717865	0	0.0781259		40.534	0
3148	0.0147	-1.2337		-83.9252	0	0		1	-1		0.0147	0	-0.81174	0	0.10702		46.2756	0
3178	0.0163	-1.463		-89.7546	0	0		1	-1		0.0163	0	-0.900092	0	0.142769		51.8014	0
3208	0.0176	-1.7238		-97.9432	0	0		1	-1		0.0176	0	-0.971879	0	0.190707		56.4608	0
3238	0.0192	-2.0446		-106.49	0	0		1	-1		0.0192	0	-1.06023	0	0.249662		62.1696	0
3268	0.022	-2.3433		-106.514	0	0		1	-1		0.022	0	-1.21485	0	0.286206		71.896	0
3298	0.0272	-2.6309		-96.7243	0	0		1	-1		0.0272	0	-1.50199	0	0.286321		89.7056	0
3328	0.0347	-2.9113		-83.8991	0	0		1	-1		0.0347	0	-1.91615	0	0.252397		115.482	0
3358	0.0436	-3.169		-72.6835	0	0		1	-1		0.0436	0	-2.40761	0	0.193109		146.409	0
3388	0.0546	-3.4549		-63.2766	0	0		1	-1		0.0546	0	-3.01503	0	0.111562		184.985	0
3418	0.0667	-3.6832		-55.2204	1	-55.2204		1	-1		0.0667	0	-3.6832	0	0		227.981	0
3448	0.0755	-3.831		-50.7417	1	-50.7417		0.920893	-0.841787		0.0695274	0.00597255	-3.83933	0.00833281	-1.12633e-16		239.731	20.5934
3478	0.0807	-3.9228		-48.6097	1	-48.6097		0.883235	-0.76647		0.0712771	0.00942295	-3.93595	0.0131467	0		247.902	32.773
3508	0.0847	-3.9428		-46.5502	1	-46.5502		0.846858	-0.693716		0.0717289	0.0129711	-3.9609	0.0180971	0		251.625	45.5027
3538	0.0882	-3.898		-44.195	1	-44.195		0.805259	-0.610518		0.0710238	0.0171762	-3.92196	0.0239639	0		251.282	60.7693
3568	0.0906	-3.7844		-41.7704	1	-41.7704		0.762433	-0.524867		0.0690765	0.0215235	-3.81443	0.0300293	0		246.465	76.796
3598	0.0904	-3.5912		-39.7257	1	-39.7257		0.726317	-0.452634		0.065659	0.024741	-3.62572	0.0345182	0		236.241	89.0179
3628	0.0877	-3.3496		-38.1938	0	0		0.69926	-0.398521		0.0613251	0.0263749	-3.3864	0.0367978	1.12633e-16		222.488	95.688
3658	0.0838	-3.0957		-36.9415	0	0		0.677141	-0.354281		0.0567444	0.0270556	-3.13345	0.0377475	-1.12633e-16		207.571	98.9694
3688	0.0795	-2.8047		-35.2792	0	0		0.64778	-0.29556		0.0514985	0.0280015	-2.84377	0.0390672	-1.12633e-16		189.926	103.27
3718	0.075	-2.4917		-33.2227	0	0		0.611455	-0.222909		0.0458591	0.0291409	-2.53236	0.0406569	-1.12633e-16		170.504	108.346
3748	0.0702	-2.2142		-31.5413	0	0		0.581757	-0.163514		0.0408393	0.0293607	-2.25516	0.0409635	0		153.066	110.044
3778	0.0653	-1.9229		-29.4472	0	0		0.544768	-0.0895359		0.0355733	0.0297267	-1.96437	0.0414741	-1.12633e-16		134.396	112.307
3808	0.0602	-1.6055		-26.6694	0	0		0.495705	0.00859014		0.0298414	0.0303586	-1.64786	0.0423558	0		113.636	115.605
3838	0.0556	-1.3457		-24.2032	0	0		0.452145	0.095711		0.0251392	0.0304608	-1.3882	0.0424984	0		96.4844	116.908
3868	0.0515	-1.1585		-22.4951	0	0		0.421975	0.156051		0.0217317	0.0297683	-1.20003	0.0415323	0		84.0582	115.144
3898	0.0479	-1.0037		-20.9541	0	0		0.394755	0.210491		0.0189087	0.0289913	-1.04415	0.0404481	0		73.7063	113.008
3928	0.0448	-0.8633		-19.2701	0	0		0.36501	0.269979		0.0163525	0.0284475	-0.90299	0.0396895	0		64.2325	111.742
3958	0.0422	-0.7546		-17.8815	0	0		0.340484	0.319032		0.0143684	0.0278316	-0.79343	0.0388302	-2.81582e-17		56.8702	110.157
3988	0.0396	-0.6743		-17.0278	0	0		0.325404	0.349191		0.012886	0.026714	-0.711571	0.0372709	0		51.3894	106.535
4018	0.037	-0.6048		-16.3459	0	0		0.313361	0.373277		0.0115944	0.0254056	-0.640246	0.0354455	0		46.5862	102.08
4048	0.0344	-0.5413		-15.7355	0	0		0.302578	0.394843		0.0104087	0.0239913	-0.574772	0.0334723	2.81582e-17		42.1344	97.1168
4078	0.0321	-0.4843		-15.0872	0	0		0.291129	0.417743		0.00934523	0.0227548	-0.516047	0.0317471	2.81582e-17		38.1098	92.794
4108	0.0305	-0.435		-14.2623	0	0		0.276558	0.446884		0.00843501	0.022065	-0.465785	0.0307847	0		34.651	90.643
4138	0.0306	-0.3954		-12.9216	0	0		0.252877	0.494247		0.00773802	0.022862	-0.427297	0.0318967	0		32.0199	94.6029
4168	0.0323	-0.3645		-11.2848	0	0		0.223967	0.552066		0.00723413	0.0250659	-0.399471	0.0349715	0		30.1519	104.475
4198	0.0351	-0.3375		-9.61538	0	0		0.19448	0.611041		0.00682623	0.0282738	-0.376947	0.0394471	0		28.6565	118.693
4228	0.0387	-0.3139		-8.11111	0	0		0.16791	0.664181		0.0064981	0.0322019	-0.358828	0.0449276	0		27.474	136.15
4258	0.0435	-0.2915		-6.70115	0	0		0.143005	0.713989		0.00622074	0.0372793	-0.343511	0.0520114	0		26.4879	158.735
4288	0.05	-0.2652		-5.304	0	0		0.118328	0.763345		0.00591638	0.0440836	-0.326705	0.0615048	0		25.3694	189.031
4318	0.0573	-0.2411		-4.20768	0	0		0.0989633	0.802073		0.0056706	0.0516294	-0.313133	0.0720325	0		24.4856	222.936
4348	0.0643	-0.2225		-3.46034	0	0		0.0857631	0.828474		0.00551457	0.0587854	-0.304516	0.0820165	7.03956e-18		23.9773	255.599
4378	0.0708	-0.2052		-2.89831	0	0		0.0758358	0.848328		0.00536918	0.0654308	-0.296488	0.091288	-7.03956e-18		23.5063	286.456
4408	0.0767	-0.1898		-2.47458	0	0		0.0683515	0.863297		0.00524256	0.0714574	-0.289496	0.0996963	2.11187e-17		23.1092	314.984
4438	0.0824	-0.1766		-2.1432	0	0		0.0624985	0.875003		0.00514988	0.0772501	-0.284378	0.107778	0		22.8551	342.836
4468	0.088	-0.1651		-1.87614	0	0		0.0577813	0.884437		0.00508475	0.0829152	-0.280782	0.115682	-7.03956e-18		22.7187	370.465
4498	0.0935	-0.1567		-1.67594	0	0		0.0542451	0.89151		0.00507192	0.0884281	-0.280073	0.123373	0		22.8135	397.75
4528	0.0985	-0.1494		-1.51675	0	0		0.0514335	0.897133		0.0050662	0.0934338	-0.279757	0.130357	7.03956e-18		22.9397	423.068
4558	0.1025	-0.1428		-1.39317	0	0		0.0492507	0.901499		0.00504819	0.0974518	-0.278763	0.135963	0		23.0097	444.185
4588	0.1054	-0.1395		-1.32353	0	0		0.0480206	0.903959		0.00506137	0.100339	-0.279491	0.139991	0		23.2216	460.354
4618	0.1075	-0.1403		-1.30512	0	0		0.0476954	0.904609		0.00512725	0.102373	-0.283129	0.142829	0		23.6776	472.757
4648	0.1095	-0.1436		-1.31142	0	0		0.0478066	0.904387		0.00523483	0.104265	-0.289069	0.145469	7.03956e-18		24.3315	484.625
4678	0.1113	-0.1472		-1.32255	0	0		0.0480033	0.903993		0.00534277	0.105957	-0.29503	0.14783	0		24.9935	495.668
4708	0.1128	-0.1506		-1.33511	0	0		0.0482251	0.90355		0.00543979	0.10736	-0.300387	0.149787	7.03956e-18		25.6105	505.452
4738	0.1135	-0.1521		-1.34009	0	0		0.0483131	0.903374		0.00548353	0.108016	-0.302803	0.150703	1.40791e-17		25.981	511.782
4768	0.1134	-0.1479		-1.30423	0	0		0.0476798	0.90464		0.00540688	0.107993	-0.29857	0.15067	7.03956e-18		25.78	514.911
4798	0.1123	-0.1381		-1.22974	0	0		0.046364	0.907272		0.00520668	0.107093	-0.287515	0.149415	7.03956e-18		24.9816	513.834
4828	0.1094	-0.1258		-1.14991	0	0		0.0449539	0.910092		0.00491796	0.104482	-0.271572	0.145772	0		23.7439	504.439
4858	0.1039	-0.1115		-1.07315	0	0		0.0435981	0.912804		0.00452984	0.0993702	-0.25014	0.13864	-3.51978e-18		22.006	482.74
4888	0.097	-0.0975		-1.00515	0	0		0.0423971	0.915206		0.00411252	0.0928875	-0.227095	0.129595	1.40791e-17		20.102	454.034
4918	0.0901	-0.085		-0.943396	0	0		0.0413063	0.917387		0.0037217	0.0863783	-0.205514	0.120514	0		18.3033	424.808
4948	0.0841	-0.0731		-0.869203	0	0		0.0399958	0.920008		0.00336365	0.0807364	-0.185742	0.112642	3.51978e-18		16.6433	399.483
4978	0.0791	-0.0621		-0.785082	0	0		0.03851	0.92298		0.00304614	0.0760539	-0.168209	0.106109	1.05593e-17		15.1637	378.596
5008	0.0746	-0.0507		-0.679625	0	0		0.0366473	0.926705		0.00273389	0.0718661	-0.150966	0.100266	1.75989e-18		13.6913	359.905
5038	0.0702	-0.0401		-0.571225	0	0		0.0347327	0.930535		0.00243823	0.0677618	-0.13464	0.0945401	3.51978e-18		12.2838	341.384
5068	0.0657	-0.0293		-0.445967	0	0		0.0325202	0.93496		0.00213658	0.0635634	-0.117983	0.0886827	-5.27967e-18		10.8282	322.139
5098	0.0604	-0.0201		-0.332781	0	0		0.030521	0.938958		0.00184347	0.0585565	-0.101797	0.0816971	-1.75989e-18		9.39801	298.521
5128	0.0548	-0.0154		-0.281022	0	0		0.0296068	0.940786		0.00162245	0.0531775	-0.0895925	0.0741925	4.39972e-18		8.31994	272.694
5158	0.0494	-0.013		-0.263158	0	0		0.0292913	0.941417		0.00144699	0.047953	-0.0799033	0.0669033	-3.07981e-18		7.46357	247.342
5188	0.0439	-0.0112		-0.255125	0	0		0.0291494	0.941701		0.00127966	0.0426203	-0.0706632	0.0594632	-4.39972e-19		6.63887	221.114
5218	0.0385	-0.0094		-0.244156	0	0		0.0289556	0.942089		0.00111479	0.0373852	-0.0615592	0.0521592	2.19986e-18		5.81698	195.076
5248	0.0335	-0.0077		-0.229851	0	0		0.028703	0.942594		0.000961549	0.0325385	-0.0530971	0.0453971	4.39972e-19		5.04621	170.762
5278	0.0292	-0.0064		-0.219178	0	0		0.0285145	0.942971		0.000832622	0.0283674	-0.0459777	0.0395777	1.09993e-18		4.39458	149.723
5308	0.0257	-0.0055		-0.214008	0	0		0.0284231	0.943154		0.000730474	0.0249695	-0.0403371	0.0348371	4.39972e-19		3.87736	132.538
5338	0.0223	-0.0051		-0.2287	0	0		0.0286826	0.942635		0.000639623	0.0216604	-0.0353202	0.0302202	0		3.41431	115.623
5368	0.0189	-0.0047		-0.248677	0	0		0.0290355	0.941929		0.000548771	0.0183512	-0.0303033	0.0256033	2.19986e-19		2.9458	98.5094
5398	0.0157	-0.0043		-0.273885	0	0		0.0294807	0.941039		0.000462848	0.0152372	-0.0255586	0.0212586	4.39972e-19		2.49845	82.2501
5428	0.0128	-0.004		-0.3125	0	0		0.0301628	0.939674		0.000386084	0.0124139	-0.0213197	0.0173197	0		2.09566	67.3827
5458	0.0107	-0.004		-0.373832	0	0		0.0312461	0.937508		0.000334333	0.0103657	-0.018462	0.014462	0		1.82479	56.5758
5488	0.0094	-0.0045		-0.478723	0	0		0.0330988	0.933802		0.000311129	0.00908887	-0.0171806	0.0126806	-6.59959e-19		1.70747	49.8797
5518	0.0082	-0.0053		-0.646341	0	0		0.0360594	0.927881		0.000295687	0.00790431	-0.016328	0.011028	1.09993e-18		1.6316	43.616

## Sheet: BChl-a pyridine
Spreadsheet to evaluate maximum-possible fraction of Qx absorption and Qx-Qy gap by analytical inversion of MCD and ABS data
Source: Reimers, Cai, Kobyashi, Rätsep, Freiberg and Krausz
Enter the observed data in the blue fields incolumns A,B,C as frequency, Absorption/frequency, and MCD Delta Absorption / frequency. Assumes equally spaced in frequency (else replace all sums by integrals)
NOTE: this analysis will only work well if the data has little noise, the band tails are included, there are no interfering transitions, there is only 1 species present (eg no aggregation) and the base line is accurate.
Enter the Magnetic field strength and other factors needed to express B/D in physical units in cell D17
Data filtering parameters entered in cells M12 and O12 eliminates noise due to weak signals; a small relative error in the data inversion usually results because of this
A valid soution is obtained for any rescaling ³1 of the initial Bx/Dx beyond the value that gives maximal Dx absorption, enter a rescaling in cell M13
Yellow boxes contain intermediate and final outupts
																approx Qx-Qy unperturbed gap: Ex-Ey+lx-ly=
SUM:	33.6015	-15.6889			Data Filter: Include in max/min test if relative MCD signal >							0.6	rel abs >	0.03
MAX:	0.981	0.987			Bx/Dx from min value gives max possible Dx, rescale by (³ 1)							1						3051.01
MIN:	0.0124	-1.0104				Bx/Dx= min value			-6.01608	rescalled	-6.01608	in T^-1 =	-0.00200937			Ave E=	3404.22	353.207
						By/Dy= max value			1.03299			in T^-1 =	0.000345019
BChl-a pyridine						fraction Qx abs =Dx/(Dx+Dy)=			0.21278		ratio -Bx/By=		1.57417
B/D scaling to units of Tesla^-1			0.000334
Experimental Data:				DA/A				Polarization			Partitioned ABS and MCD						Ave abs energy
n	A/n	DA/n		Raw	Filter	Filtered		fr. X	LD		Ax/n	Ay/n	DAx/n	DAy/n	Rel error		Ax	Ay
-651	0.013	-0.0139		-1.06923	0	0		0.298227	0.403547		0.00387695	0.00912305	-0.023324	0.00942403	-5.1506e-18		-2.52389	-5.93911
-621	0.0194	-0.0027		-0.139175	0	0		0.166287	0.667427		0.00322596	0.016174	-0.0194076	0.0167076	-8.58434e-19		-2.00332	-10.0441
-591	0.0283	0.0064		0.226148	0	0		0.114461	0.771078		0.00323924	0.0250608	-0.0194875	0.0258875	-4.29217e-18		-1.91439	-14.8109
-561	0.0416	0.0164		0.394231	0	0		0.0906162	0.818768		0.00376963	0.0378304	-0.0226784	0.0390784	0		-2.11476	-21.2228
-531	0.0605	0.0343		0.566942	0	0		0.0661149	0.86777		0.00399995	0.0565	-0.024064	0.058364	0		-2.12397	-30.0015
-501	0.086	0.0604		0.702326	0	0		0.0469091	0.906182		0.00403418	0.0819658	-0.02427	0.08467	6.86747e-18		-2.02112	-41.0649
-471	0.12	0.093		0.775	0	0		0.0365993	0.926801		0.00439191	0.115608	-0.0264221	0.119422	-1.37349e-17		-2.06859	-54.4514
-441	0.1652	0.1357		0.821429	0	0		0.0300128	0.939974		0.00495811	0.160242	-0.0298284	0.165528	0		-2.18653	-70.6667
-411	0.2216	0.1935		0.873195	0	0		0.0226691	0.954662		0.00502347	0.216577	-0.0302216	0.223722	0		-2.06465	-89.013
-381	0.2895	0.2688		0.928497	0	0		0.0148237	0.970353		0.00429147	0.285209	-0.0258178	0.294618	-5.49398e-17		-1.63505	-108.664
-351	0.3688	0.3607		0.978037	0	0		0.00779593	0.984408		0.00287514	0.365925	-0.0172971	0.377997	5.49398e-17		-1.00917	-128.44
-321	0.4569	0.4639		1.01532	0	0		0.00250676	0.994986		0.00114534	0.455755	-0.00689045	0.47079	5.49398e-17		-0.367654	-146.297
-291	0.5499	0.5682		1.03328	0	0		0	1		0	0.5499	0	0.568042	-0.000156634		0	-160.021
-261	0.6426	0.6638		1.03299	1	1.03299		0	1		0	0.6426	0	0.6638	0		0	-167.719
-231	0.7289	0.7453		1.0225	1	1.0225		0.00148833	0.997023		0.00108484	0.727815	-0.00652649	0.751826	0		-0.250598	-168.125
-201	0.8069	0.8116		1.00582	1	1.00582		0.00385387	0.992292		0.00310969	0.80379	-0.0187081	0.830308	0		-0.625047	-161.562
-171	0.874	0.8656		0.990389	1	0.990389		0.00604362	0.987913		0.00528213	0.868718	-0.0317777	0.897378	-1.0988e-16		-0.903244	-148.551
-141	0.9256	0.9125		0.985847	1	0.985847		0.00668796	0.986624		0.00619038	0.91941	-0.0372418	0.949742	-1.0988e-16		-0.872844	-129.637
-111	0.96	0.9542		0.993958	1	0.993958		0.00553727	0.988925		0.00531578	0.954684	-0.0319802	0.98618	0		-0.590052	-105.97
-81	0.9778	0.9832		1.00552	1	1.00552		0.00389673	0.992207		0.00381023	0.97399	-0.0229226	1.00612	-1.0988e-16		-0.308628	-78.8932
-51	0.981	0.987		1.00612	1	1.00612		0.00381252	0.992375		0.00374009	0.97726	-0.0225007	1.0095	1.0988e-16		-0.190744	-49.8403
-21	0.9713	0.968		0.996602	1	0.996602		0.00516216	0.989676		0.00501401	0.966286	-0.0301647	0.998165	1.0988e-16		-0.105294	-20.292
9	0.9506	0.94		0.988849	1	0.988849		0.00626207	0.987476		0.00595273	0.944647	-0.0358121	0.975812	0		0.0535746	8.50183
39	0.9198	0.9128		0.99239	1	0.99239		0.00575981	0.98848		0.00529787	0.914502	-0.0318724	0.944672	-1.0988e-16		0.206617	35.6656
69	0.8802	0.8794		0.999091	1	0.999091		0.00480912	0.990382		0.00423299	0.875967	-0.025466	0.904866	-1.0988e-16		0.292076	60.4417
99	0.8335	0.8336		1.00012	1	1.00012		0.00466317	0.990674		0.00388675	0.829613	-0.023383	0.856983	-1.0988e-16		0.384788	82.1317
129	0.7817	0.7796		0.997314	1	0.997314		0.00506129	0.989877		0.00395641	0.777744	-0.0238021	0.803402	0		0.510377	100.329
159	0.7278	0.7276		0.999725	1	0.999725		0.00471917	0.990562		0.00343461	0.724365	-0.0206629	0.748263	0		0.546103	115.174
189	0.6743	0.6815		1.01068	1	1.01068		0.00316541	0.993669		0.00213444	0.672166	-0.012841	0.694341	-1.0988e-16		0.403409	127.039
219	0.6208	0.6348		1.02255	1	1.02255		0.00148096	0.997038		0.000919383	0.619881	-0.00553108	0.640331	-1.0988e-16		0.201345	135.754
249	0.5667	0.5867		1.03529	0	0		0	1		0	0.5667	0	0.585396	-0.00129059		0	141.108
279	0.5138	0.5429		1.05664	0	0		0	1		0	0.5138	0	0.530751	-0.0120242		0	143.35
309	0.4648	0.4984		1.07229	0	0		0	1		0	0.4648	0	0.480134	-0.0180778		0	143.623
339	0.4214	0.4529		1.07475	0	0		0	1		0	0.4214	0	0.435302	-0.0174165		0	142.855
369	0.3829	0.412		1.076	0	0		0	1		0	0.3829	0	0.395532	-0.0162983		0	141.29
399	0.3486	0.3762		1.07917	0	0		0	1		0	0.3486	0	0.360101	-0.0159336		0	139.091
429	0.3179	0.3459		1.08808	0	0		0	1		0	0.3179	0	0.328388	-0.0173319		0	136.379
459	0.2902	0.3199		1.10234	0	0		0	1		0	0.2902	0	0.299774	-0.0199189		0	133.202
489	0.2647	0.2931		1.10729	0	0		0	1		0	0.2647	0	0.273433	-0.0194649		0	129.438
519	0.242	0.2695		1.11364	0	0		0	1		0	0.242	0	0.249984	-0.0193153		0	125.598
549	0.2222	0.2513		1.13096	0	0		0	1		0	0.2222	0	0.229531	-0.0215453		0	121.988
579	0.2049	0.2324		1.13421	0	0		0	1		0	0.2049	0	0.21166	-0.0205267		0	118.637
609	0.1894	0.2116		1.11721	0	0		0	1		0	0.1894	0	0.195648	-0.0157873		0	115.345
639	0.1762	0.1938		1.09989	0	0		0	1		0	0.1762	0	0.182013	-0.0116657		0	112.592
669	0.1655	0.1795		1.08459	0	0		0	1		0	0.1655	0	0.17096	-0.00845209		0	110.72
699	0.1565	0.1665		1.0639	0	0		0	1		0	0.1565	0	0.161663	-0.00478713		0	109.394
729	0.1491	0.1518		1.01811	0	0		0.00211124	0.995778		0.000314787	0.148785	-0.00189378	0.153694	0		0.229479	108.464
759	0.1434	0.1317		0.91841	0	0		0.0162547	0.967491		0.00233093	0.141069	-0.0140231	0.145723	0		1.76918	107.071
789	0.1388	0.1071		0.771614	0	0		0.0370796	0.925841		0.00514665	0.133653	-0.0309627	0.138063	-2.74699e-17		4.06071	105.452
819	0.1347	0.0819		0.608018	0	0		0.0602878	0.879424		0.00812077	0.126579	-0.0488552	0.130755	2.74699e-17		6.65091	103.668
849	0.1314	0.0623		0.474125	0	0		0.0792822	0.841436		0.0104177	0.120982	-0.0626736	0.124974	6.86747e-18		8.84461	102.714
879	0.1292	0.0503		0.389319	0	0		0.091313	0.817374		0.0117976	0.117402	-0.0709756	0.121276	-1.37349e-17		10.3701	103.197
909	0.1281	0.041		0.320062	0	0		0.101138	0.797724		0.0129558	0.115144	-0.077943	0.118943	6.86747e-18		11.7768	104.666
939	0.1274	0.0323		0.253532	0	0		0.110576	0.778848		0.0140874	0.113313	-0.0847509	0.117051	6.86747e-18		13.2281	106.401
969	0.1271	0.0243		0.191188	0	0		0.11942	0.761159		0.0151783	0.111922	-0.0913141	0.115614	3.43374e-18		14.7078	108.452
999	0.1268	0.0172		0.135647	0	0		0.1273	0.745401		0.0161416	0.110658	-0.0971091	0.114309	2.06024e-17		16.1254	110.548
1029	0.1266	0.0116		0.0916272	0	0		0.133544	0.732911		0.0169067	0.109693	-0.101712	0.113312	-1.37349e-17		17.397	112.874
1059	0.1263	0.0066		0.0522565	0	0		0.13913	0.721741		0.0175721	0.108728	-0.105715	0.112315	-4.63554e-17		18.6088	115.143
1089	0.1261	0.0009		0.00713719	0	0		0.14553	0.708939		0.0183514	0.107749	-0.110403	0.111303	-1.93148e-18		19.9846	117.338
1119	0.1258	-0.0048		-0.0381558	0	0		0.151956	0.696089		0.019116	0.106684	-0.115004	0.110204	8.58434e-19		21.3908	119.379
1149	0.1254	-0.0075		-0.0598086	0	0		0.155027	0.689945		0.0194404	0.10596	-0.116955	0.109455	6.86747e-18		22.3371	121.748
1179	0.1246	-0.0069		-0.0553772	0	0		0.154399	0.691203		0.0192381	0.105362	-0.115738	0.108838	-3.09036e-17		22.6817	124.222
1209	0.1228	-0.005		-0.0407166	0	0		0.152319	0.695362		0.0187048	0.104095	-0.112529	0.107529	-4.29217e-18		22.6141	125.851
1239	0.121	-0.004		-0.0330579	0	0		0.151232	0.697535		0.0182991	0.102701	-0.110089	0.106089	-3.43374e-18		22.6726	127.246
1269	0.1188	-0.0045		-0.0378788	0	0		0.151916	0.696167		0.0180477	0.100752	-0.108576	0.104076	-4.29217e-18		22.9025	127.855
1299	0.116	-0.0046		-0.0396552	0	0		0.152168	0.695663		0.0176515	0.0983485	-0.106193	0.101593	6.86747e-18		22.9293	127.755
1329	0.1124	-0.0007		-0.00622776	0	0		0.147426	0.705147		0.0165707	0.0958293	-0.0996908	0.0989908	-1.98513e-17		22.0225	127.357
1359	0.108	0.0058		0.0537037	0	0		0.138924	0.722152		0.0150038	0.0929962	-0.0902642	0.0960642	0		20.3902	126.382
1389	0.1033	0.0104		0.100678	0	0		0.13226	0.735479		0.0136625	0.0896375	-0.0821947	0.0925947	6.86747e-18		18.9772	124.506
1419	0.0989	0.013		0.131446	0	0		0.127896	0.744209		0.0126489	0.0862511	-0.0760966	0.0890966	-1.54518e-17		17.9487	122.39
1449	0.0945	0.0148		0.156614	0	0		0.124325	0.75135		0.0117487	0.0827513	-0.0706813	0.0854813	-6.86747e-18		17.0239	119.907
1479	0.0903	0.0147		0.162791	0	0		0.123449	0.753102		0.0111474	0.0791526	-0.0670639	0.0817639	5.1506e-18		16.4871	117.067
1509	0.0858	0.0137		0.159674	0	0		0.123891	0.752218		0.0106299	0.0751701	-0.0639501	0.0776501	-2.40362e-17		16.0404	113.432
1539	0.0811	0.0126		0.155364	0	0		0.124502	0.750995		0.0100972	0.0710028	-0.0607453	0.0733453	6.86747e-18		15.5395	109.273
1569	0.076	0.0103		0.135526	0	0		0.127317	0.745367		0.00967607	0.0663239	-0.058212	0.068512	-3.43374e-18		15.1817	104.062
1599	0.0716	0.0074		0.103352	0	0		0.131881	0.736238		0.00944268	0.0621573	-0.056808	0.064208	-1.71687e-17		15.0988	99.3896
1629	0.0682	0.0061		0.0894428	0	0		0.133854	0.732292		0.00912886	0.0590711	-0.05492	0.06102	-6.00904e-18		14.8709	96.2269
1659	0.0642	0.007		0.109034	0	0		0.131075	0.73785		0.00841501	0.055785	-0.0506254	0.0576254	-8.58434e-19		13.9605	92.5473
1689	0.0602	0.0101		0.167774	0	0		0.122742	0.754516		0.00738906	0.0528109	-0.0444532	0.0545532	-1.71687e-18		12.4801	89.1977
1719	0.057	0.0138		0.242105	0	0		0.112197	0.775606		0.00639523	0.0506048	-0.0384743	0.0522743	-6.86747e-18		10.9934	86.9896
1749	0.054	0.0142		0.262963	0	0		0.109238	0.781524		0.00589886	0.0481011	-0.035488	0.049688	3.43374e-18		10.3171	84.1289
1779	0.0511	0.0087		0.170254	0	0		0.12239	0.75522		0.00625413	0.0448459	-0.0376254	0.0463254	6.86747e-18		11.1261	79.7808
1809	0.0489	-0.0006		-0.0122699	0	0		0.148283	0.703433		0.00725106	0.0416489	-0.043623	0.043023	-3.32643e-18		13.1172	75.3429
1839	0.0468	-0.008		-0.17094	0	0		0.170793	0.658414		0.0079931	0.0388069	-0.0480872	0.0400872	-6.86747e-18		14.6993	71.3659
1869	0.045	-0.0106		-0.235556	0	0		0.179959	0.640081		0.00809817	0.0369018	-0.0487193	0.0381193	-5.1506e-18		15.1355	68.9695
1899	0.0434	-0.0104		-0.239631	0	0		0.180538	0.638925		0.00783533	0.0355647	-0.047138	0.036738	-1.37349e-17		14.8793	67.5373
1929	0.0423	-0.0095		-0.224586	0	0		0.178403	0.643194		0.00754645	0.0347535	-0.0454001	0.0359001	5.1506e-18		14.5571	67.0396
1959	0.0412	-0.0079		-0.191748	0	0		0.173745	0.652511		0.00715828	0.0340417	-0.0430648	0.0351648	-3.43374e-18		14.0231	66.6877
1989	0.0403	-0.0044		-0.109181	0	0		0.162032	0.675937		0.00652987	0.0337701	-0.0392842	0.0348842	-7.72591e-18		12.9879	67.1688
2019	0.0395	0.0003		0.00759494	0	0		0.145465	0.709069		0.00574588	0.0337541	-0.0345677	0.0348677	1.66322e-18		11.6009	68.1496
2049	0.0386	0.0011		0.0284974	0	0		0.1425	0.715		0.0055005	0.0330995	-0.0330915	0.0341915	-3.21913e-18		11.2705	67.8209
2079	0.038	-0.0061		-0.160526	0	0		0.169315	0.661369		0.00643399	0.031566	-0.0387074	0.0326074	-7.72591e-18		13.3763	65.6257
2109	0.0375	-0.0171		-0.456	0	0		0.211232	0.577536		0.0079212	0.0295788	-0.0476546	0.0305546	3.43374e-18		16.7058	62.3817
2139	0.0372	-0.0231		-0.620968	0	0		0.234635	0.53073		0.00872842	0.0284716	-0.0525109	0.0294109	-1.03012e-17		18.6701	60.9007
2169	0.037	-0.0209		-0.564865	0	0		0.226676	0.546648		0.00838701	0.028613	-0.050457	0.029557	-3.43374e-18		18.1914	62.0616
2199	0.037	-0.0171		-0.462162	0	0		0.212106	0.575787		0.00784793	0.0291521	-0.0472138	0.0301138	0		17.2576	64.1054
2229	0.0369	-0.0182		-0.493225	0	0		0.216513	0.566974		0.00798933	0.0289107	-0.0480645	0.0298645	-6.86747e-18		17.8082	64.4419
2259	0.0369	-0.0242		-0.655827	0	0		0.23958	0.52084		0.0088405	0.0280595	-0.0531852	0.0289852	6.86747e-18		19.9707	63.3864
2289	0.0368	-0.0324		-0.880435	0	0		0.271444	0.457113		0.00998912	0.0268109	-0.0600954	0.0276954	-6.86747e-18		22.8651	61.3701
2319	0.0368	-0.0416		-1.13043	0	0		0.306909	0.386182		0.0112943	0.0255057	-0.0679472	0.0263472	-1.37349e-17		26.1914	59.1478
2349	0.0367	-0.0505		-1.37602	0	0		0.341749	0.316502		0.0125422	0.0241578	-0.0754548	0.0249548	-6.86747e-18		29.4616	56.7467
2379	0.0367	-0.058		-1.58038	0	0		0.37074	0.25852		0.0136062	0.0230938	-0.0818557	0.0238557	-2.06024e-17		32.369	54.9403
2409	0.0368	-0.0609		-1.65489	0	0		0.38131	0.23738		0.0140322	0.0227678	-0.0844189	0.0235189	6.86747e-18		33.8036	54.8476
2439	0.037	-0.0578		-1.56216	0	0		0.368155	0.26369		0.0136217	0.0233783	-0.0819495	0.0241495	-2.06024e-17		33.2234	57.0196
2469	0.0373	-0.0544		-1.45845	0	0		0.353442	0.293117		0.0131834	0.0241166	-0.0793123	0.0249123	6.86747e-18		32.5497	59.544
2499	0.0375	-0.0569		-1.51733	0	0		0.361796	0.276409		0.0135673	0.0239327	-0.0816222	0.0247222	-6.86747e-18		33.9048	59.8077
2529	0.0378	-0.0652		-1.72487	0	0		0.391237	0.217526		0.0147888	0.0230112	-0.0889704	0.0237704	0		37.4008	58.1954
2559	0.038	-0.0784		-2.06316	0	0		0.439228	0.121545		0.0166907	0.0213093	-0.100412	0.0220124	-1.37349e-17		42.7114	54.5306
2589	0.0383	-0.0941		-2.45692	0	0		0.495088	0.00982458		0.0189619	0.0193381	-0.114076	0.0199761	-2.74699e-17		49.0923	50.0664
2619	0.0385	-0.1077		-2.7974	0	0		0.54339	-0.0867792		0.0209205	0.0175795	-0.125859	0.0181595	-1.37349e-17		54.7908	46.0407
2649	0.0388	-0.1197		-3.08505	0	0		0.584196	-0.168392		0.0226668	0.0161332	-0.136365	0.0166654	-2.74699e-17		60.0444	42.7368
2679	0.0392	-0.1337		-3.41071	0	0		0.630396	-0.260791		0.0247115	0.0144885	-0.148666	0.0149665	-2.74699e-17		66.2021	38.8147
2709	0.0402	-0.151		-3.75622	0	0		0.67941	-0.35882		0.0273123	0.0128877	-0.164313	0.0133129	0		73.9889	34.9129
2739	0.0418	-0.1699		-4.06459	0	0		0.723157	-0.446313		0.0302279	0.0115721	-0.181854	0.0119538	-2.74699e-17		82.7943	31.6959
2769	0.0443	-0.1924		-4.34312	0	0		0.762668	-0.525337		0.0337862	0.0105138	-0.203261	0.0108607	-5.49398e-17		93.554	29.1127
2799	0.0473	-0.218		-4.60888	0	0		0.80037	-0.600741		0.0378575	0.00944248	-0.227754	0.009754	-2.74699e-17		105.963	26.4295
2829	0.0514	-0.2438		-4.74319	0	0		0.819424	-0.638848		0.0421184	0.0092816	-0.253388	0.00958781	-2.74699e-17		119.153	26.2576
2859	0.0562	-0.2742		-4.879	0	0		0.838691	-0.677382		0.0471344	0.00906557	-0.283565	0.00936465	0		134.757	25.9185
2889	0.0609	-0.3119		-5.12151	0	0		0.873094	-0.746187		0.0531714	0.0077286	-0.319884	0.00798357	0		153.612	22.3279
2919	0.0661	-0.3568		-5.39788	0	0		0.9123	-0.824601		0.0603031	0.00579695	-0.362788	0.00598819	-1.0988e-16		176.025	16.9213
2949	0.0725	-0.4111		-5.67034	0	0		0.950953	-0.901905		0.0689441	0.00355593	-0.414773	0.00367325	-5.49398e-17		203.316	10.4864
2979	0.0802	-0.4701		-5.8616	0	0		0.978084	-0.956168		0.0784423	0.00175766	-0.471916	0.00181565	-5.49398e-17		233.68	5.23607
3009	0.0885	-0.5275		-5.96045	0	0		0.992108	-0.984216		0.0878016	0.000698442	-0.528221	0.000721484	0		264.195	2.10161
3039	0.0966	-0.5829		-6.03416	0	0		1	-1		0.0966	0	-0.581154	0	0.00172838		293.567	0
3069	0.1057	-0.6359		-6.01608	1	-6.01608		1	-1		0.1057	0	-0.6359	0	0		324.393	0
3099	0.1163	-0.6842		-5.88306	1	-5.88306		0.981129	-0.962258		0.114105	0.00219468	-0.686467	0.00226709	0		353.612	6.80132
3129	0.1252	-0.7278		-5.8131	1	-5.8131		0.971204	-0.942408		0.121595	0.00360524	-0.731524	0.00372418	-1.0988e-16		380.47	11.2808
3159	0.1344	-0.7694		-5.7247	1	-5.7247		0.958664	-0.917328		0.128844	0.00555556	-0.775139	0.00573885	-1.0988e-16		407.02	17.55
3189	0.1438	-0.811		-5.63978	1	-5.63978		0.946616	-0.893233		0.136123	0.00767658	-0.81893	0.00792984	-3.29639e-16		434.098	24.4806
3219	0.1521	-0.8538		-5.61341	1	-5.61341		0.942876	-0.885752		0.143411	0.00868855	-0.862775	0.0089752	-1.0988e-16		461.641	27.9685
3249	0.1591	-0.897		-5.63796	1	-5.63796		0.946359	-0.892718		0.150566	0.00853429	-0.905816	0.00881584	-1.0988e-16		489.188	27.7279
3279	0.1645	-0.9334		-5.67416	1	-5.67416		0.951494	-0.902989		0.156521	0.00797916	-0.941642	0.0082424	-1.0988e-16		513.232	26.1637
3309	0.1682	-0.9595		-5.70452	1	-5.70452		0.955801	-0.911601		0.160766	0.00743434	-0.96718	0.0076796	0		531.974	24.6002
3339	0.1711	-0.9782		-5.71712	1	-5.71712		0.957589	-0.915178		0.163843	0.00725653	-0.985696	0.00749593	1.0988e-16		547.073	24.2296
3369	0.173	-0.9919		-5.73353	1	-5.73353		0.959916	-0.919831		0.166065	0.00693458	-0.999063	0.00716336	0		559.474	23.3626
3399	0.1739	-1.002		-5.76193	1	-5.76193		0.963945	-0.927891		0.16763	0.00626988	-1.00848	0.00647673	2.19759e-16		569.775	21.3113
3429	0.1743	-1.0089		-5.7883	1	-5.7883		0.967686	-0.935371		0.168668	0.00563241	-1.01472	0.00581823	0		578.361	19.3136
3459	0.174	-1.0104		-5.8069	1	-5.8069		0.970324	-0.940648		0.168836	0.00516358	-1.01573	0.00533394	-4.39518e-16		584.005	17.8608
3489	0.1728	-1.0016		-5.7963	1	-5.7963		0.96882	-0.937641		0.167412	0.00538783	-1.00717	0.00556558	0		584.101	18.7981
3519	0.171	-0.9814		-5.73918	1	-5.73918		0.960718	-0.921436		0.164283	0.00671723	-0.988339	0.00693884	-1.0988e-16		578.111	23.6379
3549	0.1687	-0.9534		-5.65145	1	-5.65145		0.948273	-0.896545		0.159974	0.00872643	-0.962414	0.00901432	0		567.746	30.9701
3579	0.1656	-0.9199		-5.55495	1	-5.55495		0.934583	-0.869165		0.154767	0.0108331	-0.931091	0.0111905	1.0988e-16		553.911	38.7717
3609	0.1619	-0.8858		-5.47128	1	-5.47128		0.922713	-0.845425		0.149387	0.0125128	-0.898726	0.0129256	-1.0988e-16		539.138	45.1588
3639	0.1567	-0.8535		-5.44671	1	-5.44671		0.919228	-0.838455		0.144043	0.012657	-0.866575	0.0130746	0		524.172	46.0589
3669	0.1502	-0.8191		-5.4534	1	-5.4534		0.920176	-0.840351		0.13821	0.0119896	-0.831485	0.0123852	-1.0988e-16		507.094	43.9899
3699	0.1432	-0.7808		-5.45251	1	-5.45251		0.920051	-0.840101		0.131751	0.0114488	-0.792626	0.0118265	-1.0988e-16		487.348	42.3489
3729	0.1363	-0.7393		-5.42406	1	-5.42406		0.916015	-0.832029		0.124853	0.0114472	-0.751125	0.0118249	0		465.576	42.6866
3759	0.1293	-0.6905		-5.34029	1	-5.34029		0.904131	-0.808262		0.116904	0.0123959	-0.703305	0.0128048	-1.0988e-16		439.443	46.5962
3789	0.1227	-0.6332		-5.16055	1	-5.16055		0.878632	-0.757265		0.107808	0.0148918	-0.648583	0.0153831	0		408.485	56.425
3819	0.116	-0.5795		-4.99569	0	0		0.855244	-0.710489		0.0992083	0.0167917	-0.596846	0.0173456	0		378.877	64.1273
3849	0.1088	-0.54		-4.96324	0	0		0.85064	-0.701281		0.0925497	0.0162503	-0.556786	0.0167865	0		356.224	62.5476
3879	0.1027	-0.5074		-4.9406	0	0		0.84743	-0.694859		0.087031	0.015669	-0.523586	0.0161859	1.0988e-16		337.593	60.7799
3909	0.097	-0.4825		-4.97423	0	0		0.8522	-0.704399		0.0826634	0.0143366	-0.49731	0.0148096	-1.64819e-16		323.131	56.0419
3939	0.0913	-0.4633		-5.07448	0	0		0.866422	-0.732843		0.0791043	0.0121957	-0.475898	0.012598	-5.49398e-17		311.592	48.0389
3969	0.0854	-0.439		-5.14052	0	0		0.87579	-0.751579		0.0747924	0.0106076	-0.449958	0.0109575	0		296.851	42.1014
3999	0.0797	-0.4078		-5.11669	0	0		0.872409	-0.744819		0.069531	0.010169	-0.418304	0.0105045	0		278.055	40.6657
4029	0.0743	-0.3748		-5.04441	0	0		0.862157	-0.724313		0.0640582	0.0102418	-0.38538	0.0105797	-5.49398e-17		258.091	41.2641
4059	0.0697	-0.3438		-4.93257	0	0		0.84629	-0.692579		0.0589864	0.0107136	-0.354867	0.0110671	0		239.426	43.4865
4089	0.0657	-0.3169		-4.82344	0	0		0.830809	-0.661617		0.0545841	0.0111159	-0.328383	0.0114826	-1.0988e-16		223.194	45.4528
4119	0.0623	-0.2959		-4.7496	0	0		0.820333	-0.640666		0.0511068	0.0111932	-0.307463	0.0115625	5.49398e-17		210.509	46.105
4149	0.0591	-0.2788		-4.71743	0	0		0.815769	-0.631539		0.048212	0.010888	-0.290047	0.0112472	0		200.031	45.1744
4179	0.0561	-0.2634		-4.69519	0	0		0.812614	-0.625228		0.0455877	0.0105123	-0.274259	0.0108592	-5.49398e-17		190.511	43.9311
4209	0.0534	-0.2482		-4.64794	0	0		0.805912	-0.611823		0.0430357	0.0103643	-0.258906	0.0107062	0		181.137	43.6234
4239	0.0512	-0.2334		-4.55859	0	0		0.793237	-0.586473		0.0406137	0.0105863	-0.244336	0.0109355	-8.24097e-17		172.162	44.8752
4269	0.0496	-0.2221		-4.47782	0	0		0.781778	-0.563557		0.0387762	0.0108238	-0.233281	0.0111809	2.74699e-17		165.536	46.2068
4299	0.0481	-0.217		-4.51143	0	0		0.786547	-0.573093		0.0378329	0.0102671	-0.227606	0.0106058	-2.74699e-17		162.644	44.1383
4329	0.0465	-0.2162		-4.64946	0	0		0.806128	-0.612255		0.0374849	0.00901507	-0.225512	0.00931248	2.74699e-17		162.272	39.0262
4359	0.0451	-0.214		-4.74501	0	0		0.819682	-0.639365		0.0369677	0.00813232	-0.222401	0.00840062	0		161.142	35.4488
4389	0.0443	-0.2085		-4.70655	0	0		0.814226	-0.628451		0.0360702	0.0082298	-0.217001	0.00850131	5.49398e-17		158.312	36.1206
4419	0.0434	-0.2028		-4.67281	0	0		0.80944	-0.61888		0.0351297	0.00827031	-0.211343	0.00854315	-5.49398e-17		155.238	36.5465
4449	0.0425	-0.1988		-4.67765	0	0		0.810126	-0.620252		0.0344304	0.00806965	-0.207136	0.00833587	-5.49398e-17		153.181	35.9019
4479	0.0415	-0.1955		-4.71084	0	0		0.814835	-0.629671		0.0338157	0.00768434	-0.203438	0.00793785	-2.74699e-17		151.46	34.4181
4509	0.0406	-0.1954		-4.81281	0	0		0.8293	-0.6586		0.0336696	0.00693041	-0.202559	0.00715905	0		151.816	31.2492
4539	0.0397	-0.2003		-5.04534	0	0		0.862288	-0.724576		0.0342328	0.00546717	-0.205948	0.00564754	0		155.383	24.8155
4569	0.039	-0.2052		-5.26154	0	0		0.892958	-0.785917		0.0348254	0.00417463	-0.209512	0.00431235	2.74699e-17		159.117	19.0739
4599	0.0383	-0.2048		-5.34726	0	0		0.905119	-0.810238		0.034666	0.00363395	-0.208554	0.00375384	-2.74699e-17		159.429	16.7125
4629	0.0377	-0.1995		-5.29178	0	0		0.897248	-0.794496		0.0338263	0.00387375	-0.203502	0.00400155	0		156.582	17.9316
4659	0.037	-0.1937		-5.23514	0	0		0.889213	-0.778425		0.0329009	0.00409913	-0.197934	0.00423437	0		153.285	19.0979
4689	0.0362	-0.1892		-5.22652	0	0		0.88799	-0.775981		0.0321453	0.00405475	-0.193389	0.00418852	0		150.729	19.0127
4719	0.0355	-0.1856		-5.22817	0	0		0.888224	-0.776449		0.031532	0.00396803	-0.189699	0.00409894	-2.74699e-17		148.799	18.7251
4749	0.0346	-0.1798		-5.19653	0	0		0.883736	-0.767473		0.0305773	0.00402272	-0.183955	0.00415544	0		145.211	19.1039
4779	0.0339	-0.172		-5.07375	0	0		0.866318	-0.732635		0.0293682	0.00453183	-0.176681	0.00468134	-2.74699e-17		140.35	21.6576
4809	0.0331	-0.1668		-5.03927	0	0		0.861427	-0.722855		0.0285132	0.00458675	-0.171538	0.00473807	0		137.12	22.0577
4839	0.0324	-0.1661		-5.12654	0	0		0.873808	-0.747615		0.0283114	0.00408864	-0.170324	0.00422352	0		136.999	19.7849
4869	0.0315	-0.1653		-5.24762	0	0		0.890984	-0.781967		0.028066	0.00343401	-0.168847	0.00354731	2.74699e-17		136.653	16.7202
4899	0.0305	-0.1582		-5.18689	0	0		0.882368	-0.764736		0.0269122	0.00358778	-0.161906	0.00370615	-2.74699e-17		131.843	17.5765
4929	0.0291	-0.144		-4.94845	0	0		0.848543	-0.697087		0.0246926	0.00440739	-0.148553	0.00455279	0		121.71	21.724
4959	0.0281	-0.1331		-4.73665	0	0		0.818497	-0.636994		0.0229998	0.00510024	-0.138368	0.0052685	-2.74699e-17		114.056	25.2921
4989	0.0272	-0.1289		-4.73897	0	0		0.818825	-0.637651		0.0222721	0.00492795	-0.133991	0.00509052	-2.74699e-17		111.115	24.5855
5019	0.0264	-0.1249		-4.73106	0	0		0.817703	-0.635407		0.0215874	0.00481263	-0.129871	0.00497141	-1.37349e-17		108.347	24.1546
5049	0.0252	-0.1185		-4.70238	0	0		0.813635	-0.62727		0.0205036	0.0046964	-0.123351	0.00485134	-2.74699e-17		103.523	23.7121
5079	0.024	-0.1096		-4.56667	0	0		0.794382	-0.588764		0.0190652	0.00493483	-0.114698	0.00509764	-2.74699e-17		96.832	25.064
5109	0.0229	-0.0991		-4.32751	0	0		0.760455	-0.520909		0.0174144	0.00548559	-0.104767	0.00566656	-2.74699e-17		88.9702	28.0259
5139	0.0216	-0.0906		-4.19444	0	0		0.741578	-0.483155		0.0160181	0.00558192	-0.0963661	0.00576608	-1.37349e-17		82.3169	28.6855
5169	0.0206	-0.084		-4.07767	0	0		0.725012	-0.450023		0.0149352	0.00566476	-0.0898516	0.00585165	0		77.2003	29.2811
5199	0.0197	-0.0789		-4.00508	0	0		0.714713	-0.429427		0.0140799	0.00562015	-0.0847056	0.00580556	-1.37349e-17		73.2012	29.2191
5229	0.0188	-0.0758		-4.03191	0	0		0.718521	-0.437041		0.0135082	0.00529181	-0.0812664	0.00546639	0		70.6343	27.6709
5259	0.0179	-0.0749		-4.18436	0	0		0.740147	-0.480293		0.0132486	0.00465138	-0.0797048	0.00480483	-2.74699e-17		69.6745	24.4616
5289	0.0171	-0.0749		-4.38012	0	0		0.767918	-0.535835		0.0131314	0.00396861	-0.0789995	0.00409954	0		69.4519	20.99
5319	0.0162	-0.0732		-4.51852	0	0		0.787552	-0.575103		0.0127583	0.00344166	-0.0767552	0.00355521	-1.37349e-17		67.8616	18.3062
5349	0.0154	-0.0689		-4.47403	0	0		0.78124	-0.562479		0.0120311	0.00336891	-0.0723801	0.00348005	-1.37349e-17		64.3543	18.0203
5379	0.0145	-0.0617		-4.25517	0	0		0.750193	-0.500385		0.0108778	0.00362221	-0.0654417	0.00374171	-1.37349e-17		58.5116	19.4839
5409	0.0138	-0.0529		-3.83333	0	0		0.690349	-0.380699		0.00952682	0.00427318	-0.0573142	0.00441415	-6.86747e-18		51.5306	23.1136
5439	0.013	-0.0449		-3.45385	0	0		0.636514	-0.273029		0.00827469	0.00472531	-0.0497812	0.00488121	-6.86747e-18		45.006	25.701
5469	0.0124	-0.0405		-3.26613	0	0		0.609884	-0.219769		0.00756257	0.00483743	-0.045497	0.00499703	-6.86747e-18		41.3597	26.4559

## Sheet: Ni(II)-Chl-a ether
Spreadsheet to evaluate maximum-possible fraction of Qx absorption and Qx-Qy gap by analytical inversion of MCD and ABS data
Source: Reimers, Cai, Kobyashi, Rätsep, Freiberg and Krausz
Enter the observed data in the blue fields incolumns A,B,C as frequency, Absorption/frequency, and MCD Delta Absorption / frequency. Assumes equally spaced in frequency (else replace all sums by integrals)
NOTE: this analysis will only work well if the data has little noise, the band tails are included, there are no interfering transitions, there is only 1 species present (eg no aggregation) and the base line is accurate.
Enter the Magnetic field strength and other factors needed to express B/D in physical units in cell D17
Data filtering parameters entered in cells M12 and O12 eliminates noise due to weak signals; a small relative error in the data inversion usually results because of this
A valid soution is obtained for any rescaling ³1 of the initial Bx/Dx beyond the value that gives maximal Dx absorption, enter a rescaling in cell M13
Yellow boxes contain intermediate and final outupts
									POOR AGREEMENT Qy(0,0) ABS & MCD !!							approx Qx-Qy unperturbed gap: Ex-Ey+lx-ly=
SUM:	31.8649	-32.848			Data Filter: Include in max/min test if relative MCD signal >							0.9	rel abs >	0.03
MAX:	0.993	0.9777			Bx/Dx from min value gives max possible Dx, rescale by (³ 1)							1						2261.31
MIN:	0.0103	-1.0719				Bx/Dx= min value			-28.5483	rescalled	-28.5483	in T^-1 =	-0.00291193			Ave E=	2566.43	305.117
						By/Dy= max value			1.02751			in T^-1 =	0.000104806
Ni(II)-Chl-a ether						fraction Qx abs =Dx/(Dx+Dy)=			0.0695961		ratio -Bx/By=		2.0783
B/D scaling to units of Tesla^-1			0.000102
Experimental Data:				DA/A				Polarization			Partitioned ABS and MCD						Ave abs energy
n	A/n	DA/n		Raw	Filter	Filtered		fr. X	LD		Ax/n	Ay/n	DAx/n	DAy/n	Rel error		Ax	Ay
-1640	0.0103	0.0001		0.00970874	0	0		0.0344133	0.931173		0.000354457	0.00994554	-0.0101191	0.0102191	-2.18732e-18		-0.581309	-16.3107
-1610	0.0107	-0.0005		-0.046729	0	0		0.0363215	0.927357		0.00038864	0.0103114	-0.011095	0.010595	-4.04591e-19		-0.625711	-16.6013
-1580	0.0113	-0.001		-0.0884956	0	0		0.0377337	0.924533		0.000426391	0.0108736	-0.0121727	0.0111727	8.09182e-19		-0.673697	-17.1803
-1550	0.0117	-0.0011		-0.0940171	0	0		0.0379204	0.924159		0.000443669	0.0112563	-0.012666	0.011566	3.03443e-18		-0.687686	-17.4473
-1520	0.0123	-0.0004		-0.0325203	0	0		0.0358411	0.928318		0.000440846	0.0118592	-0.0125854	0.0121854	-9.60903e-19		-0.670085	-18.0259
-1490	0.0128	0.0009		0.0703125	0	0		0.0323642	0.935272		0.000414261	0.0123857	-0.0118265	0.0127265	-2.02295e-19		-0.61725	-18.4548
-1460	0.0135	0.0025		0.185185	0	0		0.0284802	0.94304		0.000384482	0.0131155	-0.0109763	0.0134763	-1.21377e-18		-0.561344	-19.1487
-1430	0.0143	0.0042		0.293706	0	0		0.0248109	0.950378		0.000354796	0.0139452	-0.0101288	0.0143288	-8.09182e-19		-0.507358	-19.9416
-1400	0.0153	0.0059		0.385621	0	0		0.0217031	0.956594		0.000332058	0.0149679	-0.00947969	0.0153797	-2.42754e-18		-0.464881	-20.9551
-1370	0.0165	0.0076		0.460606	0	0		0.0191678	0.961664		0.000316269	0.0161837	-0.00902893	0.0166289	-8.09182e-19		-0.433288	-22.1717
-1340	0.0176	0.0093		0.528409	0	0		0.0168753	0.966249		0.000297005	0.017303	-0.00847898	0.017779	0		-0.397987	-23.186
-1310	0.0189	0.0109		0.57672	0	0		0.0152418	0.969516		0.000288071	0.0186119	-0.00822392	0.0191239	1.61836e-18		-0.377372	-24.3816
-1280	0.0202	0.0126		0.623762	0	0		0.0136512	0.972698		0.000275755	0.0199242	-0.00787234	0.0204723	-3.23673e-18		-0.352967	-25.503
-1250	0.0216	0.0143		0.662037	0	0		0.0123571	0.975286		0.000266914	0.0213331	-0.00761994	0.0219199	0		-0.333642	-26.6664
-1220	0.0232	0.016		0.689655	0	0		0.0114233	0.977153		0.000265021	0.022935	-0.0075659	0.0235659	0		-0.323326	-27.9807
-1190	0.0247	0.018		0.728745	0	0		0.0101016	0.979797		0.00024951	0.0244505	-0.0071231	0.0251231	3.23673e-18		-0.296917	-29.0961
-1160	0.0264	0.0199		0.753788	0	0		0.0092549	0.98149		0.000244329	0.0261557	-0.00697519	0.0268752	-3.23673e-18		-0.283422	-30.3406
-1130	0.0282	0.0218		0.77305	0	0		0.00860363	0.982793		0.000242622	0.0279574	-0.00692646	0.0287265	0		-0.274163	-31.5918
-1100	0.0302	0.0239		0.791391	0	0		0.00798349	0.984033		0.000241102	0.0299589	-0.00688304	0.030783	-3.23673e-18		-0.265212	-32.9548
-1070	0.0322	0.0258		0.801242	0	0		0.0076504	0.984699		0.000246343	0.0319537	-0.00703267	0.0328327	3.23673e-18		-0.263587	-34.1904
-1040	0.0344	0.0277		0.805233	0	0		0.00751548	0.984969		0.000258533	0.0341415	-0.00738066	0.0350807	-3.23673e-18		-0.268874	-35.5071
-1010	0.0368	0.0297		0.807065	0	0		0.00745352	0.985093		0.000274289	0.0365257	-0.0078305	0.0375305	3.23673e-18		-0.277032	-36.891
-980	0.0394	0.032		0.812183	0	0		0.00728049	0.985439		0.000286851	0.0391131	-0.00818911	0.0401891	0		-0.281114	-38.3309
-950	0.0426	0.0349		0.819249	0	0		0.00704157	0.985917		0.000299971	0.0423	-0.00856366	0.0434637	0		-0.284972	-40.185
-920	0.0468	0.038		0.811966	0	0		0.00728782	0.985424		0.00034107	0.0464589	-0.00973697	0.047737	0		-0.313784	-42.7422
-890	0.0516	0.0416		0.806202	0	0		0.00748272	0.985035		0.000386108	0.0512139	-0.0110227	0.0526227	0		-0.343636	-45.5804
-860	0.0566	0.046		0.812721	0	0		0.00726229	0.985475		0.000411046	0.056189	-0.0117347	0.0577347	0		-0.353499	-48.3225
-830	0.0623	0.0512		0.82183	0	0		0.0069543	0.986091		0.000433253	0.0618667	-0.0123686	0.0635686	-6.47345e-18		-0.3596	-51.3494
-800	0.0693	0.0585		0.844156	0	0		0.00619943	0.987601		0.00042962	0.0688704	-0.0122649	0.0707649	0		-0.343696	-55.0963
-770	0.0768	0.0677		0.88151	0	0		0.00493642	0.990127		0.000379117	0.0764209	-0.0108231	0.0785231	0		-0.29192	-58.8441
-740	0.0853	0.0765		0.896835	0	0		0.00441828	0.991163		0.00037688	0.0849231	-0.0107593	0.0872593	0		-0.278891	-62.8431
-710	0.0961	0.0842		0.876171	0	0		0.00511696	0.989766		0.00049174	0.0956083	-0.0140383	0.0982383	-1.29469e-17		-0.349136	-67.8819
-680	0.1086	0.0918		0.845304	0	0		0.00616061	0.987679		0.000669043	0.107931	-0.0191	0.1109	0		-0.454949	-73.3931
-650	0.1233	0.1021		0.828062	0	0		0.0067436	0.986513		0.000831486	0.122469	-0.0237375	0.125837	0		-0.540466	-79.6045
-620	0.1406	0.1167		0.830014	0	0		0.00667758	0.986645		0.000938867	0.139661	-0.0268031	0.143503	1.29469e-17		-0.582098	-86.5899
-590	0.1597	0.134		0.839073	0	0		0.00637128	0.987257		0.00101749	0.158683	-0.0290477	0.163048	0		-0.600321	-93.6227
-560	0.1805	0.1553		0.860388	0	0		0.0056506	0.988699		0.00101993	0.17948	-0.0291174	0.184417	2.58938e-17		-0.571163	-100.509
-530	0.2065	0.1811		0.876998	0	0		0.005089	0.989822		0.00105088	0.205449	-0.0300008	0.211101	0		-0.556966	-108.888
-500	0.238	0.2102		0.883193	0	0		0.00487952	0.990241		0.00116133	0.236839	-0.0331539	0.243354	2.58938e-17		-0.580663	-118.419
-470	0.2701	0.2462		0.911514	0	0		0.00392195	0.992156		0.00105932	0.269041	-0.0302417	0.276442	2.58938e-17		-0.497879	-126.449
-440	0.3091	0.2911		0.941766	0	0		0.00289908	0.994202		0.000896105	0.308204	-0.0255823	0.316682	0		-0.394286	-135.61
-410	0.3607	0.3405		0.943998	0	0		0.00282363	0.994353		0.00101848	0.359682	-0.029076	0.369576	0		-0.417578	-147.469
-380	0.416	0.3952		0.95	0	0		0.00262069	0.994759		0.00109021	0.41491	-0.0311235	0.426324	5.17876e-17		-0.414278	-157.666
-350	0.4731	0.4451		0.940816	0	0		0.00293122	0.994138		0.00138676	0.471713	-0.0395896	0.48469	0		-0.485365	-165.1
-320	0.535	0.4744		0.886729	0	0		0.00475997	0.99048		0.00254658	0.532453	-0.0727007	0.547101	1.03575e-16		-0.814907	-170.385
-290	0.6045	0.4928		0.815219	0	0		0.00717782	0.985644		0.00433899	0.600161	-0.123871	0.616671	-5.17876e-17		-1.25831	-174.047
-260	0.6771	0.5179		0.76488	0	0		0.00887987	0.98224		0.00601256	0.671087	-0.171648	0.689548	0		-1.56327	-174.483
-230	0.7491	0.5453		0.72794	0	0		0.0101288	0.979742		0.00758752	0.741512	-0.216611	0.761911	0		-1.74513	-170.548
-200	0.8168	0.5616		0.687561	0	0		0.0114941	0.977012		0.00938839	0.807412	-0.268023	0.829623	0		-1.87768	-161.482
-170	0.8774	0.5756		0.656029	0	0		0.0125603	0.974879		0.0110204	0.86638	-0.314613	0.890213	0		-1.87346	-147.285
-140	0.9309	0.6316		0.678483	0	0		0.0118011	0.976398		0.0109856	0.919914	-0.31362	0.94522	0		-1.53798	-128.788
-110	0.9651	0.7466		0.773599	0	0		0.00858507	0.98283		0.00828545	0.956815	-0.236536	0.983136	0		-0.9114	-105.25
-80	0.9845	0.8768		0.890604	0	0		0.00462894	0.990742		0.00455719	0.979943	-0.1301	1.0069	-1.03575e-16		-0.364575	-78.3954
-50	0.993	0.9547		0.96143	1	0.96143		0.00223422	0.995532		0.00221858	0.990781	-0.0633368	1.01804	-1.03575e-16		-0.110929	-49.5391
-20	0.9862	0.9777		0.991381	1	0.991381		0.00122154	0.997557		0.00120468	0.984995	-0.0343915	1.01209	1.03575e-16		-0.0240936	-19.6999
10	0.9611	0.9766		1.01613	1	1.01613		0.000384829	0.99923		0.000369859	0.96073	-0.0105588	0.987159	1.03575e-16		0.00369859	9.6073
40	0.9197	0.945		1.02751	1	1.02751		0	1		0	0.9197	0	0.945	0		0	36.788
70	0.8658	0.8798		1.01617	0	0		0.000383386	0.999233		0.000331936	0.865468	-0.0094762	0.889276	0		0.0232355	60.5828
100	0.8009	0.8099		1.01124	0	0		0.000550166	0.9989		0.000440628	0.800459	-0.0125792	0.822479	-2.0715e-16		0.0440628	80.0459
130	0.725	0.7459		1.02883	0	0		0	1		0	0.725	0	0.744944	-0.000891871		0	94.25
160	0.6531	0.642		0.983004	0	0		0.00150477	0.99699		0.000982766	0.652117	-0.0280563	0.670056	0		0.157243	104.339
190	0.5892	0.5123		0.869484	0	0		0.00534305	0.989314		0.00314812	0.586052	-0.0898736	0.602174	1.03575e-16		0.598143	111.35
220	0.5301	0.4406		0.831164	0	0		0.0066387	0.986723		0.00351918	0.526581	-0.100467	0.541067	0		0.774219	115.848
250	0.4767	0.409		0.857982	0	0		0.00573195	0.988536		0.00273242	0.473968	-0.0780059	0.487006	5.17876e-17		0.683105	118.492
280	0.4287	0.3793		0.884768	0	0		0.00482628	0.990347		0.00206903	0.426631	-0.0590672	0.438367	0		0.579327	119.457
310	0.3849	0.3375		0.876851	0	0		0.00509396	0.989812		0.00196066	0.382939	-0.0559736	0.393474	0		0.607806	118.711
340	0.346	0.2878		0.831792	0	0		0.00661747	0.986765		0.00228965	0.34371	-0.0653655	0.353165	0		0.778479	116.862
370	0.3134	0.2455		0.783344	0	0		0.00825557	0.983489		0.00258729	0.310813	-0.0738628	0.319363	-2.58938e-17		0.957299	115.001
400	0.2857	0.2168		0.758838	0	0		0.00908415	0.981832		0.00259534	0.283105	-0.0740926	0.290893	5.17876e-17		1.03814	113.242
430	0.2622	0.1948		0.742944	0	0		0.00962154	0.980757		0.00252277	0.259677	-0.0720207	0.266821	2.58938e-17		1.08479	111.661
460	0.2421	0.1766		0.729451	0	0		0.0100778	0.979844		0.00243983	0.23966	-0.069653	0.246253	-2.58938e-17		1.12232	110.244
490	0.2268	0.1629		0.718254	0	0		0.0104564	0.979087		0.0023715	0.224428	-0.0677023	0.230602	0		1.16204	109.97
520	0.2142	0.1515		0.707283	0	0		0.0108273	0.978345		0.00231921	0.211881	-0.0662094	0.217709	-2.58938e-17		1.20599	110.178
550	0.2048	0.1379		0.67334	0	0		0.011975	0.97605		0.00245247	0.202348	-0.0700139	0.207914	2.58938e-17		1.34886	111.291
580	0.1974	0.1201		0.608409	0	0		0.0141704	0.971659		0.00279723	0.194603	-0.0798561	0.199956	0		1.62239	112.87
610	0.1909	0.1023		0.535883	0	0		0.0166226	0.966755		0.00317325	0.187727	-0.0905909	0.192891	1.29469e-17		1.93568	114.513
640	0.1852	0.0889		0.480022	0	0		0.0185113	0.962977		0.0034283	0.181772	-0.0978721	0.186772	0		2.19411	116.334
670	0.1797	0.0779		0.4335	0	0		0.0200843	0.959831		0.00360914	0.176091	-0.103035	0.180935	0		2.41813	117.981
700	0.1753	0.0664		0.378779	0	0		0.0219345	0.956131		0.00384511	0.171455	-0.109771	0.176171	0		2.69158	120.018
730	0.1725	0.0527		0.305507	0	0		0.0244119	0.951176		0.00421105	0.168289	-0.120218	0.172918	2.58938e-17		3.07407	122.851
760	0.1702	0.0381		0.223854	0	0		0.0271727	0.945655		0.00462479	0.165575	-0.13203	0.17013	1.94204e-17		3.51484	125.837
790	0.1681	0.0259		0.154075	0	0		0.029532	0.940936		0.00496434	0.163136	-0.141723	0.167623	6.47345e-18		3.92183	128.877
820	0.1661	0.0132		0.0794702	0	0		0.0320545	0.935891		0.00532426	0.160776	-0.151999	0.165199	-9.71018e-18		4.36589	131.836
850	0.1651	0.0001		0.000605694	0	0		0.0347211	0.930558		0.00573245	0.159368	-0.163652	0.163752	-3.61729e-17		4.87258	135.462
880	0.1647	-0.0112		-0.0680024	0	0		0.0370408	0.925918		0.00610062	0.158599	-0.174162	0.162962	-4.04591e-17		5.36855	139.567
910	0.165	-0.0217		-0.131515	0	0		0.0391883	0.921623		0.00646606	0.158534	-0.184595	0.162895	3.23673e-18		5.88412	144.266
940	0.1652	-0.0332		-0.200969	0	0		0.0415366	0.916927		0.00686184	0.158338	-0.195894	0.162694	-6.47345e-18		6.45013	148.838
970	0.1656	-0.0474		-0.286232	0	0		0.0444194	0.911161		0.00735586	0.158244	-0.209997	0.162597	0		7.13518	153.497
1000	0.166	-0.0619		-0.372892	0	0		0.0473495	0.905301		0.00786002	0.15814	-0.22439	0.16249	-3.88407e-17		7.86002	158.14
1030	0.1664	-0.0771		-0.463341	0	0		0.0504078	0.899184		0.00838785	0.158012	-0.239459	0.162359	0		8.63949	162.753
1060	0.1668	-0.0945		-0.566547	0	0		0.0538973	0.892205		0.00899007	0.15781	-0.256651	0.162151	-5.17876e-17		9.52947	167.279
1090	0.1668	-0.1116		-0.669065	0	0		0.0573636	0.885273		0.00956824	0.157232	-0.273157	0.161557	-5.17876e-17		10.4294	171.383
1120	0.1662	-0.1267		-0.762335	0	0		0.0605172	0.878966		0.010058	0.156142	-0.287137	0.160437	-2.58938e-17		11.2649	174.879
1150	0.1652	-0.1421		-0.860169	0	0		0.0638251	0.87235		0.0105439	0.154656	-0.301011	0.158911	2.58938e-17		12.1255	177.855
1180	0.1638	-0.1593		-0.972527	0	0		0.0676241	0.864752		0.0110768	0.152723	-0.316224	0.156924	2.58938e-17		13.0707	180.213
1210	0.1624	-0.1776		-1.0936	0	0		0.0717176	0.856565		0.0116469	0.150753	-0.3325	0.1549	-2.58938e-17		14.0928	182.411
1240	0.1606	-0.195		-1.2142	0	0		0.0757953	0.848409		0.0121727	0.148427	-0.34751	0.15251	-5.17876e-17		15.0942	184.05
1270	0.1573	-0.2122		-1.34901	0	0		0.0803536	0.839293		0.0126396	0.14466	-0.36084	0.14864	-2.58938e-17		16.0523	183.719
1300	0.1518	-0.2266		-1.49275	0	0		0.0852137	0.829573		0.0129354	0.138865	-0.369285	0.142685	7.76814e-17		16.8161	180.524
1330	0.1466	-0.2353		-1.60505	0	0		0.0890105	0.821979		0.0130489	0.133551	-0.372525	0.137225	-7.76814e-17		17.3551	177.623
1360	0.1419	-0.2411		-1.69908	0	0		0.09219	0.81562		0.0130818	0.128818	-0.373462	0.132362	2.58938e-17		17.7912	175.193
1390	0.1365	-0.2449		-1.79414	0	0		0.0954039	0.809192		0.0130226	0.123477	-0.371774	0.126874	0		18.1015	171.634
1420	0.1304	-0.2451		-1.8796	0	0		0.0982935	0.803413		0.0128175	0.117583	-0.365917	0.120817	-2.58938e-17		18.2008	166.967
1450	0.1254	-0.2416		-1.92663	0	0		0.0998838	0.800232		0.0125254	0.112875	-0.35758	0.11598	-2.58938e-17		18.1619	163.668
1480	0.1205	-0.2373		-1.96929	0	0		0.101326	0.797348		0.0122098	0.10829	-0.348569	0.111269	5.17876e-17		18.0705	160.269
1510	0.1153	-0.2345		-2.03382	0	0		0.103508	0.792984		0.0119345	0.103366	-0.340709	0.106209	-2.58938e-17		18.0211	156.082
1540	0.1095	-0.2334		-2.13151	0	0		0.106811	0.786378		0.0116958	0.0978042	-0.333895	0.100495	0		18.0115	150.618
1570	0.1018	-0.2334		-2.29273	0	0		0.112262	0.775476		0.0114283	0.0903717	-0.326258	0.0928578	0		17.9424	141.884
1600	0.0946	-0.2336		-2.46934	0	0		0.118234	0.763533		0.0111849	0.0834151	-0.31931	0.0857098	5.17876e-17		17.8958	133.464
1630	0.0897	-0.2337		-2.60535	0	0		0.122832	0.754336		0.011018	0.078682	-0.314546	0.0808464	2.58938e-17		17.9594	128.252
1660	0.0853	-0.2339		-2.74209	0	0		0.127455	0.745089		0.0108719	0.0744281	-0.310375	0.0764755	-2.58938e-17		18.0474	123.551
1690	0.0792	-0.2342		-2.95707	0	0		0.134724	0.730551		0.0106702	0.0685298	-0.304615	0.070415	0		18.0326	115.815
1720	0.073	-0.2344		-3.21096	0	0		0.143309	0.713383		0.0104615	0.0625385	-0.298659	0.0642588	2.58938e-17		17.9938	107.566
1750	0.069	-0.2347		-3.40145	0	0		0.149749	0.700501		0.0103327	0.0586673	-0.294981	0.0602812	0		18.0822	102.668
1780	0.0654	-0.2349		-3.59174	0	0		0.156183	0.687633		0.0102144	0.0551856	-0.291604	0.0567037	-2.58938e-17		18.1816	98.2304
1810	0.06	-0.2353		-3.92167	0	0		0.167339	0.665323		0.0100403	0.0499597	-0.286634	0.051334	0		18.173	90.427
1840	0.0553	-0.2366		-4.27848	0	0		0.179403	0.641194		0.00992099	0.045379	-0.283227	0.0466273	2.58938e-17		18.2546	83.4974
1870	0.0525	-0.2394		-4.56	0	0		0.188922	0.622157		0.00991839	0.0425816	-0.283153	0.043753	-2.58938e-17		18.5474	79.6276
1900	0.0501	-0.244		-4.87026	0	0		0.199412	0.601176		0.00999054	0.0401095	-0.285213	0.0412128	0		18.982	76.208
1930	0.0481	-0.2497		-5.19127	0	0		0.210266	0.579469		0.0101138	0.0379862	-0.288731	0.0390312	-2.58938e-17		19.5196	73.3134
1960	0.0465	-0.256		-5.50538	0	0		0.220886	0.558228		0.0102712	0.0362288	-0.293225	0.0372254	-5.17876e-17		20.1316	71.0084
1990	0.0452	-0.2628		-5.81416	0	0		0.231327	0.537347		0.010456	0.034744	-0.2985	0.0356998	5.17876e-17		20.8074	69.1406
2020	0.0444	-0.2711		-6.10586	0	0		0.241189	0.517622		0.0107088	0.0336912	-0.305718	0.034618	0		21.6318	68.0562
2050	0.0439	-0.2831		-6.44875	0	0		0.252783	0.494434		0.0110972	0.0328028	-0.316805	0.0337052	0		22.7492	67.2458
2080	0.0436	-0.2991		-6.86009	0	0		0.266691	0.466618		0.0116277	0.0319723	-0.331952	0.0328518	0		24.1857	66.5023
2110	0.0432	-0.3159		-7.3125	0	0		0.281988	0.436025		0.0121819	0.0310181	-0.347771	0.0318714	5.17876e-17		25.7037	65.4483
2140	0.0429	-0.3347		-7.80186	0	0		0.298534	0.402933		0.0128071	0.0300929	-0.365621	0.0309207	5.17876e-17		27.4072	64.3988
2170	0.0426	-0.3611		-8.47653	0	0		0.321345	0.35731		0.0136893	0.0289107	-0.390806	0.029706	0		29.7058	62.7362
2200	0.0423	-0.3871		-9.1513	0	0		0.34416	0.31168		0.014558	0.027742	-0.415605	0.0285052	0		32.0275	61.0325
2230	0.0419	-0.4052		-9.67064	0	0		0.36172	0.27656		0.0151561	0.0267439	-0.43268	0.0274796	0		33.798	59.639
2260	0.0417	-0.4224		-10.1295	0	0		0.377234	0.245532		0.0157307	0.0259693	-0.449084	0.0266837	0		35.5513	58.6907
2290	0.0416	-0.4403		-10.5841	0	0		0.392606	0.214788		0.0163324	0.0252676	-0.466263	0.0259627	0		37.4012	57.8628
2320	0.0416	-0.4573		-10.9928	0	0		0.406423	0.187153		0.0169072	0.0246928	-0.482672	0.0253721	0		39.2247	57.2873
2350	0.0417	-0.4785		-11.4748	0	0		0.422722	0.154557		0.0176275	0.0240725	-0.503235	0.0247347	-5.17876e-17		41.4246	56.5704
2380	0.0417	-0.5039		-12.0839	0	0		0.443316	0.113367		0.0184863	0.0232137	-0.527752	0.0238523	0		43.9974	55.2486
2410	0.0417	-0.5251		-12.5923	0	0		0.460506	0.078988		0.0192031	0.0224969	-0.548216	0.0231158	0		46.2795	54.2175
2440	0.0418	-0.5489		-13.1316	0	0		0.478739	0.0425222		0.0200113	0.0217887	-0.571288	0.0223881	0		48.8275	53.1645
2470	0.0418	-0.5748		-13.7512	0	0		0.499689	0.000621932		0.020887	0.020913	-0.596288	0.0214883	1.03575e-16		51.5909	51.6551
2500	0.0419	-0.5963		-14.2315	0	0		0.515929	-0.0318578		0.0216174	0.0202826	-0.617141	0.0208405	-1.03575e-16		54.0436	50.7064
2530	0.0419	-0.6185		-14.7613	0	0		0.533843	-0.0676866		0.022368	0.019532	-0.638569	0.0200693	0		56.5911	49.4159
2560	0.042	-0.644		-15.3333	0	0		0.553183	-0.106367		0.0232337	0.0187663	-0.663283	0.0192825	0		59.4783	48.0417
2590	0.042	-0.6705		-15.9643	0	0		0.574517	-0.149033		0.0241297	0.0178703	-0.688862	0.0183619	0		62.4959	46.2841
2620	0.0419	-0.6949		-16.5847	0	0		0.595495	-0.190989		0.0249512	0.0169488	-0.712315	0.017415	0		65.3722	44.4058
2650	0.042	-0.7211		-17.169	0	0		0.615251	-0.230503		0.0258406	0.0161594	-0.737704	0.016604	0		68.4775	42.8225
2680	0.042	-0.7516		-17.8952	0	0		0.639805	-0.27961		0.0268718	0.0151282	-0.767144	0.0155444	0		72.0164	40.5436
2710	0.0421	-0.7797		-18.5202	0	0		0.660935	-0.321871		0.0278254	0.0142746	-0.794367	0.0146673	1.03575e-16		75.4068	38.6842
2740	0.042	-0.808		-19.2381	0	0		0.685209	-0.370418		0.0287788	0.0132212	-0.821585	0.0135849	0		78.8538	36.2262
2770	0.042	-0.8427		-20.0643	0	0		0.713144	-0.426287		0.029952	0.012048	-0.855079	0.0123794	0		82.9671	33.3729
2800	0.0421	-0.8841		-21	0	0		0.744781	-0.489563		0.0313553	0.0107447	-0.89514	0.0110403	1.03575e-16		87.7948	30.0852
2830	0.0421	-0.916		-21.7577	0	0		0.770401	-0.540802		0.0324339	0.00966612	-0.925932	0.00993202	-1.03575e-16		91.7879	27.3551
2860	0.0422	-0.9461		-22.4194	0	0		0.792774	-0.585549		0.0334551	0.00874492	-0.955085	0.00898548	0		95.6815	25.0105
2890	0.0422	-0.9825		-23.282	1	-23.282		0.821939	-0.643877		0.0346858	0.00751419	-0.990221	0.00772089	0		100.242	21.716
2920	0.0423	-1.01		-23.8771	1	-23.8771		0.842059	-0.684118		0.0356191	0.0066809	-1.01686	0.00686468	0		104.008	19.5082
2950	0.0423	-1.0303		-24.357	1	-24.357		0.858285	-0.716571		0.0363055	0.00599452	-1.03646	0.00615943	0		107.101	17.6838
2980	0.0422	-1.0467		-24.8033	1	-24.8033		0.873377	-0.746754		0.0368565	0.00534349	-1.05219	0.00549049	0		109.832	15.9236
3010	0.042	-1.057		-25.1667	1	-25.1667		0.885662	-0.771325		0.0371978	0.00480218	-1.06193	0.00493429	0		111.965	14.4546
3040	0.0415	-1.0647		-25.6554	1	-25.6554		0.902188	-0.804376		0.0374408	0.00405921	-1.06887	0.00417087	0		113.82	12.34
3070	0.0408	-1.0702		-26.2304	1	-26.2304		0.921628	-0.843257		0.0376024	0.00319756	-1.07349	0.00328552	0		115.439	9.81651
3100	0.04	-1.0719		-26.7975	1	-26.7975		0.940803	-0.881606		0.0376321	0.00236788	-1.07433	0.00243301	0		116.66	7.34041
3130	0.0391	-1.071		-27.3913	1	-27.3913		0.96088	-0.921761		0.0375704	0.00152957	-1.07257	0.00157165	0		117.595	4.78756
3160	0.0383	-1.0667		-27.8512	1	-27.8512		0.976429	-0.952859		0.0373972	0.000902755	-1.06763	0.000927589	0		118.175	2.85271
3190	0.0374	-1.0555		-28.2219	1	-28.2219		0.988965	-0.97793		0.0369873	0.000412711	-1.05592	0.000424064	0		117.989	1.31655
3220	0.0365	-1.0346		-28.3452	1	-28.3452		0.993133	-0.986266		0.0362494	0.000250637	-1.03486	0.000257532	0		116.723	0.80705
3250	0.0352	-1.0049		-28.5483	1	-28.5483		1	-1		0.0352	0	-1.0049	0	0		114.4	0
3280	0.034	-0.969		-28.5	1	-28.5		0.998367	-0.996734		0.0339445	5.55199e-05	-0.969057	5.70472e-05	0		111.338	0.182105
3310	0.0327	-0.9285		-28.3945	0	0		0.9948	-0.9896		0.03253	0.000170046	-0.928675	0.000174724	1.03575e-16		107.674	0.562854
3340	0.0314	-0.8848		-28.1783	0	0		0.987491	-0.974983		0.0310072	0.00039277	-0.885204	0.000403574	0		103.564	1.31185
3370	0.0302	-0.8389		-27.7781	0	0		0.97396	-0.94792		0.0294136	0.000786404	-0.839708	0.000808037	-1.03575e-16		99.1238	2.65018
3400	0.0289	-0.7906		-27.3564	0	0		0.9597	-0.919401		0.0277353	0.00116466	-0.791797	0.0011967	0		94.3002	3.95984
3430	0.0278	-0.7389		-26.5791	0	0		0.93342	-0.86684		0.0259491	0.00185093	-0.740802	0.00190184	0		89.0053	6.34867
3460	0.0268	-0.6897		-25.7351	0	0		0.904881	-0.809762		0.0242508	0.00254919	-0.692319	0.00261931	0		83.9078	8.82019
3490	0.0259	-0.6412		-24.7568	0	0		0.871803	-0.743605		0.0225797	0.00332031	-0.644612	0.00341165	0		78.8031	11.5879
3520	0.0252	-0.5953		-23.623	0	0		0.833469	-0.666939		0.0210034	0.00419657	-0.599612	0.00431202	1.03575e-16		73.9321	14.7719
3550	0.0244	-0.5616		-23.0164	0	0		0.812959	-0.625917		0.0198362	0.00456381	-0.566289	0.00468936	0		70.4185	16.2015
3580	0.0238	-0.5328		-22.3866	0	0		0.791663	-0.583326		0.0188416	0.00495843	-0.537895	0.00509483	0		67.4528	17.7512
3610	0.023	-0.5035		-21.8913	0	0		0.774918	-0.549835		0.0178231	0.00517689	-0.508819	0.0053193	0		64.3414	18.6886
3640	0.0223	-0.4746		-21.2825	0	0		0.754334	-0.508667		0.0168216	0.00547836	-0.480229	0.00562907	-5.17876e-17		61.2308	19.9412
3670	0.0216	-0.4442		-20.5648	0	0		0.730067	-0.460134		0.0157695	0.00583055	-0.450191	0.00599094	0		57.8739	21.3981
3700	0.0209	-0.4139		-19.8038	0	0		0.704337	-0.408674		0.0147206	0.00617935	-0.420249	0.00634934	0		54.4664	22.8636
3730	0.0207	-0.3846		-18.5797	0	0		0.662948	-0.325896		0.013723	0.00697698	-0.391769	0.00716891	5.17876e-17		51.1869	26.0241
3760	0.0206	-0.3544		-17.2039	0	0		0.616429	-0.232859		0.0126984	0.00790156	-0.362519	0.00811892	5.17876e-17		47.7461	29.7099
3790	0.0209	-0.3267		-15.6316	0	0		0.563267	-0.126535		0.0117723	0.00912771	-0.336079	0.0093788	5.17876e-17		44.617	34.594
3820	0.0211	-0.3015		-14.2891	0	0		0.517876	-0.0357526		0.0109272	0.0101728	-0.311953	0.0104527	0		41.7419	38.8601
3850	0.0215	-0.2782		-12.9395	0	0		0.472246	0.0555088		0.0101533	0.0113467	-0.289859	0.0116589	0		39.0901	43.6849
3880	0.0217	-0.2551		-11.7558	0	0		0.432221	0.135559		0.00937919	0.0123208	-0.26776	0.0126597	0		36.3912	47.8048
3910	0.022	-0.2382		-10.8273	0	0		0.400827	0.198346		0.00881819	0.0131818	-0.251744	0.0135444	0		34.4791	51.5409
3940	0.0223	-0.2289		-10.2646	0	0		0.381801	0.236397		0.00851417	0.0137858	-0.243065	0.0141651	-2.58938e-17		33.5458	54.3162
3970	0.0226	-0.2213		-9.79204	0	0		0.365824	0.268352		0.00826763	0.0143324	-0.236027	0.0147266	0		32.8225	56.8995
4000	0.023	-0.2125		-9.23913	0	0		0.34713	0.305741		0.00798398	0.015016	-0.227929	0.0154291	0		31.9359	60.0641
4030	0.0234	-0.2024		-8.64957	0	0		0.327196	0.345608		0.00765638	0.0157436	-0.218577	0.0161767	-2.58938e-17		30.8552	63.4468
4060	0.0241	-0.193		-8.0083	0	0		0.305514	0.388973		0.00736288	0.0167371	-0.210198	0.0171975	-2.58938e-17		29.8933	67.9527
4090	0.0251	-0.1839		-7.32669	0	0		0.282467	0.435065		0.00708993	0.0180101	-0.202406	0.0185055	-2.58938e-17		28.9978	73.6612
4120	0.026	-0.175		-6.73077	0	0		0.262318	0.475363		0.00682028	0.0191797	-0.194707	0.0197073	0		28.0995	79.0205
4150	0.0271	-0.1689		-6.23247	0	0		0.24547	0.509059		0.00665224	0.0204478	-0.18991	0.0210103	0		27.6068	84.8582
4180	0.0279	-0.1643		-5.88889	0	0		0.233853	0.532294		0.00652451	0.0213755	-0.186264	0.0219635	0		27.2724	89.3496
4210	0.0288	-0.1598		-5.54861	0	0		0.222348	0.555304		0.00640362	0.0223964	-0.182812	0.0230125	-2.58938e-17		26.9592	94.2888
4240	0.0294	-0.1545		-5.2551	0	0		0.212424	0.575152		0.00624527	0.0231547	-0.178292	0.0237917	-2.58938e-17		26.4799	98.1761
4270	0.03	-0.1479		-4.93	0	0		0.201432	0.597136		0.00604296	0.023957	-0.172516	0.0246161	0		25.8034	102.297
4300	0.0307	-0.14		-4.56026	0	0		0.18893	0.622139		0.00580016	0.0248998	-0.165585	0.0255848	-2.58938e-17		24.9407	107.069
4330	0.0312	-0.132		-4.23077	0	0		0.17779	0.64442		0.00554704	0.025653	-0.158359	0.0263586	0		24.0187	111.077
4360	0.0319	-0.1252		-3.92476	0	0		0.167443	0.665113		0.00534145	0.0265586	-0.152489	0.0272892	-2.58938e-17		23.2887	115.795
4390	0.0324	-0.1206		-3.72222	0	0		0.160595	0.67881		0.00520328	0.0271967	-0.148545	0.0279449	-1.29469e-17		22.8424	119.394
4420	0.0327	-0.1174		-3.59021	0	0		0.156132	0.687736		0.00510551	0.0275945	-0.145754	0.0283536	-2.58938e-17		22.5664	121.968
4450	0.033	-0.1146		-3.47273	0	0		0.152159	0.695681		0.00502126	0.0279787	-0.143348	0.0287484	1.29469e-17		22.3446	124.505
4480	0.0331	-0.1112		-3.35952	0	0		0.148332	0.703337		0.00490978	0.0281902	-0.140166	0.0289657	1.29469e-17		21.9958	126.292
4510	0.0332	-0.1064		-3.20482	0	0		0.143101	0.713798		0.00475095	0.028449	-0.135632	0.0292316	1.29469e-17		21.4268	128.305
4540	0.0332	-0.0994		-2.99398	0	0		0.135972	0.728056		0.00451427	0.0286857	-0.128875	0.0294748	1.29469e-17		20.4948	130.233
4570	0.0333	-0.0908		-2.72673	0	0		0.126936	0.746128		0.00422697	0.029073	-0.120673	0.0298728	-1.29469e-17		19.3173	132.864
4600	0.0333	-0.082		-2.46246	0	0		0.118001	0.763998		0.00392943	0.0293706	-0.112179	0.0301785	-1.29469e-17		18.0754	135.105
4630	0.0332	-0.0742		-2.23494	0	0		0.110308	0.779384		0.00366223	0.0295378	-0.10455	0.0303503	-1.29469e-17		16.9561	136.76

## Sheet: Zn(II)-Chl-a ether
Spreadsheet to evaluate maximum-possible fraction of Qx absorption and Qx-Qy gap by analytical inversion of MCD and ABS data
Source: Reimers, Cai, Kobyashi, Rätsep, Freiberg and Krausz
Enter the observed data in the blue fields incolumns A,B,C as frequency, Absorption/frequency, and MCD Delta Absorption / frequency. Assumes equally spaced in frequency (else replace all sums by integrals)
NOTE: this analysis will only work well if the data has little noise, the band tails are included, there are no interfering transitions, there is only 1 species present (eg no aggregation) and the base line is accurate.
Enter the Magnetic field strength and other factors needed to express B/D in physical units in cell D17
Data filtering parameters entered in cells M12 and O12 eliminates noise due to weak signals; a small relative error in the data inversion usually results because of this
A valid soution is obtained for any rescaling ³1 of the initial Bx/Dx beyond the value that gives maximal Dx absorption, enter a rescaling in cell M13
Yellow boxes contain intermediate and final outupts
																approx Qx-Qy unperturbed gap: Ex-Ey+lx-ly=
SUM:	24.0766	-16.3009			Data Filter: Include in max/min test if relative MCD signal >							0.6	rel abs >	0.03
MAX:	0.993	0.9883			Bx/Dx from min value gives max possible Dx, rescale by (³ 1)							1						1726.11
MIN:	0.0117	-0.7787				Bx/Dx= min value			-13.4118	rescalled	-13.4118	in T^-1 =	-0.00260188			Ave E=	2062.21	336.102
						By/Dy= max value			1.07696			in T^-1 =	0.000208931
Chlorin-e6 TME dioxane						fraction Qx abs =Dx/(Dx+Dy)=			0.12106		ratio -Bx/By=		1.71525
B/D scaling to units of Tesla^-1			0.000194
Experimental Data:				DA/A				Polarization			Partitioned ABS and MCD						Ave abs energy
n	A/n	DA/n		Raw	Filter	Filtered		fr. X	LD		Ax/n	Ay/n	DAx/n	DAy/n	Rel error		Ax	Ay
-757	0.0117	0.0262		2.23932	0	0		0	1		0	0.0117	0	0.0126005	-0.0137605		0	-8.8569
-727	0.0143	0.0277		1.93706	0	0		0	1		0	0.0143	0	0.0154006	-0.012445		0	-10.3961
-697	0.0174	0.0294		1.68966	0	0		0	1		0	0.0174	0	0.0187391	-0.0107871		0	-12.1278
-667	0.0209	0.0319		1.52632	0	0		0	1		0	0.0209	0	0.0225085	-0.00950267		0	-13.9403
-637	0.0258	0.0365		1.41473	0	0		0	1		0	0.0258	0	0.0277856	-0.00881754		0	-16.4346
-607	0.0326	0.044		1.34969	0	0		0	1		0	0.0326	0	0.035109	-0.00899629		0	-19.7882
-577	0.0422	0.0536		1.27014	0	0		0	1		0	0.0422	0	0.0454478	-0.0082487		0	-24.3494
-547	0.0546	0.0656		1.20147	0	0		0	1		0	0.0546	0	0.0588021	-0.00687834		0	-29.8662
-517	0.0695	0.0839		1.20719	0	0		0	1		0	0.0695	0	0.0748489	-0.00915827		0	-35.9315
-487	0.0879	0.1086		1.23549	0	0		0	1		0	0.0879	0	0.094665	-0.0141		0	-42.8073
-457	0.1132	0.1384		1.22261	0	0		0	1		0	0.1132	0	0.121912	-0.0166831		0	-51.7324
-427	0.1505	0.177		1.17608	0	0		0	1		0	0.1505	0	0.162083	-0.0150938		0	-64.2635
-397	0.2027	0.2224		1.09719	0	0		0	1		0	0.2027	0	0.2183	-0.00414828		0	-80.4719
-367	0.2697	0.2726		1.01075	0	0		0.00456973	0.990861		0.00123246	0.268468	-0.0165294	0.289129	-5.61683e-17		-0.452312	-98.5276
-337	0.3523	0.3297		0.93585	0	0		0.00973944	0.980521		0.00343121	0.348869	-0.0460185	0.375719	5.61683e-17		-1.15632	-117.569
-307	0.4441	0.3951		0.889664	0	0		0.0129271	0.974146		0.00574094	0.438359	-0.0769962	0.472096	5.61683e-17		-1.76247	-134.576
-277	0.5378	0.4816		0.8955	0	0		0.0125244	0.974951		0.0067356	0.531064	-0.0903363	0.571936	5.61683e-17		-1.86576	-147.105
-247	0.6332	0.6046		0.954833	1	0.954833		0.00842929	0.983141		0.00533743	0.627863	-0.0715843	0.676184	0		-1.31834	-155.082
-217	0.7402	0.7512		1.01486	1	1.01486		0.00428619	0.991428		0.00317264	0.737027	-0.0425507	0.793751	1.12337e-16		-0.688462	-159.935
-187	0.851	0.879		1.0329	1	1.0329		0.00304097	0.993918		0.00258787	0.848412	-0.0347079	0.913708	1.12337e-16		-0.483931	-158.653
-157	0.9263	0.9601		1.03649	1	1.03649		0.00279341	0.994413		0.00258754	0.923712	-0.0347035	0.994803	0		-0.406244	-145.023
-127	0.9682	0.9883		1.02076	1	1.02076		0.00387902	0.992242		0.00375567	0.964444	-0.0503702	1.03867	0		-0.47697	-122.484
-97	0.9913	0.9852		0.993846	1	0.993846		0.00573659	0.988527		0.00568668	0.985613	-0.0762684	1.06147	1.12337e-16		-0.551608	-95.6045
-67	0.993	0.9717		0.97855	1	0.97855		0.00679235	0.986415		0.0067448	0.986255	-0.0904597	1.06216	0		-0.451902	-66.0791
-37	0.969	0.9468		0.97709	1	0.97709		0.00689312	0.986214		0.00667943	0.962321	-0.089583	1.03638	1.12337e-16		-0.247139	-35.6059
-7	0.9195	0.9115		0.9913	1	0.9913		0.00591237	0.988175		0.00543642	0.914064	-0.072912	0.984412	0		-0.0380549	-6.39845
23	0.8509	0.8611		1.01199	1	1.01199		0.00448452	0.991031		0.00381588	0.847084	-0.0511777	0.912278	1.12337e-16		0.0877652	19.4829
53	0.7753	0.7943		1.02451	1	1.02451		0.00362045	0.992759		0.00280693	0.772493	-0.0376459	0.831946	0		0.148767	40.9421
83	0.6882	0.72		1.04621	1	1.04621		0.00212267	0.995755		0.00146082	0.686739	-0.0195922	0.739592	1.12337e-16		0.121248	56.9994
113	0.5886	0.6339		1.07696	1	1.07696		0	1		0	0.5886	0	0.6339	0		0	66.5118
143	0.4996	0.5396		1.08006	0	0		0	1		0	0.4996	0	0.53805	-0.00156799		0	71.4428
173	0.4211	0.4552		1.08098	0	0		0	1		0	0.4211	0	0.453509	-0.0017112		0	72.8503
203	0.3565	0.3876		1.08724	0	0		0	1		0	0.3565	0	0.383937	-0.00370631		0	72.3695
233	0.3078	0.33		1.07212	0	0		0.000333882	0.999332		0.000102769	0.307697	-0.00137831	0.331378	0		0.0239452	71.6935
263	0.2703	0.2813		1.0407	0	0		0.0025031	0.994994		0.000676588	0.269623	-0.00907424	0.290374	-5.61683e-17		0.177943	70.911
293	0.2375	0.2417		1.01768	0	0		0.00409132	0.991817		0.000971689	0.236528	-0.0130321	0.254732	-2.80842e-17		0.284705	69.3028
323	0.2092	0.207		0.989484	0	0		0.0060377	0.987925		0.00126309	0.207937	-0.0169402	0.22394	-2.80842e-17		0.407977	67.1636
353	0.188	0.176		0.93617	0	0		0.00971735	0.980565		0.00182686	0.186173	-0.0245014	0.200501	0		0.644882	65.7191
383	0.1687	0.1492		0.88441	0	0		0.0132898	0.97342		0.00224199	0.166458	-0.030069	0.179269	0		0.858681	63.7534
413	0.1508	0.1259		0.834881	0	0		0.0167083	0.966583		0.00251961	0.14828	-0.0337924	0.159692	0		1.0406	61.2398
443	0.1369	0.105		0.766983	0	0		0.0213945	0.957211		0.00292891	0.133971	-0.0392818	0.144282	-1.40421e-17		1.29751	59.3492
473	0.1263	0.0848		0.671417	0	0		0.0279904	0.944019		0.00353519	0.122765	-0.0474131	0.132213	1.40421e-17		1.67214	58.0678
503	0.1184	0.0693		0.585304	0	0		0.0339338	0.932132		0.00401777	0.114382	-0.0538854	0.123185	0		2.02094	57.5343
533	0.1132	0.0564		0.498233	0	0		0.0399434	0.920113		0.00452159	0.108678	-0.0606425	0.117043	0		2.41001	57.9256
563	0.1093	0.0416		0.380604	0	0		0.0480621	0.903876		0.00525319	0.104047	-0.0704545	0.112054	0		2.95754	58.5784
593	0.1058	0.0256		0.241966	0	0		0.0576308	0.884738		0.00609733	0.0997027	-0.081776	0.107376	1.05316e-17		3.61572	59.1237
623	0.1024	0.0094		0.0917969	0	0		0.0679953	0.864009		0.00696272	0.0954373	-0.0933824	0.102782	5.26578e-18		4.33777	59.4574
653	0.1003	-0.0108		-0.107677	0	0		0.0817628	0.836474		0.00820081	0.0920992	-0.109987	0.0991874	2.45736e-17		5.35513	60.1408
683	0.0997	-0.0309		-0.30993	0	0		0.0957221	0.808556		0.0095435	0.0901565	-0.127995	0.0970952	3.15947e-17		6.51821	61.5769
713	0.1001	-0.0488		-0.487512	0	0		0.107979	0.784042		0.0108087	0.0892913	-0.144963	0.0961634	2.10631e-17		7.70658	63.6647
743	0.101	-0.0738		-0.730693	0	0		0.124763	0.750474		0.0126011	0.0883989	-0.169002	0.0952023	0		9.36258	65.6804
773	0.1023	-0.1061		-1.03715	0	0		0.145914	0.708172		0.014927	0.087373	-0.200197	0.0940974	1.40421e-17		11.5386	67.5393
803	0.1048	-0.1404		-1.33969	0	0		0.166796	0.666409		0.0174802	0.0873198	-0.23444	0.0940401	0		14.0366	70.1178
833	0.1081	-0.1774		-1.64107	0	0		0.187597	0.624807		0.0202792	0.0878208	-0.27198	0.0945797	0		16.8926	73.1547
863	0.1119	-0.2157		-1.92761	0	0		0.207373	0.585253		0.0232051	0.0886949	-0.311221	0.0955211	0		20.026	76.5437
893	0.116	-0.2484		-2.14138	0	0		0.222127	0.555745		0.0257668	0.0902332	-0.345578	0.0971778	0		23.0097	80.5783
923	0.1206	-0.2741		-2.2728	0	0		0.231198	0.537604		0.0278825	0.0927175	-0.373953	0.0998533	0		25.7355	85.5783
953	0.1253	-0.2937		-2.34397	0	0		0.23611	0.52778		0.0295846	0.0957154	-0.396782	0.103082	-5.61683e-17		28.1941	91.2168
983	0.1303	-0.3073		-2.3584	0	0		0.237106	0.525788		0.0308949	0.0994051	-0.414356	0.107056	5.61683e-17		30.3697	97.7152
1013	0.1353	-0.3166		-2.33999	0	0		0.235835	0.52833		0.0319085	0.103392	-0.427949	0.111349	0		32.3233	104.736
1043	0.1378	-0.3231		-2.3447	0	0		0.23616	0.527679		0.0325429	0.105257	-0.436458	0.113358	5.61683e-17		33.9423	109.783
1073	0.1385	-0.3267		-2.35884	0	0		0.237137	0.525727		0.0328434	0.105657	-0.440488	0.113788	0		35.241	113.37
1103	0.1387	-0.3253		-2.34535	0	0		0.236205	0.52759		0.0327617	0.105938	-0.439392	0.114092	0		36.1361	116.85
1133	0.1387	-0.3171		-2.28623	0	0		0.232125	0.535751		0.0321957	0.106504	-0.431801	0.114701	5.61683e-17		36.4777	120.669
1163	0.1383	-0.3043		-2.20029	0	0		0.226193	0.547614		0.0312825	0.107017	-0.419554	0.115254	0		36.3816	124.461
1193	0.1369	-0.2887		-2.10884	0	0		0.219881	0.560237		0.0301018	0.106798	-0.403718	0.115018	1.12337e-16		35.9114	127.41
1223	0.1344	-0.2734		-2.03423	0	0		0.214732	0.570537		0.0288599	0.10554	-0.387063	0.113663	0		35.2957	129.075
1253	0.1311	-0.2602		-1.98474	0	0		0.211316	0.577367		0.0277036	0.103396	-0.371554	0.111354	0		34.7126	129.556
1283	0.1274	-0.2477		-1.94427	0	0		0.208523	0.582954		0.0265658	0.100834	-0.356295	0.108595	2.80842e-17		34.084	129.37
1313	0.1235	-0.2346		-1.8996	0	0		0.20544	0.589121		0.0253718	0.0981282	-0.34028	0.10568	2.80842e-17		33.3132	128.842
1343	0.1188	-0.2219		-1.86785	0	0		0.203248	0.593504		0.0241459	0.0946541	-0.323839	0.101939	2.80842e-17		32.4279	127.12
1373	0.1135	-0.21		-1.85022	0	0		0.202032	0.595937		0.0229306	0.0905694	-0.30754	0.0975398	0		31.4837	124.352
1403	0.1076	-0.1988		-1.84758	0	0		0.20185	0.5963		0.021719	0.085881	-0.291291	0.0924906	2.80842e-17		30.4718	120.491
1433	0.1014	-0.1901		-1.87475	0	0		0.203725	0.59255		0.0206577	0.0807423	-0.277056	0.0869564	5.61683e-17		29.6025	115.704
1463	0.0951	-0.1835		-1.92955	0	0		0.207507	0.584986		0.0197339	0.0753661	-0.264666	0.0811664	5.61683e-17		28.8707	110.261
1493	0.0884	-0.1789		-2.02376	0	0		0.214009	0.571982		0.0189184	0.0694816	-0.253729	0.0748291	0		28.2452	103.736
1523	0.0815	-0.176		-2.15951	0	0		0.223379	0.553243		0.0182054	0.0632946	-0.244166	0.0681659	0		27.7268	96.3977
1553	0.0743	-0.1751		-2.35666	0	0		0.236986	0.526028		0.0176081	0.0566919	-0.236155	0.0610551	0		27.3453	88.0426
1583	0.0674	-0.1764		-2.61721	0	0		0.254969	0.490062		0.0171849	0.0502151	-0.23048	0.0540798	0		27.2037	79.4905
1613	0.0613	-0.1796		-2.92985	0	0		0.276547	0.446906		0.0169523	0.0443477	-0.227361	0.0477608	0		27.3441	71.5328
1643	0.0554	-0.1846		-3.33213	0	0		0.304312	0.391376		0.0168589	0.0385411	-0.226107	0.0415073	0		27.6991	63.3231
1673	0.0506	-0.1919		-3.79249	0	0		0.336086	0.327829		0.0170059	0.0335941	-0.22808	0.0361795	2.80842e-17		28.4509	56.2029
1703	0.0474	-0.2017		-4.25527	0	0		0.368027	0.263947		0.0174445	0.0299555	-0.233961	0.032261	2.80842e-17		29.7079	51.0143
1733	0.0452	-0.2144		-4.74336	0	0		0.401714	0.196572		0.0181575	0.0270425	-0.243524	0.0291238	-2.80842e-17		31.4669	46.8647
1763	0.0431	-0.2317		-5.37587	0	0		0.445369	0.109262		0.0191954	0.0239046	-0.257444	0.0257443	2.80842e-17		33.8415	42.1438
1793	0.0411	-0.2534		-6.16545	0	0		0.499865	0.000269325		0.0205445	0.0205555	-0.275538	0.0221375	0		36.8362	36.8561
1823	0.04	-0.276		-6.9	0	0		0.550563	-0.101127		0.0220225	0.0179775	-0.295361	0.0193611	0		40.1471	32.7729
1853	0.0398	-0.3015		-7.57538	0	0		0.597177	-0.194355		0.0237677	0.0160323	-0.318766	0.0172662	5.61683e-17		44.0415	29.7079
1883	0.0405	-0.3309		-8.17037	0	0		0.638243	-0.276487		0.0258489	0.0146511	-0.346679	0.0157787	1.12337e-16		48.6734	27.5881
1913	0.0414	-0.3608		-8.71498	0	0		0.675832	-0.351663		0.0279794	0.0134206	-0.375253	0.0144535	1.12337e-16		53.5246	25.6736
1943	0.0425	-0.3948		-9.28941	0	0		0.715479	-0.430957		0.0304078	0.0120922	-0.407823	0.0130228	1.12337e-16		59.0824	23.4951
1973	0.0435	-0.4355		-10.0115	0	0		0.765316	-0.530632		0.0332913	0.0102087	-0.446494	0.0109944	0		65.6836	20.1419
2003	0.0445	-0.479		-10.764	1	-10.764		0.817257	-0.634513		0.0363679	0.00813208	-0.487758	0.00875795	-1.12337e-16		72.8449	16.2886
2033	0.0456	-0.5223		-11.4539	1	-11.4539		0.864873	-0.729746		0.0394382	0.00616179	-0.528936	0.00663601	1.12337e-16		80.1779	12.5269
2063	0.0466	-0.5652		-12.1288	1	-12.1288		0.911448	-0.822896		0.0424735	0.00412653	-0.569644	0.00444412	0		87.6228	8.51304
2093	0.0478	-0.6055		-12.6674	1	-12.6674		0.948622	-0.897244		0.0453441	0.00245586	-0.608145	0.00264487	0		94.9053	5.14012
2123	0.0492	-0.6422		-13.0528	1	-13.0528		0.975228	-0.950455		0.0479812	0.0012188	-0.643513	0.0013126	0		101.864	2.58751
2153	0.051	-0.676		-13.2549	1	-13.2549		0.989173	-0.978347		0.0504478	0.000552153	-0.676595	0.000594648	0		108.614	1.18879
2183	0.0529	-0.7049		-13.3251	1	-13.3251		0.994021	-0.988043		0.0525837	0.00031627	-0.705241	0.000340611	1.12337e-16		114.79	0.690418
2213	0.0546	-0.7281		-13.3352	1	-13.3352		0.994713	-0.989426		0.0543113	0.000288663	-0.728411	0.000310879	0		120.191	0.63881
2243	0.0559	-0.7462		-13.3488	1	-13.3488		0.995657	-0.991314		0.0556572	0.000242785	-0.746461	0.00026147	0		124.839	0.544567
2273	0.0567	-0.7588		-13.3827	1	-13.3827		0.997995	-0.99599		0.0565863	0.000113679	-0.758922	0.000122428	0		128.621	0.258392
2303	0.0573	-0.7681		-13.4049	1	-13.4049		0.999525	-0.999051		0.0572728	2.72017e-05	-0.768129	2.92952e-05	0		131.899	0.0626455
2333	0.0578	-0.7752		-13.4118	1	-13.4118		1	-1		0.0578	0	-0.7752	0	0		134.847	0
2363	0.0583	-0.7787		-13.3568	1	-13.3568		0.996205	-0.992409		0.0580787	0.000221267	-0.778938	0.000238297	0		137.24	0.522855
2393	0.0589	-0.777		-13.1919	1	-13.1919		0.984822	-0.969643		0.058006	0.000894001	-0.777963	0.000962806	-1.12337e-16		138.808	2.13935
2423	0.0593	-0.7712		-13.0051	1	-13.0051		0.97193	-0.943859		0.0576354	0.00166458	-0.772993	0.00179269	0		139.651	4.03328
2453	0.0596	-0.7625		-12.7936	1	-12.7936		0.957336	-0.914673		0.0570573	0.00254275	-0.765238	0.00273844	0		139.961	6.23736
2483	0.0593	-0.7508		-12.661	1	-12.661		0.948186	-0.896372		0.0562274	0.00307257	-0.754109	0.00330904	1.12337e-16		139.613	7.62919
2513	0.0586	-0.7364		-12.5666	1	-12.5666		0.941664	-0.883328		0.0551815	0.00341848	-0.740082	0.00368157	1.12337e-16		138.671	8.59064
2543	0.0578	-0.7194		-12.4464	1	-12.4464		0.933369	-0.866738		0.0539487	0.00385127	-0.723548	0.00414767	0		137.192	9.79378
2573	0.0567	-0.6986		-12.321	1	-12.321		0.924715	-0.849431		0.0524314	0.00426863	-0.703197	0.00459716	1.12337e-16		134.906	10.9832
2603	0.0554	-0.6713		-12.1173	1	-12.1173		0.910659	-0.821318		0.0504505	0.00494949	-0.67663	0.00533041	-1.12337e-16		131.323	12.8835
2633	0.0538	-0.6367		-11.8346	1	-11.8346		0.891143	-0.782287		0.0479435	0.00585648	-0.643007	0.00630721	1.12337e-16		126.235	15.4201
2663	0.0519	-0.5959		-11.4817	1	-11.4817		0.866788	-0.733576		0.0449863	0.00691369	-0.603346	0.00744578	1.12337e-16		119.799	18.4112
2693	0.0498	-0.5515		-11.0743	1	-11.0743		0.83867	-0.67734		0.0417658	0.00803424	-0.560153	0.00865257	0		112.475	21.6362
2723	0.0471	-0.5078		-10.7813	1	-10.7813		0.818449	-0.636897		0.0385489	0.00855107	-0.517009	0.00920918	0		104.969	23.2846
2753	0.0442	-0.4692		-10.6154	1	-10.6154		0.806996	-0.613992		0.0356692	0.00853077	-0.478387	0.00918732	-5.61683e-17		98.1974	23.4852
2783	0.0417	-0.4337		-10.4005	0	0		0.792164	-0.584327		0.0330332	0.00866678	-0.443034	0.00933379	1.12337e-16		91.9315	24.1196
2813	0.0395	-0.3982		-10.081	0	0		0.770114	-0.540228		0.0304195	0.00908049	-0.407979	0.00977934	0		85.5701	25.5434
2843	0.037	-0.3594		-9.71351	0	0		0.74475	-0.489499		0.0275557	0.00944426	-0.369571	0.0101711	5.61683e-17		78.341	26.85
2873	0.0345	-0.3192		-9.25217	0	0		0.712908	-0.425817		0.0245953	0.00990466	-0.329867	0.0106669	0		70.6624	28.4561
2903	0.0321	-0.2826		-8.80374	0	0		0.681958	-0.363916		0.0218908	0.0102092	-0.293595	0.0109949	5.61683e-17		63.5491	29.6372
2933	0.0297	-0.2512		-8.45791	0	0		0.658089	-0.316178		0.0195452	0.0101548	-0.262136	0.0109363	5.61683e-17		57.3262	29.7839
2963	0.0277	-0.2219		-8.01083	0	0		0.627232	-0.254464		0.0173743	0.0103257	-0.23302	0.0111204	2.80842e-17		51.4801	30.595
2993	0.026	-0.1999		-7.68846	0	0		0.604982	-0.209965		0.0157295	0.0102705	-0.210961	0.0110609	2.80842e-17		47.0785	30.7395
3023	0.0248	-0.1863		-7.5121	0	0		0.59281	-0.18562		0.0147017	0.0100983	-0.197176	0.0108755	5.61683e-17		44.4432	30.5272
3053	0.0237	-0.1729		-7.29536	0	0		0.577851	-0.155701		0.0136951	0.0100049	-0.183675	0.0107749	2.80842e-17		41.811	30.5451
3083	0.0228	-0.1616		-7.08772	0	0		0.56352	-0.127039		0.0128482	0.00995175	-0.172318	0.0107177	0		39.6111	30.6813
3113	0.0219	-0.1525		-6.96347	0	0		0.554944	-0.109888		0.0121533	0.00974673	-0.162997	0.0104969	-2.80842e-17		37.8331	30.3416
3143	0.021	-0.1426		-6.79048	0	0		0.543004	-0.0860082		0.0114031	0.00959691	-0.152936	0.0103355	0		35.8399	30.1631
3173	0.0204	-0.1323		-6.48529	0	0		0.521941	-0.0438814		0.0106476	0.00975241	-0.142803	0.010503	2.80842e-17		33.7848	30.9444
3203	0.0201	-0.1237		-6.15423	0	0		0.499091	0.00181829		0.0100317	0.0100683	-0.134543	0.0108432	2.80842e-17		32.1316	32.2487
3233	0.0201	-0.1167		-5.80597	0	0		0.475054	0.0498913		0.00954859	0.0105514	-0.128063	0.0113635	0		30.8706	34.1127
3263	0.0203	-0.1111		-5.47291	0	0		0.452067	0.0958669		0.00917695	0.011123	-0.123079	0.0119791	0		29.9444	36.2945
3293	0.0204	-0.1067		-5.23039	0	0		0.435328	0.129343		0.0088807	0.0115193	-0.119106	0.0124059	1.40421e-17		29.2441	37.9331
3323	0.0206	-0.1026		-4.98058	0	0		0.418087	0.163826		0.00861259	0.0119874	-0.11551	0.01291	2.80842e-17		28.6196	39.8342
3353	0.0207	-0.0986		-4.76329	0	0		0.403089	0.193822		0.00834394	0.0123561	-0.111907	0.013307	0		27.9772	41.4299
3383	0.0211	-0.0939		-4.45024	0	0		0.381483	0.237035		0.00804929	0.0130507	-0.107955	0.0140551	-1.40421e-17		27.2307	44.1506
3413	0.0216	-0.0883		-4.08796	0	0		0.356479	0.287042		0.00769994	0.0139001	-0.10327	0.0149698	1.40421e-17		26.2799	47.4409
3443	0.0223	-0.0821		-3.68161	0	0		0.328433	0.343134		0.00732406	0.0149759	-0.0982285	0.0161285	0		25.2167	51.5622
3473	0.0234	-0.0751		-3.2094	0	0		0.295841	0.408317		0.00692269	0.0164773	-0.0928454	0.0177454	1.40421e-17		24.0425	57.2257
3503	0.0244	-0.0689		-2.82377	0	0		0.269225	0.461549		0.0065691	0.0178309	-0.0881032	0.0192032	-1.40421e-17		23.0116	62.4616
3533	0.0255	-0.0645		-2.52941	0	0		0.248909	0.502182		0.00634718	0.0191528	-0.0851269	0.0206269	0		22.4246	67.6669
3563	0.0265	-0.0618		-2.33208	0	0		0.235289	0.529422		0.00623516	0.0202648	-0.0836245	0.0218245	7.02104e-18		22.2159	72.2036
3593	0.0275	-0.0599		-2.17818	0	0		0.224667	0.550665		0.00617835	0.0213216	-0.0828626	0.0229626	1.40421e-17		22.1988	76.6087
3623	0.0288	-0.0582		-2.02083	0	0		0.213807	0.572385		0.00615765	0.0226423	-0.082585	0.024385	0		22.3092	82.0332
3653	0.03	-0.0566		-1.88667	0	0		0.204547	0.590906		0.00613642	0.0238636	-0.0823002	0.0257002	1.40421e-17		22.4163	87.1737
3683	0.0312	-0.0549		-1.75962	0	0		0.195778	0.608443		0.00610828	0.0250917	-0.0819228	0.0270228	7.02104e-18		22.4968	92.4128
3713	0.032	-0.053		-1.65625	0	0		0.188644	0.622712		0.00603661	0.0259634	-0.0809616	0.0279616	7.02104e-18		22.4139	96.4021
3743	0.0326	-0.0504		-1.54601	0	0		0.181036	0.637929		0.00590176	0.0266982	-0.079153	0.028753	1.40421e-17		22.0903	99.9315
3773	0.033	-0.0464		-1.40606	0	0		0.171376	0.657248		0.00565541	0.0273446	-0.0758491	0.0294491	7.02104e-18		21.3379	103.171
3803	0.0333	-0.0411		-1.23423	0	0		0.159517	0.680966		0.00531191	0.0279881	-0.0712421	0.0301421	1.40421e-17		20.2012	106.439
3833	0.0337	-0.0348		-1.03264	0	0		0.145603	0.708794		0.00490682	0.0287932	-0.0658092	0.0310092	2.80842e-17		18.8079	110.364
3863	0.034	-0.0284		-0.835294	0	0		0.131982	0.736035		0.0044874	0.0295126	-0.060184	0.031784	0		17.3348	114.007
3893	0.0343	-0.0231		-0.673469	0	0		0.120813	0.758373		0.0041439	0.0301561	-0.055577	0.032477	3.51052e-18		16.1322	117.398
3923	0.0343	-0.0192		-0.559767	0	0		0.112966	0.774069		0.00387472	0.0304253	-0.0519669	0.0327669	1.05316e-17		15.2005	119.358
3953	0.0339	-0.0166		-0.489676	0	0		0.108128	0.783744		0.00366554	0.0302345	-0.0491614	0.0325614	3.51052e-18		14.4899	119.517
3983	0.0333	-0.0148		-0.444444	0	0		0.105006	0.789988		0.00349671	0.0298033	-0.046897	0.032097	-7.02104e-18		13.9274	118.707
4013	0.0326	-0.0132		-0.404908	0	0		0.102277	0.795445		0.00333425	0.0292658	-0.0447181	0.0315181	-3.51052e-18		13.3803	117.443
4043	0.032	-0.0116		-0.3625	0	0		0.0993505	0.801299		0.00317922	0.0288208	-0.0426389	0.0310389	-3.51052e-18		12.8536	116.522
4073	0.0312	-0.01		-0.320513	0	0		0.0964526	0.807095		0.00300932	0.0281907	-0.0403603	0.0303603	5.26578e-18		12.257	114.821
4103	0.0303	-0.0086		-0.283828	0	0		0.0939207	0.812159		0.0028458	0.0274542	-0.0381671	0.0295671	3.51052e-18		11.6763	112.645
4133	0.0292	-0.0075		-0.256849	0	0		0.0920586	0.815883		0.00268811	0.0265119	-0.0360523	0.0285523	0		11.11	109.574
4163	0.0279	-0.0075		-0.268817	0	0		0.0928846	0.814231		0.00259148	0.0253085	-0.0347563	0.0272563	3.51052e-18		10.7883	105.359
4193	0.0266	-0.0083		-0.31203	0	0		0.0958671	0.808266		0.00255007	0.0240499	-0.0342009	0.0259009	5.26578e-18		10.6924	100.841
4223	0.0253	-0.0093		-0.367589	0	0		0.0997017	0.800597		0.00252245	0.0227775	-0.0338306	0.0245306	-3.51052e-18		10.6523	96.1896
4253	0.0242	-0.0103		-0.42562	0	0		0.103707	0.792586		0.00250971	0.0216903	-0.0336596	0.0233596	3.51052e-18		10.6738	92.2488
4283	0.023	-0.0115		-0.5	0	0		0.108841	0.782319		0.00250333	0.0204967	-0.0335741	0.0220741	0		10.7218	87.7872
4313	0.0212	-0.0128		-0.603774	0	0		0.116003	0.767994		0.00245926	0.0187407	-0.0329831	0.0201831	1.22868e-17		10.6068	80.8288
4343	0.0189	-0.0145		-0.767196	0	0		0.127282	0.745435		0.00240563	0.0164944	-0.0322638	0.0177638	-1.75526e-18		10.4477	71.635
4373	0.0174	-0.0165		-0.948276	0	0		0.13978	0.720439		0.00243218	0.0149678	-0.0326198	0.0161198	3.51052e-18		10.6359	65.4543

## Sheet: Chl-a ether
Spreadsheet to evaluate maximum-possible fraction of Qx absorption and Qx-Qy gap by analytical inversion of MCD and ABS data
Source: Reimers, Cai, Kobyashi, Rätsep, Freiberg and Krausz
Enter the observed data in the blue fields incolumns A,B,C as frequency, Absorption/frequency, and MCD Delta Absorption / frequency. Assumes equally spaced in frequency (else replace all sums by integrals)
NOTE: this analysis will only work well if the data has little noise, the band tails are included, there are no interfering transitions, there is only 1 species present (eg no aggregation) and the base line is accurate.
Enter the Magnetic field strength and other factors needed to express B/D in physical units in cell D17
Data filtering parameters entered in cells M12 and O12 eliminates noise due to weak signals; a small relative error in the data inversion usually results because of this
A valid soution is obtained for any rescaling ³1 of the initial Bx/Dx beyond the value that gives maximal Dx absorption, enter a rescaling in cell M13
Yellow boxes contain intermediate and final outupts
																approx Qx-Qy unperturbed gap: Ex-Ey+lx-ly=
SUM:	21.8868	-8.397			Data Filter: Include in max/min test if relative MCD signal >							0.6	rel abs >	0.03
MAX:	0.9776	1.0066			Bx/Dx from min value gives max possible Dx, rescale by (³ 1)							1						1536.13
MIN:	0.0116	-0.6247				Bx/Dx= min value			-9.68643	rescalled	-9.68643	in T^-1 =	-0.00508537			Ave E=	1828.2	292.074
						By/Dy= max value			1.08073			in T^-1 =	0.000567384
Chl-a ether						fraction Qx abs =Dx/(Dx+Dy)=			0.136005		ratio -Bx/By=		1.41088
B/D scaling to units of Tesla^-1			0.000525
Experimental Data:				DA/A				Polarization			Partitioned ABS and MCD						Ave abs energy
n	A/n	DA/n		Raw	Filter	Filtered		fr. X	LD		Ax/n	Ay/n	DAx/n	DAy/n	Rel error		Ax	Ay
-680	0.0116	0.0228		1.96552	0	0		0	1		0	0.0116	0	0.0125365	-0.0101962		0	-7.888
-650	0.0145	0.0266		1.83448	0	0		0	1		0	0.0145	0	0.0156706	-0.0108577		0	-9.425
-620	0.0188	0.0315		1.67553	0	0		0	1		0	0.0188	0	0.0203178	-0.0111089		0	-11.656
-590	0.0238	0.0364		1.52941	0	0		0	1		0	0.0238	0	0.0257214	-0.0106086		0	-14.042
-560	0.0307	0.043		1.40065	0	0		0	1		0	0.0307	0	0.0331785	-0.00975714		0	-17.192
-530	0.0407	0.0529		1.29975	0	0		0	1		0	0.0407	0	0.0439858	-0.00885578		0	-21.571
-500	0.0555	0.0662		1.19279	0	0		0	1		0	0.0555	0	0.0599806	-0.00617862		0	-27.75
-470	0.0774	0.0846		1.09302	0	0		0	1		0	0.0774	0	0.0836486	-0.00094514		0	-36.378
-440	0.1088	0.1115		1.02482	0	0		0.00519314	0.989614		0.000565014	0.108235	-0.00547296	0.116973	0		-0.248606	-47.6234
-410	0.1528	0.1501		0.98233	0	0		0.00913906	0.981722		0.00139645	0.151404	-0.0135266	0.163627	-2.75736e-17		-0.572544	-62.0755
-380	0.2108	0.2048		0.971537	0	0		0.0101414	0.979717		0.00213782	0.208662	-0.0207078	0.225508	2.75736e-17		-0.81237	-79.2916
-350	0.2831	0.2795		0.987284	0	0		0.00867897	0.982642		0.00245702	0.280643	-0.0237997	0.3033	-5.51472e-17		-0.859956	-98.225
-320	0.3659	0.3731		1.01968	0	0		0.00567039	0.988659		0.0020748	0.363825	-0.0200974	0.393197	0		-0.663935	-116.424
-290	0.4576	0.4802		1.04939	0	0		0.00291102	0.994178		0.00133208	0.456268	-0.0129031	0.493103	-5.51472e-17		-0.386304	-132.318
-260	0.5592	0.5973		1.06813	0	0		0.00117009	0.99766		0.000654312	0.558546	-0.00633795	0.603638	1.10294e-16		-0.170121	-145.222
-230	0.6644	0.7176		1.08007	1	1.08007		6.12327e-05	0.999878		4.0683e-05	0.664359	-0.000394073	0.717994	0		-0.00935709	-152.803
-200	0.7655	0.8273		1.08073	1	1.08073		0	1		0	0.7655	0	0.8273	0		0	-153.1
-170	0.8565	0.9142		1.06737	1	1.06737		0.00124121	0.997518		0.0010631	0.855437	-0.0102976	0.924498	0		-0.180727	-145.424
-140	0.9272	0.9739		1.05037	1	1.05037		0.00282014	0.99436		0.00261483	0.924585	-0.0253284	0.999228	-1.10294e-16		-0.366076	-129.442
-110	0.9687	1.0053		1.03778	1	1.03778		0.00398888	0.992022		0.00386403	0.964836	-0.0374287	1.04273	-2.20589e-16		-0.425044	-106.132
-80	0.9776	1.0066		1.02966	1	1.02966		0.00474285	0.990514		0.00463661	0.972963	-0.0449122	1.05151	0		-0.370929	-77.8371
-50	0.9539	0.9759		1.02306	1	1.02306		0.00535595	0.989288		0.00510904	0.948791	-0.0494883	1.02539	0		-0.255452	-47.4395
-20	0.8994	0.9142		1.01646	1	1.01646		0.00596965	0.988061		0.0053691	0.894031	-0.0520074	0.966207	0		-0.107382	-17.8806
10	0.821	0.8299		1.01084	1	1.01084		0.00649114	0.987018		0.00532922	0.815671	-0.0516211	0.881521	1.10294e-16		0.0532922	8.15671
40	0.7294	0.7349		1.00754	1	1.00754		0.00679762	0.986405		0.00495819	0.724442	-0.0480271	0.782927	0		0.198327	28.9777
70	0.6364	0.6358		0.999057	1	0.999057		0.00758551	0.984829		0.00482742	0.631573	-0.0467604	0.68256	0		0.337919	44.2101
100	0.5497	0.5365		0.975987	0	0		0.00972816	0.980544		0.00534757	0.544352	-0.0517988	0.588299	-1.10294e-16		0.534757	54.4352
130	0.4683	0.4427		0.945334	0	0		0.012575	0.97485		0.00588889	0.462411	-0.0570423	0.499742	0		0.765555	60.1134
160	0.3934	0.36		0.915099	0	0		0.0153831	0.969234		0.00605172	0.387348	-0.0586195	0.41862	-5.51472e-17		0.968275	61.9757
190	0.3307	0.2932		0.886604	0	0		0.0180296	0.963941		0.00596238	0.324738	-0.0577542	0.350954	0		1.13285	61.7001
220	0.2813	0.2433		0.864913	0	0		0.0200442	0.959912		0.00563842	0.275662	-0.0546162	0.297916	0		1.24045	60.6455
250	0.2413	0.2061		0.854123	0	0		0.0210462	0.957908		0.00507845	0.236222	-0.0491921	0.255292	2.75736e-17		1.26961	59.0554
280	0.2067	0.1757		0.850024	0	0		0.0214269	0.957146		0.00442895	0.202271	-0.0429007	0.218601	0		1.24011	56.6359
310	0.1763	0.1489		0.844583	0	0		0.0219323	0.956135		0.00386666	0.172433	-0.0374541	0.186354	0		1.19867	53.4543
340	0.1504	0.1252		0.832447	0	0		0.0230594	0.953881		0.00346814	0.146932	-0.0335939	0.158794	0		1.17917	49.9568
370	0.1302	0.1056		0.81106	0	0		0.0250458	0.949908		0.00326096	0.126939	-0.031587	0.137187	2.75736e-17		1.20655	46.9674
400	0.1156	0.0889		0.769031	0	0		0.0289492	0.942102		0.00334653	0.112253	-0.0324159	0.121316	0		1.33861	44.9014
430	0.1053	0.0745		0.707502	0	0		0.0346637	0.930673		0.00365008	0.10165	-0.0353563	0.109856	1.37868e-17		1.56954	43.7095
460	0.0982	0.0616		0.627291	0	0		0.0421133	0.915773		0.00413552	0.0940645	-0.0400584	0.101658	0		1.90234	43.2697
490	0.0934	0.0486		0.520343	0	0		0.0520461	0.895908		0.00486111	0.0885389	-0.0470868	0.0956868	6.8934e-18		2.38194	43.3841
520	0.0904	0.0346		0.382743	0	0		0.0648257	0.870349		0.00586024	0.0845398	-0.0567648	0.0913648	0		3.04732	43.9607
550	0.0887	0.0183		0.206313	0	0		0.0812116	0.837577		0.00720347	0.0814965	-0.0697759	0.0880759	1.03401e-17		3.96191	44.8231
580	0.0883	-0.0015		-0.0169875	0	0		0.101951	0.796099		0.00900224	0.0792978	-0.0871996	0.0856996	-1.29251e-18		5.2213	45.9927
610	0.0887	-0.0252		-0.284104	0	0		0.126759	0.746482		0.0112435	0.0774565	-0.10891	0.0837096	0		6.85855	47.2484
640	0.0896	-0.0527		-0.58817	0	0		0.154999	0.690002		0.0138879	0.0757121	-0.134524	0.0818244	-1.37868e-17		8.88827	48.4557
670	0.0911	-0.0839		-0.920966	0	0		0.185908	0.628185		0.0169362	0.0741638	-0.164051	0.0801512	-1.37868e-17		11.3472	49.6898
700	0.0936	-0.1171		-1.25107	0	0		0.216566	0.566868		0.0202706	0.0733294	-0.196349	0.0792494	2.75736e-17		14.1894	51.3306
730	0.0972	-0.1512		-1.55556	0	0		0.244845	0.51031		0.023799	0.073401	-0.230527	0.0793268	0		17.3732	53.5828
760	0.102	-0.1851		-1.81471	0	0		0.268914	0.462172		0.0274292	0.0745708	-0.265691	0.080591	0		20.8462	56.6738
790	0.1081	-0.2176		-2.01295	0	0		0.287326	0.425348		0.0310599	0.0770401	-0.30086	0.0832596	2.75736e-17		24.5373	60.8617
820	0.1146	-0.2484		-2.16754	0	0		0.301683	0.396634		0.0345729	0.0800271	-0.334888	0.0864878	0		28.3498	65.6222
850	0.1207	-0.2767		-2.29246	0	0		0.313285	0.373429		0.0378135	0.0828865	-0.366278	0.089578	5.51472e-17		32.1415	70.4535
880	0.1261	-0.2985		-2.36717	0	0		0.320224	0.359552		0.0403802	0.0857198	-0.39114	0.0926401	5.51472e-17		35.5346	75.4334
910	0.1305	-0.3121		-2.39157	0	0		0.32249	0.35502		0.042085	0.088415	-0.407653	0.0955529	0		38.2973	80.4577
940	0.1334	-0.3181		-2.38456	0	0		0.321839	0.356322		0.0429333	0.0904667	-0.41587	0.0977702	5.51472e-17		40.3573	85.0387
970	0.1351	-0.3155		-2.33531	0	0		0.317265	0.365471		0.0428625	0.0922375	-0.415184	0.099684	5.51472e-17		41.5766	89.4704
1000	0.1361	-0.3061		-2.24908	0	0		0.309256	0.381487		0.0420898	0.0940102	-0.4077	0.1016	-1.10294e-16		42.0898	94.0102
1030	0.1366	-0.2929		-2.14422	0	0		0.299517	0.400966		0.040914	0.095686	-0.396311	0.103411	5.51472e-17		42.1415	98.5565
1060	0.1368	-0.2748		-2.00877	0	0		0.286938	0.426125		0.0392531	0.0975469	-0.380222	0.105422	5.51472e-17		41.6083	103.4
1090	0.1361	-0.2518		-1.85011	0	0		0.272202	0.455596		0.0370467	0.0990533	-0.35885	0.10705	-5.51472e-17		40.3809	107.968
1120	0.1347	-0.2252		-1.67186	0	0		0.255647	0.488705		0.0344357	0.100264	-0.333559	0.108359	5.51472e-17		38.568	112.296
1150	0.1331	-0.1983		-1.48986	0	0		0.238743	0.522513		0.0317768	0.101323	-0.307803	0.109503	-2.75736e-17		36.5433	116.522
1180	0.1311	-0.1763		-1.34477	0	0		0.225269	0.549462		0.0295328	0.101567	-0.286067	0.109767	-2.75736e-17		34.8487	119.849
1210	0.1282	-0.1604		-1.25117	0	0		0.216575	0.566849		0.027765	0.100435	-0.268943	0.108543	-2.75736e-17		33.5956	121.526
1240	0.1244	-0.1491		-1.19855	0	0		0.211689	0.576623		0.0263341	0.0980659	-0.255083	0.105983	5.51472e-17		32.6542	121.602
1270	0.1199	-0.14		-1.16764	0	0		0.208818	0.582365		0.0250372	0.0948628	-0.242521	0.102521	0		31.7973	120.476
1300	0.1147	-0.1325		-1.15519	0	0		0.207661	0.584678		0.0238187	0.0908813	-0.230718	0.0982183	0		30.9643	118.146
1330	0.1089	-0.127		-1.16621	0	0		0.208684	0.582631		0.0227257	0.0861743	-0.220131	0.0931312	0		30.2252	114.612
1360	0.1028	-0.1231		-1.19747	0	0		0.211588	0.576824		0.0217513	0.0810487	-0.210692	0.0875919	1.37868e-17		29.5817	110.226
1390	0.0967	-0.1196		-1.23681	0	0		0.215242	0.569516		0.0208139	0.0758861	-0.201612	0.0820125	0		28.9313	105.482
1420	0.0907	-0.1163		-1.28225	0	0		0.219462	0.561076		0.0199052	0.0707948	-0.19281	0.0765102	1.37868e-17		28.2654	100.529
1450	0.0847	-0.1142		-1.34829	0	0		0.225595	0.54881		0.0191079	0.0655921	-0.185087	0.0708874	-2.75736e-17		27.7065	95.1085
1480	0.0784	-0.1153		-1.47066	0	0		0.236961	0.526078		0.0185777	0.0598223	-0.179952	0.0646518	2.75736e-17		27.495	88.537
1510	0.0718	-0.1206		-1.67967	0	0		0.256372	0.487256		0.0184075	0.0533925	-0.178303	0.057703	4.13604e-17		27.7953	80.6227
1540	0.0656	-0.1298		-1.97866	0	0		0.284141	0.431718		0.0186396	0.0469604	-0.180552	0.0507515	0		28.705	72.319
1570	0.0602	-0.1421		-2.36047	0	0		0.319601	0.360798		0.01924	0.04096	-0.186367	0.0442668	0		30.2068	64.3072
1600	0.0558	-0.1585		-2.8405	0	0		0.364185	0.271631		0.0203215	0.0354785	-0.196843	0.0383427	-2.75736e-17		32.5144	56.7656
1630	0.0528	-0.1794		-3.39773	0	0		0.415937	0.168126		0.0219615	0.0308385	-0.212728	0.0333282	5.51472e-17		35.7972	50.2668
1660	0.0507	-0.2039		-4.0217	0	0		0.473888	0.0522239		0.0240261	0.0266739	-0.232727	0.0288273	0		39.8834	44.2786
1690	0.0489	-0.2317		-4.73824	0	0		0.540437	-0.0808743		0.0264274	0.0224726	-0.255987	0.0242869	-2.75736e-17		44.6623	37.9787
1720	0.048	-0.2626		-5.47083	0	0		0.608477	-0.216953		0.0292069	0.0187931	-0.28291	0.0203103	0		50.2358	32.3242
1750	0.0482	-0.2969		-6.15975	0	0		0.67246	-0.34492		0.0324126	0.0157874	-0.313962	0.017062	0		56.722	27.628
1780	0.0491	-0.3345		-6.81263	0	0		0.733096	-0.466192		0.035995	0.013105	-0.348663	0.014163	-5.51472e-17		64.0711	23.3269
1810	0.0505	-0.3733		-7.39208	0	0		0.786912	-0.573825		0.0397391	0.0107609	-0.38493	0.0116297	0		71.9277	19.4773
1840	0.0521	-0.4118		-7.90403	1	-7.90403		0.83446	-0.66892		0.0434754	0.00862464	-0.421121	0.00932092	5.51472e-17		79.9947	15.8693
1870	0.0538	-0.4503		-8.36989	1	-8.36989		0.877726	-0.755453		0.0472217	0.00657832	-0.457409	0.0071094	0		88.3045	12.3015
1900	0.0555	-0.4895		-8.81982	1	-8.81982		0.919514	-0.839028		0.051033	0.00446698	-0.494328	0.00482761	0		96.9627	8.48727
1930	0.0578	-0.529		-9.15225	1	-9.15225		0.950388	-0.900776		0.0549324	0.00286756	-0.532099	0.00309907	0		106.02	5.5344
1960	0.0602	-0.5652		-9.3887	1	-9.3887		0.972349	-0.944698		0.0585354	0.00166459	-0.566999	0.00179898	1.10294e-16		114.729	3.2626
1990	0.0619	-0.5928		-9.57674	1	-9.57674		0.989812	-0.979625		0.0612694	0.000630608	-0.593482	0.000681518	0		121.926	1.25491
2020	0.0632	-0.6108		-9.66456	1	-9.66456		0.997969	-0.995938		0.0630716	0.000128373	-0.610939	0.000138737	-1.10294e-16		127.405	0.259314
2050	0.0641	-0.6209		-9.68643	1	-9.68643		1	-1		0.0641	0	-0.6209	0	0		131.405	0
2080	0.0648	-0.6247		-9.64043	1	-9.64043		0.995728	-0.991456		0.0645232	0.000276814	-0.624999	0.000299162	-1.10294e-16		134.208	0.575773
2110	0.0653	-0.6224		-9.53139	1	-9.53139		0.985601	-0.971202		0.0643598	0.00094024	-0.623416	0.00101615	0		135.799	1.98391
2140	0.0656	-0.6136		-9.35366	1	-9.35366		0.969094	-0.938188		0.0635726	0.00202743	-0.615791	0.00219111	0		136.045	4.3387
2170	0.0654	-0.5993		-9.16361	1	-9.16361		0.951443	-0.902886		0.0622244	0.00317562	-0.602732	0.00343199	0		135.027	6.89109
2200	0.0648	-0.5805		-8.95833	1	-8.95833		0.932378	-0.864757		0.0604181	0.00438189	-0.585236	0.00473565	0		132.92	9.64016
2230	0.0639	-0.5581		-8.73396	1	-8.73396		0.91154	-0.823079		0.0582474	0.00565263	-0.564209	0.00610897	0		129.892	12.6054
2260	0.0631	-0.5332		-8.45008	1	-8.45008		0.885174	-0.770348		0.0558545	0.00724551	-0.54103	0.00783045	0		126.231	16.3749
2290	0.0619	-0.507		-8.19063	1	-8.19063		0.861078	-0.722156		0.0533007	0.00859928	-0.516294	0.00929352	0		122.059	19.6924
2320	0.0602	-0.4808		-7.98671	1	-7.98671		0.842139	-0.684278		0.0506968	0.00950324	-0.49107	0.0102705	5.51472e-17		117.616	22.0475
2350	0.0586	-0.4552		-7.76792	1	-7.76792		0.821818	-0.643637		0.0481586	0.0104414	-0.466484	0.0112844	5.51472e-17		113.173	24.5374
2380	0.0571	-0.431		-7.54816	1	-7.54816		0.801408	-0.602817		0.0457604	0.0113396	-0.443255	0.012255	-5.51472e-17		108.91	26.9882
2410	0.0549	-0.4079		-7.42987	1	-7.42987		0.790422	-0.580845		0.0433942	0.0115058	-0.420335	0.0124347	5.51472e-17		104.58	27.729
2440	0.0523	-0.3835		-7.3327	1	-7.3327		0.781397	-0.562794		0.0408671	0.0114329	-0.395856	0.0123559	0		99.7157	27.8963
2470	0.0498	-0.3561		-7.1506	0	0		0.764485	-0.52897		0.0380714	0.0117286	-0.368776	0.0126755	0		94.0363	28.9697
2500	0.0471	-0.3269		-6.94055	0	0		0.744977	-0.489954		0.0350884	0.0120116	-0.339881	0.0129813	5.51472e-17		87.721	30.029
2530	0.0446	-0.298		-6.68161	0	0		0.720928	-0.441856		0.0321534	0.0124466	-0.311451	0.0134514	0		81.3481	31.4899
2560	0.0426	-0.2709		-6.35915	0	0		0.69098	-0.381959		0.0294357	0.0131643	-0.285127	0.014227	0		75.3555	33.7005
2590	0.0403	-0.2469		-6.12655	0	0		0.669376	-0.338753		0.0269759	0.0133241	-0.2613	0.0143998	0		69.8675	34.5095
2620	0.038	-0.2251		-5.92368	0	0		0.650535	-0.30107		0.0247203	0.0132797	-0.239452	0.0143518	-2.75736e-17		64.7673	34.7927
2650	0.0364	-0.2036		-5.59341	0	0		0.619861	-0.239721		0.0225629	0.0138371	-0.218554	0.0149542	2.75736e-17		59.7918	36.6682
2680	0.0343	-0.1817		-5.29738	0	0		0.592367	-0.184734		0.0203182	0.0139818	-0.196811	0.0151106	-2.75736e-17		54.4527	37.4713
2710	0.0315	-0.159		-5.04762	0	0		0.569171	-0.138341		0.0179289	0.0135711	-0.173667	0.0146667	0		48.5873	36.7777
2740	0.029	-0.1373		-4.73448	0	0		0.540088	-0.0801762		0.0156626	0.0133374	-0.151714	0.0144142	2.75736e-17		42.9154	36.5446
2770	0.0269	-0.1196		-4.4461	0	0		0.513304	-0.0266084		0.0138079	0.0130921	-0.133749	0.0141491	-1.37868e-17		38.2478	36.2652
2800	0.0251	-0.1043		-4.15538	0	0		0.486304	0.0273925		0.0122062	0.0128938	-0.118235	0.0139347	0		34.1774	36.1026
2830	0.0237	-0.0924		-3.89873	0	0		0.462468	0.0750641		0.0109605	0.0127395	-0.106168	0.013768	0		31.0182	36.0528
2860	0.0223	-0.0849		-3.80717	0	0		0.453964	0.0920713		0.0101234	0.0121766	-0.0980596	0.0131596	0		28.9529	34.8251
2890	0.0212	-0.0792		-3.73585	0	0		0.44734	0.10532		0.00948361	0.0117164	-0.0918623	0.0126623	0		27.4076	33.8604
2920	0.0207	-0.0734		-3.54589	0	0		0.429698	0.140604		0.00889475	0.0118053	-0.0861583	0.0127583	0		25.9727	34.4713
2950	0.0205	-0.0683		-3.33171	0	0		0.409805	0.180389		0.00840101	0.012099	-0.0813758	0.0130758	1.37868e-17		24.783	35.692
2980	0.0204	-0.0653		-3.20098	0	0		0.397664	0.204672		0.00811235	0.0122877	-0.0785797	0.0132797	0		24.1748	36.6172
3010	0.0202	-0.0632		-3.12871	0	0		0.390952	0.218096		0.00789723	0.0123028	-0.076496	0.013296	1.37868e-17		23.7707	37.0313
3040	0.0202	-0.0611		-3.02475	0	0		0.381297	0.237406		0.0077022	0.0124978	-0.0746068	0.0135068	1.37868e-17		23.4147	37.9933
3070	0.0202	-0.0591		-2.92574	0	0		0.372101	0.255797		0.00751645	0.0126836	-0.0728075	0.0137075	6.8934e-18		23.0755	38.9385
3100	0.0201	-0.0573		-2.85075	0	0		0.365136	0.269728		0.00733923	0.0127608	-0.071091	0.013791	-6.8934e-18		22.7516	39.5584
3130	0.0202	-0.0555		-2.74752	0	0		0.355549	0.288901		0.0071821	0.0130179	-0.0695689	0.0140689	6.8934e-18		22.48	40.746
3160	0.0203	-0.0538		-2.65025	0	0		0.346515	0.306971		0.00703425	0.0132658	-0.0681367	0.0143367	0		22.2282	41.9198
3190	0.0207	-0.0522		-2.52174	0	0		0.33458	0.330841		0.0069258	0.0137742	-0.0670862	0.0148862	1.37868e-17		22.0933	43.9397
3220	0.021	-0.0508		-2.41905	0	0		0.325042	0.349916		0.00682588	0.0141741	-0.0661184	0.0153184	6.8934e-18		21.9793	45.6407
3250	0.0214	-0.0494		-2.30841	0	0		0.314767	0.370467		0.00673601	0.014664	-0.0652478	0.0158478	1.37868e-17		21.892	47.658
3280	0.0218	-0.0483		-2.2156	0	0		0.306146	0.387707		0.00667399	0.015126	-0.0646472	0.0163472	6.8934e-18		21.8907	49.6133
3310	0.0221	-0.0471		-2.13122	0	0		0.29831	0.40338		0.00659266	0.0155073	-0.0638593	0.0167593	1.37868e-17		21.8217	51.3293
3340	0.0224	-0.046		-2.05357	0	0		0.291098	0.417803		0.0065206	0.0158794	-0.0631614	0.0171614	1.37868e-17		21.7788	53.0372
3370	0.0227	-0.045		-1.98238	0	0		0.284486	0.431027		0.00645784	0.0162422	-0.0625534	0.0175534	0		21.7629	54.7361
3400	0.0229	-0.0439		-1.91703	0	0		0.278417	0.443166		0.00637575	0.0165242	-0.0617583	0.0178583	-6.8934e-18		21.6776	56.1824
3430	0.0232	-0.0426		-1.83621	0	0		0.270911	0.458179		0.00628513	0.0169149	-0.0608804	0.0182804	-1.37868e-17		21.558	58.018
3460	0.0234	-0.0413		-1.76496	0	0		0.264293	0.471413		0.00618447	0.0172155	-0.0599054	0.0186054	0		21.3982	59.5658
3490	0.0236	-0.0397		-1.6822	0	0		0.256608	0.486785		0.00605594	0.0175441	-0.0586604	0.0189604	-1.37868e-17		21.1352	61.2288
3520	0.0239	-0.0379		-1.58577	0	0		0.247652	0.504697		0.00591888	0.0179811	-0.0573328	0.0194328	0		20.8344	63.2936
3550	0.0241	-0.0359		-1.48963	0	0		0.238722	0.522556		0.0057532	0.0183468	-0.055728	0.019828	-6.8934e-18		20.4239	65.1311
3580	0.0244	-0.0339		-1.38934	0	0		0.229408	0.541183		0.00559756	0.0188024	-0.0542204	0.0203204	0		20.0393	67.3127
3610	0.0248	-0.0315		-1.27016	0	0		0.218339	0.563322		0.00541481	0.0193852	-0.0524502	0.0209502	0		19.5475	69.9805
3640	0.0253	-0.0289		-1.14229	0	0		0.206463	0.587073		0.00522352	0.0200765	-0.0505973	0.0216973	-3.4467e-18		19.0136	73.0784
3670	0.0259	-0.0266		-1.02703	0	0		0.195758	0.608484		0.00507013	0.0208299	-0.0491115	0.0225115	-3.4467e-18		18.6074	76.4456
3700	0.0264	-0.0242		-0.916667	0	0		0.185508	0.628983		0.00489742	0.0215026	-0.0474385	0.0232385	3.4467e-18		18.1205	79.5595
3730	0.0265	-0.022		-0.830189	0	0		0.177477	0.645047		0.00470313	0.0217969	-0.0455566	0.0235566	-3.4467e-18		17.5427	81.3023
3760	0.0262	-0.0201		-0.767176	0	0		0.171624	0.656751		0.00449656	0.0217034	-0.0435556	0.0234556	3.4467e-18		16.9071	81.6049
3790	0.0257	-0.0183		-0.712062	0	0		0.166506	0.666989		0.0042792	0.0214208	-0.0414501	0.0231501	3.4467e-18		16.2182	81.1848
3820	0.0251	-0.0169		-0.673307	0	0		0.162906	0.674187		0.00408895	0.0210111	-0.0396073	0.0227073	-3.4467e-18		15.6198	80.2622
3850	0.0245	-0.0158		-0.644898	0	0		0.160268	0.679464		0.00392656	0.0205734	-0.0380344	0.0222344	3.4467e-18		15.1173	79.2077
3880	0.0239	-0.0146		-0.610879	0	0		0.157108	0.685783		0.00375489	0.0201451	-0.0363715	0.0217715	5.17005e-18		14.569	78.163
3910	0.0231	-0.0133		-0.575758	0	0		0.153846	0.692307		0.00355385	0.0195461	-0.0344241	0.0211241	3.4467e-18		13.8956	76.4254
3940	0.0224	-0.0123		-0.549107	0	0		0.151371	0.697257		0.00339072	0.0190093	-0.0328439	0.0205439	-8.61675e-18		13.3594	74.8966
3970	0.0216	-0.0111		-0.513889	0	0		0.1481	0.703799		0.00319897	0.018401	-0.0309866	0.0198866	5.17005e-18		12.6999	73.0521
4000	0.0207	-0.0096		-0.463768	0	0		0.143445	0.713109		0.00296932	0.0177307	-0.0287621	0.0191621	-1.72335e-18		11.8773	70.9227
4030	0.0194	-0.0074		-0.381443	0	0		0.1358	0.728401		0.00263451	0.0167655	-0.025519	0.018119	3.4467e-18		10.6171	67.5649

## Sheet: Chl-a dry ether 180 K
Spreadsheet to evaluate maximum-possible fraction of Qx absorption and Qx-Qy gap by analytical inversion of MCD and ABS data
Source: Reimers, Cai, Kobyashi, Rätsep, Freiberg and Krausz
Enter the observed data in the blue fields incolumns A,B,C as frequency, Absorption/frequency, and MCD Delta Absorption / frequency. Assumes equally spaced in frequency (else replace all sums by integrals)
NOTE: this analysis will only work well if the data has little noise, the band tails are included, there are no interfering transitions, there is only 1 species present (eg no aggregation) and the base line is accurate.
Enter the Magnetic field strength and other factors needed to express B/D in physical units in cell D17
Data filtering parameters entered in cells M12 and O12 eliminates noise due to weak signals; a small relative error in the data inversion usually results because of this
A valid soution is obtained for any rescaling ³1 of the initial Bx/Dx beyond the value that gives maximal Dx absorption, enter a rescaling in cell M13
Yellow boxes contain intermediate and final outupts
																approx Qx-Qy unperturbed gap: Ex-Ey+lx-ly=
SUM:	9.963	-1.5112			Data Filter: Include in max/min test if relative MCD signal >							0.9	rel abs >	0.03
MAX:	0.5081	0.3485			Bx/Dx from min value gives max possible Dx, rescale by (³ 1)							1						1545.52
MIN:	0.0064	-0.1835				Bx/Dx= min value			-5.34985	rescalled	-5.34985	in T^-1 =	-0.00426383			Ave E=	1818.7	273.173
						By/Dy= max value			0.750651			in T^-1 =	0.000598269
Chl-a dry ether 180 K						fraction Qx abs =Dx/(Dx+Dy)=			0.147911		ratio -Bx/By=		1.23714
B/D scaling to units of Tesla^-1			0.000797
Experimental Data:				DA/A				Polarization			Partitioned ABS and MCD						Ave abs energy
n	A/n	DA/n		Raw	Filter	Filtered		fr. X	LD		Ax/n	Ay/n	DAx/n	DAy/n	Rel error		Ax	Ay
-516	0.0126	0.0089		0.706349	0	0		0.00726192	0.985476		9.15002e-05	0.0125085	-0.000489513	0.00938951	0		-0.0472141	-6.45439
-486	0.0177	0.0135		0.762712	0	0		0	1		0	0.0177	0	0.0132865	-0.000612582		0	-8.6022
-456	0.0259	0.0192		0.741313	0	0		0.00153067	0.996939		3.96443e-05	0.0258604	-0.000212091	0.0194121	0		-0.0180778	-11.7923
-426	0.0385	0.0273		0.709091	0	0		0.0068125	0.986375		0.000262281	0.0382377	-0.00140317	0.0287032	-9.95537e-18		-0.111732	-16.2893
-396	0.0569	0.0397		0.697715	0	0		0.0086772	0.982646		0.000493733	0.0564063	-0.0026414	0.0423414	1.99107e-17		-0.195518	-22.3369
-366	0.0831	0.0577		0.694344	0	0		0.0092298	0.98154		0.000766996	0.082333	-0.00410332	0.0618033	0		-0.280721	-30.1339
-336	0.1186	0.0828		0.698145	0	0		0.00860676	0.982786		0.00102076	0.117579	-0.00546092	0.0882609	0		-0.342976	-39.5066
-306	0.1643	0.1161		0.706634	0	0		0.0072152	0.98557		0.00118546	0.163115	-0.00634203	0.122442	3.98215e-17		-0.36275	-49.913
-276	0.2199	0.1557		0.708049	0	0		0.00698327	0.986033		0.00153562	0.218364	-0.00821535	0.163915	0		-0.423831	-60.2686
-246	0.2827	0.1972		0.697559	0	0		0.00870278	0.982594		0.00246027	0.28024	-0.0131621	0.210362	-7.9643e-17		-0.605228	-68.939
-216	0.348	0.2391		0.687069	0	0		0.0104224	0.979155		0.00362698	0.344373	-0.0194038	0.258504	7.9643e-17		-0.783427	-74.3846
-186	0.41	0.2803		0.683659	0	0		0.0109814	0.978037		0.00450237	0.405498	-0.024087	0.304387	0		-0.837441	-75.4226
-156	0.4615	0.3151		0.682774	1	0.682774		0.0111265	0.977747		0.00513486	0.456365	-0.0274708	0.342571	0		-0.801038	-71.193
-126	0.4957	0.3372		0.68025	1	0.68025		0.0115401	0.97692		0.00572043	0.48998	-0.0306035	0.367803	0		-0.720774	-61.7374
-96	0.5081	0.3478		0.684511	1	0.684511		0.0108417	0.978317		0.00550865	0.502591	-0.0294705	0.37727	1.59286e-16		-0.528831	-48.2488
-66	0.4982	0.3485		0.699518	1	0.699518		0.00838165	0.983237		0.00417574	0.494024	-0.0223396	0.37084	0		-0.275599	-32.6056
-36	0.4682	0.3384		0.722768	1	0.722768		0.00457053	0.990859		0.00213992	0.46606	-0.0114483	0.349848	0		-0.0770372	-16.7782
-6	0.4227	0.3173		0.750651	1	0.750651		0	1		0	0.4227	0	0.3173	0		0	-2.5362
24	0.3682	0.2838		0.770777	0	0		0	1		0	0.3682	0	0.27639	-0.0212639		0	8.8368
54	0.3109	0.2396		0.770666	0	0		0	1		0	0.3109	0	0.233377	-0.0178558		0	16.7886
84	0.2563	0.1943		0.758096	0	0		0	1		0	0.2563	0	0.192392	-0.00547563		0	21.5292
114	0.2082	0.157		0.754083	0	0		0	1		0	0.2082	0	0.156285	-0.00205036		0	23.7348
144	0.1681	0.1277		0.759667	0	0		0	1		0	0.1681	0	0.126184	-0.00434903		0	24.2064
174	0.136	0.1031		0.758088	0	0		0	1		0	0.136	0	0.102088	-0.0029025		0	23.664
204	0.1113	0.083		0.745732	0	0		0.000806216	0.998388		8.97318e-05	0.11121	-0.000480052	0.0834801	0		0.0183053	22.6869
234	0.0924	0.068		0.735931	0	0		0.00241289	0.995174		0.000222951	0.092177	-0.00119276	0.0691928	0		0.0521705	21.5694
264	0.0778	0.0575		0.739075	0	0		0.00189755	0.996205		0.00014763	0.0776524	-0.000789797	0.0582898	0		0.0389742	20.5002
294	0.0667	0.0494		0.74063	0	0		0.00164263	0.996715		0.000109564	0.0665904	-0.00058615	0.0499861	-1.99107e-17		0.0322117	19.5776
324	0.0581	0.0424		0.729776	0	0		0.00342174	0.993157		0.000198803	0.0579012	-0.00106357	0.0434636	-1.99107e-17		0.0644122	18.76
354	0.0513	0.0366		0.71345	0	0		0.0060979	0.987804		0.000312822	0.0509872	-0.00167355	0.0382736	0		0.110739	18.0495
384	0.0464	0.0314		0.676724	0	0		0.0121181	0.975764		0.000562279	0.0458377	-0.00300811	0.0344081	-1.99107e-17		0.215915	17.6017
414	0.0429	0.0258		0.601399	0	0		0.0244655	0.951069		0.00104957	0.0418504	-0.00561505	0.031415	-9.95537e-18		0.434522	17.3261
444	0.0405	0.0203		0.501235	0	0		0.0408845	0.918231		0.00165582	0.0388442	-0.0088584	0.0291584	0		0.735185	17.2468
474	0.039	0.016		0.410256	0	0		0.0557977	0.888405		0.00217611	0.0368239	-0.0116419	0.0276419	0		1.03148	17.4545
504	0.0384	0.0127		0.330729	0	0		0.0688339	0.862332		0.00264322	0.0357568	-0.0141408	0.0268408	4.97769e-18		1.33218	18.0214
534	0.0384	0.0088		0.229167	0	0		0.0854821	0.829036		0.00328251	0.0351175	-0.017561	0.026361	4.97769e-18		1.75286	18.7527
564	0.0388	0.0042		0.108247	0	0		0.105303	0.789393		0.00408577	0.0347142	-0.0218583	0.0260583	7.46653e-18		2.30437	19.5788
594	0.0397	-0.0002		-0.00503778	0	0		0.123873	0.752254		0.00491776	0.0347822	-0.0263093	0.0261093	1.34553e-17		2.92115	20.6606
624	0.041	-0.0051		-0.12439	0	0		0.143437	0.713125		0.00588094	0.0351191	-0.0314621	0.0263621	0		3.6697	21.9143
654	0.0426	-0.012		-0.28169	0	0		0.169222	0.661556		0.00720886	0.0353911	-0.0385664	0.0265664	1.99107e-17		4.7146	23.1458
684	0.0447	-0.021		-0.469799	0	0		0.200057	0.599886		0.00894255	0.0357574	-0.0478413	0.0268413	0		6.11671	24.4581
714	0.0472	-0.0317		-0.67161	0	0		0.233138	0.533724		0.0110041	0.0361959	-0.0588705	0.0271705	0		7.85694	25.8439
744	0.05	-0.0441		-0.882	0	0		0.267625	0.464749		0.0133813	0.0366187	-0.0715879	0.0274879	1.99107e-17		9.95567	27.2443
774	0.0532	-0.0573		-1.07707	0	0		0.299601	0.400798		0.0159388	0.0372612	-0.0852702	0.0279702	-1.99107e-17		12.3366	28.8402
804	0.0565	-0.0702		-1.24248	0	0		0.326715	0.346569		0.0184594	0.0380406	-0.0987552	0.0285552	0		14.8414	30.5846
834	0.0595	-0.0818		-1.37479	0	0		0.348404	0.303192		0.02073	0.03877	-0.110903	0.0291027	3.98215e-17		17.2889	32.3341
864	0.0623	-0.0905		-1.45265	0	0		0.361167	0.277667		0.0225007	0.0397993	-0.120375	0.0298754	7.9643e-17		19.4406	34.3866
894	0.0644	-0.0952		-1.47826	0	0		0.365365	0.26927		0.0235295	0.0408705	-0.125879	0.0306795	0		21.0354	36.5382
924	0.0658	-0.0958		-1.45593	0	0		0.361704	0.276592		0.0238001	0.0419999	-0.127327	0.0315272	0		21.9913	38.8079
954	0.0667	-0.0924		-1.38531	0	0		0.350128	0.299744		0.0233535	0.0433465	-0.124938	0.032538	0		22.2793	41.3525
984	0.0671	-0.086		-1.28167	0	0		0.33314	0.333721		0.0223537	0.0447463	-0.119589	0.0335889	0		21.996	44.0304
1014	0.067	-0.078		-1.16418	0	0		0.313881	0.372239		0.02103	0.04597	-0.112507	0.0345074	-3.98215e-17		21.3244	46.6136
1044	0.0668	-0.069		-1.03293	0	0		0.292367	0.415267		0.0195301	0.0472699	-0.104483	0.0354832	3.98215e-17		20.3894	49.3498
1074	0.0663	-0.0592		-0.892911	0	0		0.269414	0.461172		0.0178622	0.0484378	-0.0955599	0.0363599	1.99107e-17		19.1839	52.0223
1104	0.0656	-0.0494		-0.753049	0	0		0.246488	0.507025		0.0161696	0.0494304	-0.086505	0.037105	1.99107e-17		17.8512	54.5712
1134	0.0645	-0.041		-0.635659	0	0		0.227245	0.54551		0.0146573	0.0498427	-0.0784144	0.0374144	3.98215e-17		16.6214	56.5216
1164	0.0634	-0.0344		-0.542587	0	0		0.211989	0.576023		0.0134401	0.0499599	-0.0719024	0.0375024	1.99107e-17		15.6442	58.1534
1194	0.0621	-0.0305		-0.491143	0	0		0.203556	0.592888		0.0126408	0.0494592	-0.0676266	0.0371266	1.99107e-17		15.0931	59.0543
1224	0.0603	-0.0295		-0.489221	0	0		0.203241	0.593519		0.0122554	0.0480446	-0.0655647	0.0360647	0		15.0006	58.8066
1254	0.0579	-0.0299		-0.516408	0	0		0.207697	0.584605		0.0120257	0.0458743	-0.0643356	0.0344356	9.95537e-18		15.0802	57.5264
1284	0.0549	-0.0297		-0.540984	0	0		0.211726	0.576548		0.0116237	0.0432763	-0.0621853	0.0324853	-9.95537e-18		14.9249	55.5667
1314	0.0517	-0.0293		-0.566731	0	0		0.215946	0.568107		0.0111644	0.0405356	-0.0597281	0.0304281	9.95537e-18		14.6701	53.2637
1344	0.0486	-0.0294		-0.604938	0	0		0.222209	0.555581		0.0107994	0.0378006	-0.0577751	0.0283751	0		14.5144	50.804
1374	0.0455	-0.0298		-0.654945	0	0		0.230406	0.539187		0.0104835	0.0350165	-0.0560852	0.0262852	0		14.4043	48.1127
1404	0.0424	-0.0294		-0.693396	0	0		0.236709	0.526581		0.0100365	0.0323635	-0.0536937	0.0242937	-2.98661e-17		14.0912	45.4384
1434	0.0393	-0.0282		-0.717557	0	0		0.24067	0.51866		0.00945833	0.0298417	-0.0506007	0.0224007	0		13.5632	42.793
1464	0.0363	-0.0277		-0.763085	0	0		0.248133	0.503734		0.00900722	0.0272928	-0.0481873	0.0204873	1.99107e-17		13.1866	39.9566
1494	0.0332	-0.0284		-0.855422	0	0		0.263269	0.473463		0.00874052	0.0244595	-0.0467605	0.0183605	-1.99107e-17		13.0583	36.5425
1524	0.0305	-0.03		-0.983607	0	0		0.284281	0.431438		0.00867057	0.0218294	-0.0463863	0.0163863	-2.98661e-17		13.2139	33.2681
1554	0.0279	-0.0331		-1.18638	0	0		0.31752	0.364961		0.0088588	0.0190412	-0.0473933	0.0142933	0		13.7666	29.59
1584	0.0256	-0.0378		-1.47656	0	0		0.365087	0.269827		0.00934622	0.0162538	-0.0500009	0.0122009	1.99107e-17		14.8044	25.746
1614	0.0238	-0.0435		-1.82773	0	0		0.422651	0.154699		0.0100591	0.0137409	-0.0538146	0.0103146	1.99107e-17		16.2354	22.1778
1644	0.0224	-0.0497		-2.21875	0	0		0.486747	0.0265066		0.0109031	0.0114969	-0.0583301	0.00863014	1.99107e-17		17.9247	18.9009
1674	0.0215	-0.0563		-2.6186	0	0		0.552291	-0.104582		0.0118743	0.00962574	-0.0635256	0.00722557	3.98215e-17		19.8775	16.1135
1704	0.0213	-0.0633		-2.97183	0	0		0.610192	-0.220385		0.0129971	0.0083029	-0.0695326	0.00623258	3.98215e-17		22.1471	14.1481
1734	0.0215	-0.0718		-3.33953	0	0		0.670467	-0.340933		0.014415	0.00708497	-0.0771183	0.00531833	0		24.9957	12.2853
1764	0.022	-0.0817		-3.71364	0	0		0.73179	-0.46358		0.0160994	0.00590063	-0.0861293	0.00442931	0		28.3993	10.4087
1794	0.023	-0.0927		-4.03043	0	0		0.78372	-0.567439		0.0180256	0.00497445	-0.0964341	0.00373407	0		32.3378	8.92416
1824	0.0244	-0.1047		-4.29098	0	0		0.826429	-0.652858		0.0201649	0.00423513	-0.107879	0.0031791	3.98215e-17		36.7807	7.72488
1854	0.026	-0.1177		-4.52692	0	0		0.865104	-0.730209		0.0224927	0.00350729	-0.120333	0.00263275	0		41.7015	6.50251
1884	0.0276	-0.1314		-4.76087	0	0		0.903453	-0.806906		0.0249353	0.00266469	-0.1334	0.00200025	0		46.9781	5.02028
1914	0.0294	-0.1451		-4.93537	0	0		0.932058	-0.864116		0.0274025	0.00199749	-0.146599	0.00149942	0		52.4484	3.8232
1944	0.031	-0.1582		-5.10323	0	0		0.959572	-0.919145		0.0297467	0.00125325	-0.159141	0.000940756	0		57.8277	2.43633
1974	0.0324	-0.1697		-5.23765	1	-5.23765		0.981608	-0.963216		0.0318041	0.000595898	-0.170147	0.000447311	0		62.7813	1.1763
2004	0.0335	-0.1781		-5.31642	1	-5.31642		0.994519	-0.989038		0.0333164	0.00018361	-0.178238	0.000137827	7.9643e-17		66.766	0.367955
2034	0.0341	-0.1824		-5.34897	1	-5.34897		0.999856	-0.999711		0.0340951	4.9224e-06	-0.182404	3.69501e-06	0		69.3494	0.0100122
2064	0.0343	-0.1835		-5.34985	1	-5.34985		1	-1		0.0343	0	-0.1835	0	0		70.7952	0
2094	0.0341	-0.1819		-5.33431	1	-5.33431		0.997452	-0.994904		0.0340131	8.68828e-05	-0.181965	6.52187e-05	-7.9643e-17		71.2235	0.181933
2124	0.0336	-0.1773		-5.27679	1	-5.27679		0.988023	-0.976045		0.0331976	0.000402442	-0.177602	0.000302094	7.9643e-17		70.5116	0.854788
2154	0.0329	-0.1706		-5.18541	1	-5.18541		0.973044	-0.946088		0.0320132	0.000886845	-0.171266	0.000665711	0		68.9563	1.91026
2184	0.032	-0.1629		-5.09062	0	0		0.957507	-0.915014		0.0306402	0.00135978	-0.163921	0.00102072	0		66.9182	2.96976
2214	0.0312	-0.1552		-4.97436	0	0		0.938448	-0.876897		0.0292796	0.00192041	-0.156642	0.00144155	7.9643e-17		64.825	4.25178
2244	0.0302	-0.1485		-4.91722	0	0		0.929082	-0.858164		0.0280583	0.00214172	-0.150108	0.00160769	0		62.9628	4.80603
2274	0.0293	-0.1432		-4.88737	0	0		0.92419	-0.848379		0.0270788	0.00222125	-0.144867	0.00166738	0		61.5771	5.05112
2304	0.0284	-0.138		-4.85915	0	0		0.919564	-0.839128		0.0261156	0.00228438	-0.139715	0.00171477	0		60.1704	5.26321
2334	0.0273	-0.1316		-4.82051	0	0		0.91323	-0.82646		0.0249312	0.00236882	-0.133378	0.00177816	0		58.1894	5.52883
2364	0.0263	-0.1247		-4.74144	0	0		0.900269	-0.800538		0.0236771	0.00262292	-0.126669	0.0019689	0		55.9726	6.20059
2394	0.0253	-0.1178		-4.65613	0	0		0.886284	-0.772567		0.022423	0.00287703	-0.11996	0.00215964	3.98215e-17		53.6806	6.8876
2424	0.0241	-0.1103		-4.57676	0	0		0.873274	-0.746549		0.0210459	0.00305409	-0.112593	0.00229255	-3.98215e-17		51.0153	7.40311
2454	0.0228	-0.1016		-4.45614	0	0		0.853502	-0.707003		0.0194598	0.00334016	-0.104107	0.00250729	0		47.7544	8.19676
2484	0.0215	-0.0923		-4.29302	0	0		0.826763	-0.653527		0.0177754	0.00372459	-0.0950959	0.00279586	-3.98215e-17		44.1541	9.25188
2514	0.0201	-0.0833		-4.14428	0	0		0.802381	-0.604762		0.0161279	0.00397214	-0.0862817	0.00298169	0		40.5454	9.98596
2544	0.0187	-0.0749		-4.00535	0	0		0.779607	-0.559215		0.0145787	0.00412134	-0.0779937	0.00309369	-3.98215e-17		37.0881	10.4847
2574	0.0174	-0.0675		-3.87931	0	0		0.758947	-0.517894		0.0132057	0.00419432	-0.0706485	0.00314847	3.98215e-17		33.9914	10.7962
2604	0.0161	-0.0607		-3.77019	0	0		0.741059	-0.482119		0.0119311	0.00416894	-0.0638294	0.00312942	3.98215e-17		31.0685	10.8559
2634	0.0149	-0.0545		-3.65772	0	0		0.722624	-0.445247		0.0107671	0.00413291	-0.0576024	0.00310237	-1.99107e-17		28.3605	10.8861
2664	0.0139	-0.0488		-3.51079	0	0		0.698539	-0.397078		0.0097097	0.0041903	-0.0519455	0.00314545	1.99107e-17		25.8666	11.163
2694	0.013	-0.0439		-3.37692	0	0		0.676595	-0.353191		0.00879574	0.00420426	-0.0470559	0.00315593	-1.99107e-17		23.6957	11.3263
2724	0.0121	-0.0399		-3.29752	0	0		0.66358	-0.327159		0.00802931	0.00407069	-0.0429557	0.00305566	0		21.8719	11.0885
2754	0.0113	-0.0365		-3.23009	0	0		0.652526	-0.305052		0.00737355	0.00392645	-0.0394474	0.0029474	1.99107e-17		20.3067	10.8135
2784	0.0106	-0.0332		-3.13208	0	0		0.63646	-0.27292		0.00674647	0.00385353	-0.0360927	0.00289265	0		18.7822	10.7282
2814	0.0099	-0.0296		-2.9899	0	0		0.613154	-0.226308		0.00607023	0.00382977	-0.0324748	0.00287482	1.99107e-17		17.0816	10.777
2844	0.0093	-0.0259		-2.78495	0	0		0.579558	-0.159116		0.00538989	0.00391011	-0.0288351	0.00293513	0		15.3288	11.1204
2874	0.0089	-0.0228		-2.5618	0	0		0.542979	-0.0859588		0.00483252	0.00406748	-0.0258533	0.00305326	9.95537e-18		13.8887	11.6899
2904	0.0084	-0.0207		-2.46429	0	0		0.526995	-0.0539903		0.00442676	0.00397324	-0.0236825	0.00298252	9.95537e-18		12.8553	11.5383
2934	0.0082	-0.0194		-2.36585	0	0		0.51086	-0.0217201		0.00418905	0.00401095	-0.0224108	0.00301082	0		12.2907	11.7681
2964	0.0081	-0.019		-2.34568	0	0		0.507553	-0.015106		0.00411118	0.00398882	-0.0219942	0.00299421	0		12.1855	11.8229
2994	0.0079	-0.0186		-2.35443	0	0		0.508988	-0.0179751		0.004021	0.003879	-0.0215118	0.00291177	1.99107e-17		12.0389	11.6137
3024	0.008	-0.0176		-2.2	0	0		0.483673	0.0326536		0.00386939	0.00413061	-0.0207006	0.00310065	-9.95537e-18		11.701	12.491
3054	0.0081	-0.0161		-1.98765	0	0		0.448865	0.102269		0.00363581	0.00446419	-0.019451	0.00335105	0		11.1038	13.6336
3084	0.0081	-0.0151		-1.8642	0	0		0.428628	0.142744		0.00347189	0.00462811	-0.0185741	0.00347409	-4.97769e-18		10.7073	14.2731
3114	0.0083	-0.0151		-1.81928	0	0		0.421265	0.15747		0.0034965	0.0048035	-0.0187058	0.00360575	9.95537e-18		10.8881	14.9581
3144	0.0086	-0.0155		-1.80233	0	0		0.418486	0.163028		0.00359898	0.00500102	-0.019254	0.00375402	9.95537e-18		11.3152	15.7232
3174	0.0087	-0.0155		-1.78161	0	0		0.41509	0.16982		0.00361128	0.00508872	-0.0193198	0.00381985	4.97769e-18		11.4622	16.1516
3204	0.0089	-0.0149		-1.67416	0	0		0.397477	0.205047		0.00353754	0.00536246	-0.0189253	0.00402533	-9.95537e-18		11.3343	17.1813
3234	0.0091	-0.0142		-1.56044	0	0		0.378836	0.242328		0.00344741	0.00565259	-0.0184431	0.00424312	9.95537e-18		11.1489	18.2805
3264	0.0092	-0.014		-1.52174	0	0		0.372492	0.255016		0.00342693	0.00577307	-0.0183336	0.00433356	9.95537e-18		11.1855	18.8433
3294	0.0095	-0.014		-1.47368	0	0		0.364615	0.27077		0.00346384	0.00603616	-0.018531	0.00453105	4.97769e-18		11.4099	19.8831
3324	0.0098	-0.0136		-1.38776	0	0		0.350529	0.298941		0.00343519	0.00636481	-0.0183778	0.00477775	-4.97769e-18		11.4186	21.1566
3354	0.0101	-0.0126		-1.24752	0	0		0.327543	0.344915		0.00330818	0.00679182	-0.0176983	0.00509828	0		11.0956	22.7798
3384	0.0103	-0.0113		-1.09709	0	0		0.302883	0.394234		0.00311969	0.00718031	-0.0166899	0.0053899	4.97769e-18		10.557	24.2982
3414	0.0105	-0.0108		-1.02857	0	0		0.291652	0.416697		0.00306234	0.00743766	-0.0163831	0.00558308	9.95537e-18		10.4548	25.3922
3444	0.0107	-0.0111		-1.03738	0	0		0.293096	0.413808		0.00313613	0.00756387	-0.0167778	0.00567783	1.49331e-17		10.8008	26.05
3474	0.0108	-0.0115		-1.06481	0	0		0.297593	0.404815		0.003214	0.007586	-0.0171944	0.00569443	0		11.1654	26.3538
3504	0.0109	-0.0114		-1.04587	0	0		0.294487	0.411025		0.00320991	0.00769009	-0.0171726	0.00577257	9.95537e-18		11.2475	26.9461
3534	0.0109	-0.011		-1.00917	0	0		0.288472	0.423056		0.00314434	0.00775566	-0.0168218	0.00582179	9.95537e-18		11.1121	27.4085
3564	0.0108	-0.0102		-0.944444	0	0		0.277861	0.444277		0.0030009	0.0077991	-0.0160544	0.0058544	4.97769e-18		10.6952	27.796
3594	0.0108	-0.0086		-0.796296	0	0		0.253577	0.492846		0.00273863	0.00806137	-0.0146513	0.00605127	4.97769e-18		9.84264	28.9726
3624	0.0107	-0.0063		-0.588785	0	0		0.219561	0.560877		0.00234931	0.00835069	-0.0125685	0.00626845	2.48884e-18		8.51389	30.2629
3654	0.0105	-0.0044		-0.419048	0	0		0.191738	0.616524		0.00201325	0.00848675	-0.0107706	0.00637059	7.46653e-18		7.35641	31.0106
3684	0.0104	-0.0041		-0.394231	0	0		0.18767	0.62466		0.00195177	0.00844823	-0.0104417	0.00634167	0		7.19031	31.1233
3714	0.0103	-0.0046		-0.446602	0	0		0.196255	0.607491		0.00202142	0.00827858	-0.0108143	0.00621432	2.48884e-18		7.50757	30.7466
3744	0.01	-0.0045		-0.45	0	0		0.196812	0.606377		0.00196812	0.00803188	-0.0105291	0.00602914	0		7.36863	30.0714
3774	0.0099	-0.0039		-0.393939	0	0		0.187622	0.624756		0.00185746	0.00804254	-0.00993714	0.00603714	0		7.01005	30.3525
3804	0.0097	-0.0033		-0.340206	0	0		0.178814	0.642372		0.0017345	0.0079655	-0.00927931	0.00597931	2.48884e-18		6.59803	30.3008
3834	0.0093	-0.0024		-0.258065	0	0		0.165349	0.669301		0.00153775	0.00776225	-0.00822674	0.00582674	1.24442e-18		5.89573	29.7605
3864	0.009	-0.0012		-0.133333	0	0		0.144903	0.710193		0.00130413	0.00769587	-0.00697691	0.00577691	3.11105e-18		5.03916	29.7368
3894	0.0087	-0.0002		-0.0229885	0	0		0.126816	0.746369		0.0011033	0.0075967	-0.00590247	0.00570247	3.49994e-18		4.29623	29.5816
3924	0.0082	0.0003		0.0365854	0	0		0.11705	0.7659		0.000959812	0.00724019	-0.00513485	0.00543485	2.33329e-18		3.7663	28.4105
3954	0.0078	0.001		0.128205	0	0		0.102032	0.795936		0.000795848	0.00700415	-0.00425767	0.00525767	0		3.14678	27.6944
3984	0.0075	0.0015		0.2	0	0		0.0902631	0.819474		0.000676973	0.00682303	-0.00362171	0.00512171	2.48884e-18		2.69706	27.1829
4014	0.007	0.0015		0.214286	0	0		0.0879214	0.824157		0.00061545	0.00638455	-0.00329257	0.00479257	2.48884e-18		2.47042	25.6276
4044	0.0067	0.0011		0.164179	0	0		0.0961349	0.80773		0.000644104	0.0060559	-0.00344586	0.00454586	-6.22211e-19		2.60476	24.49
4074	0.0064	0.0009		0.140625	0	0		0.0999959	0.800008		0.000639974	0.00576003	-0.00342377	0.00432377	-6.22211e-19		2.60725	23.4663

[truncated: 7 more sheets: ChlZ(D1) PS-II 1.7 K, BChl-d ether, BChl-c ether, Chl-a pyridine, Chl-d MeOH-EtOH 1.7 K, BChl-d pyridine, BChl-c pyridine]
